# A Meta-Review about Medical 3D Printing

Melissa Meister, Gijs Luijten, Christina Gsaxner, Kunpeng Xie, Lennart J. Gruber, Jianning Li, Antonio Pepe, Yao Li, Ashkan Rashad, Constantin Seibold, Fin H. Bahnsen, Moon Kim, Nino Fijačko, Frank Hölzle, Malik Sallam, Rainer Röhrig, Gregor Štiglic, Julius Keyl, Jens Kleesiek, Victor Alves, Xiaojun Chen, Behrus Puladi\*, Jan Egger\*

\*Co-Last

**Abstract**—In recent years, 3D printing (3DP) has gained importance in various fields. This technology has numerous applications, particularly in medicine. This contribution provides an overview on the state of the art of 3DP in medicine and showcases its current use in different medical disciplines and for medical education. In this meta-review, we provide a detailed listing of systematic reviews on this topic as this technology has become increasingly applied in modern medicine. We identified 134 relevant systematic reviews on medical 3DP in the medical search engine PubMed until 2023. 3DP has applications in various medical specialties, but is mainly used in orthopedics, oral and maxillofacial surgery, dentistry, cardiology and neurosurgery. In surgical contexts, the adoption of 3DP contributes to a reduction in operation time, reduced blood loss, minimized fluoroscopy time and an overall improved surgical outcome. Nevertheless, the primary use of 3DP is observed in non-invasive applications, particularly in the creation of patient-specific models (PSM). These PSMs enhance the visualization of patients' anatomy and pathology, thereby facilitating surgical planning and execution, medical education and patient counseling. The current significance of 3DP in medicine offers a compelling perspective on the potential for more individualized and personalized medical treatments in the future.

**Index Terms**—3D Printing, Medical, Meta-Review

## 1 INTRODUCTION

3D-printing (3DP) has numerous applications in medical settings. This contribution offers an overview of 3DP in medicine and showcases its current use in medical disciplines such as oral and maxillofacial surgery or medical education. We provide a comprehensive compilation of systematic reviews on this topic, emphasizing the integration of this technology into modern medicine. We conducted a search for the keyword “3D printing” in the medical search engine PubMed, which delivered almost 30,000 articles. The substantial volume of existing literature underscores the significance of this topic. Consequently, we narrowed our focus to systematic reviews on medical 3DP, resulting in 204 publications in the last search conducted at the beginning of 2024. Following the exclusion of non-relevant publications, we provide a meta-review of a final set of 134 systematic reviews. From each systematic review, we provide information about the targeted medical field, organ, pathology and/or procedure, the used printing materials and the associated costs in terms of financial investment and time. We further report the number of included publications on the reviews, the used search keywords and conclusions, as well as the quality of the systematic review.

- M. Meister, G. Luijten, C. Gsaxner, A. Pepe and J. Egger are with the Institute of Computer Graphics and Vision (ICG), Graz University of Technology, Inffeldgasse 16c, 8010 Graz, Austria.
- K. Xie, Y. Li, A. Rashad, F. Hölzle and B. Puladi are with the Department of Oral and Maxillofacial Surgery, University Hospital RWTH Aachen, Pauwelsstraße 30, 52074 Aachen, Germany.
- K. Xie, Y. Li, R. Röhrig and B. Puladi are with the Institute of Medical Informatics, University Hospital RWTH Aachen, Pauwelsstraße 30, 52074 Aachen, Germany.
- L. J. Gruber is with the Department of Oral and Maxillofacial Surgery, University Medical Center Göttingen, Robert-Koch-Straße 40, 37075 Göttingen, Germany.
- G. Luijten, J. Li, C. Seibold, F. H. Bahnsen, M. Kim, J. Keyl, J. Kleesiek and J. Egger are with the Institute for Artificial Intelligence in Medicine (IKIM), University Hospital Essen (AöR), Girardetstraße 2, 45131 Essen, Germany. E-mail: Jan.Egger@uk-essen.de
- N. Fijačko and G. Štiglic are with the University of Maribor, Faculty of Health Sciences, Zitna 15, Maribor 2000, Slovenia.
- M. Sallam is with the Department of Pathology, Microbiology and Forensic Medicine, School of Medicine, The University of Jordan, Amman 11942, Jordan.
- M. Sallam is with the Department of Clinical Laboratories and Forensic Medicine, Jordan University Hospital, Amman 11942, Jordan.
- J. Kleesiek and J. Egger are with the Cancer Research Center Cologne Essen (CCCE), University Medicine Essen (AöR), Hufelandstraße 55, 45147 Essen, Germany.
- J. Kleesiek is with the German Cancer Consortium (DKTK), Partner Site Essen, Hufelandstraße 55, 45147 Essen, Germany, and the Department of Physics, TU Dortmund University, August-Schmidt-Str. 4, 44227 Dortmund, Germany.
- V. Alves is with the Center Algoritmi / LASI, University of Minho, Braga, 4710-057, Portugal.
- X. Chen is with the Institute of Biomedical Manufacturing and Life Quality Engineering, State Key Laboratory of Mechanical System and Vibration, School of Mechanical Engineering, Shanghai Jiao Tong University, 800 Dongchuan Road, Shanghai, 200240, People's Republic of China.
- X. Chen is with the Institute of Medical Robotics, Shanghai Jiao Tong University, Shanghai, People's Republic of China.

- J. Egger is with the Center for Virtual and Extended Reality in Medicine (ZvRM), University Hospital Essen, University Medicine Essen, Hufelandstraße 55, 45147 Essen, Germany.

**NOTE:** This preprint reports new research that has not been certified by peer review and should not be used to guide clinical practice.

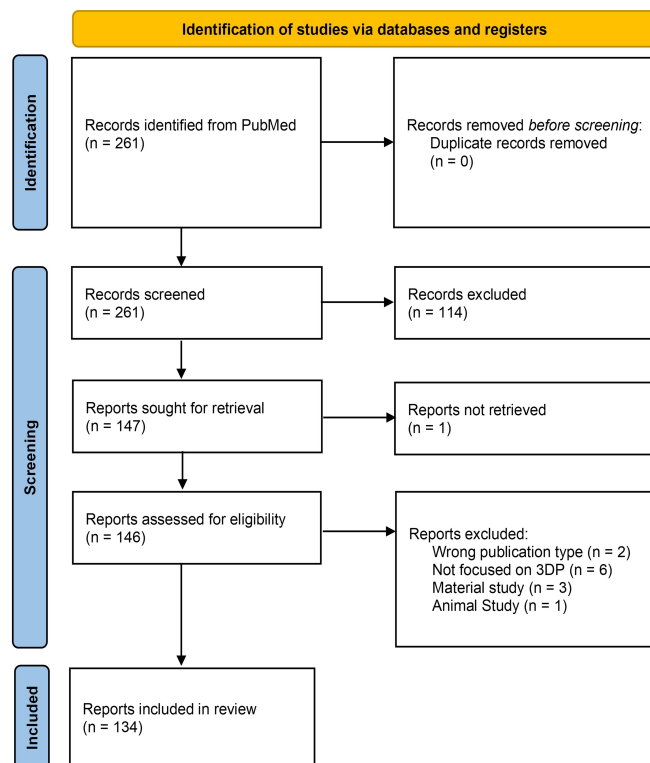

Figure 1: PRISMA flowchart of the screening process.

## 2 REVIEWS IN MEDICAL 3D PRINTING

### 2.1 Search Strategy

An electronic search was performed in the database PubMed, with the search term "3D printing" filtered for systematic reviews at January 28th, 2024. Inclusion criteria were systematic reviews, with or without meta-analysis, written in English, focusing on 3D printing in clinical use or medical education, or comparing 3DP with other approaches. Exclusion criteria were publications on bioprinting only, animal studies only, focus on material properties or printing technology, 3DP as one of many topics, and no English full text. The literature search was performed independently by M.L. and B.P. and was resolved by G.L. or J.E. in case of disagreement. Rayyan.ai was used as a tool. The initial database search yielded 261 papers from 2015 to 2024, which were then screened based on their title and abstract. Out of these, 114 records were excluded because they did not meet the criteria. Of 146 papers, 13 further papers were excluded, 1 was not accessible, 2 were the wrong publication type (i.e. not a systematic review), 6 did not focus on 3DP, 3 were material studies and 1 was an animal study, leaving 134 papers in our meta-review (Figure 1).

### 2.2 Data extraction

We collected the full-text articles in Mendeley. Data extraction from the 134 papers was performed by M.M. and G.L. In case of discrepancies, B.P. and J.E. were consolidated and then classified according to the degree of invasiveness (Figure 2): non-invasive (see Table 1), on-body (see Table 2), invasive non-permanent (see Table 3), and invasive permanent devices (see Table 4). (Note: The classification does

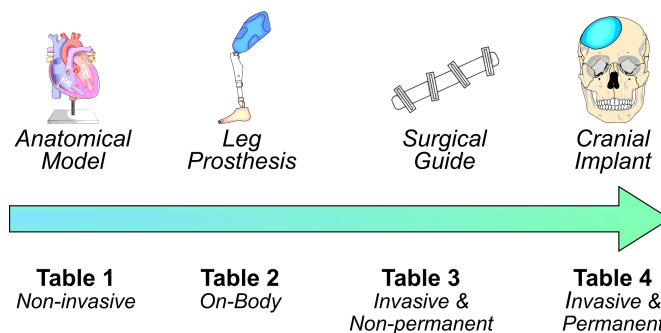

Figure 2: Degree of invasiveness. The heart was created by Eric Pierce and the prosthetic leg was created by Jean-Paul Gibert and color matched for the illustration. License CC-BY 4.0.

not necessarily reflect the Medical Device Regulation, e.g. Class I, IIa, IIb, III). Where papers could be classified in more than one category, they were listed in several tables (n= 8). However, eight publications could not be classified in any category, despite their clinical relevance. These were publications that focused primarily on printing materials in the clinical setting. The following information was extracted from each review and collected in the tables from left to right: author, medical field, organ, pathology described (Path.), medical procedure, material used for printing, application (preoperative planning (P), teaching (T) or patient counseling (C)), authors' region, the costs associated with hardware or the printing process, the time saved by using the technology or the time of the whole printing process and the conclusion of the review. We further include information on whether the study is a meta-analysis (MA), ('yes' if yes, 'no' if not), the number of reviewed papers included (IP), the keywords from the paper (KW). Finally, we assess the quality of the study: whether it followed the PRISMA guidelines, whether the review was registered (e.g. in PROSPERO) and whether it included a bias assessment (BA).

### 2.3 Reviews in Medical 3D Printing

#### 2.3.1 Non-Invasive Applications

In Table 1, reviews studying non-invasive methods are listed (n = 106). Non-invasive devices are external applications, like 3DP models. The medical fields included are anesthesia [1], cardiology [2–13], coloproctology [14], dentistry [15–18], general surgery [19–25], health care engineering [26, 27], hepatology [28], interventional radiology [29], medical education [30–34], neurosurgery [35–39], oncology [40–43] and radiation oncology [44–46]. Further medical fields included are oral and maxillofacial surgery [47–56], orthopedics [57–77] and otorhinolaryngology [78–84]. The field of pediatrics [85–92] included sub-specialties such as, orthopedics [92], otorhinolaryngology [85, 86] and oncology [91]. Yang and colleagues [87] mentioned the following pediatric surgical sub-specialties: neurosurgery, cardiothoracic Surgery, plastic Surgery, cardiovascular surgery, urological surgery, orthopedics, ENT surgery, oncological surgery and vascular surgery. Further medical fields include plastic surgery [93, 94], traumatology [95–97], urology [98–102] and vascular

surgery [103–106].

The affected organs or organ systems include the aorta [13, 103, 106], bladder [29], brain [35, 37, 39], cranium [30, 31, 34, 36, 44, 48–50, 53–55, 82, 84, 86, 91], ear [48, 78–81, 83, 93], female internal genitals [46], heart [2–12, 87, 88, 104], jaw [17, 20, 21, 23, 25, 47–52, 55, 56], kidney [29, 41, 98, 100–102], lip [94], liver [19, 22, 28], musculoskeletal system [20, 21, 24, 31–33, 38, 43, 57–77, 89, 90, 92, 93, 95–97], prostate [98, 99], rectum and colon [14, 40, 42, 45], spine [38, 59, 68, 77, 92], teeth [15–18], thyroid gland [45], upper and lower respiratory tract [1, 45, 85] and vessels [39, 105].

The pathologies in this section include cardiovascular diseases [2–8, 10–12, 103–106] such as congenital heart disease, aneurysm and left atrial appendage. The second group includes cerebrovascular diseases [35, 37, 39, 104], such as aneurysm, stroke and cranial defects. Further pathologies are musculoskeletal diseases [25, 36, 43, 47, 48, 50, 53–55, 57–65, 67–77, 90–92, 95–97] which include different fracture types, such as pelvic fractures and tibial plateau fractures but also complex spinal deformities. Finally, diseases of the urogenital tract were found [29, 41, 46, 98–100, 102] such as renal disease.

Procedures include orthopedic surgery [25, 57–77, 95–97]. More precisely foot and ankle fracture fixation [76], tibial plateau fracture surgery [73, 74], open reduction and internal fixation surgery [75, 97], fracture surgery [57, 60–65, 69, 71, 72, 74, 95, 96], treatment of pelvic ring injuries [70], osteotomy [58, 66], total hip and knee arthroplasty [67]. Quinones and colleagues mention [77] complex en-bloc resections of primary vertebral tumors, complex cranio-cervical junction surgeries, spinal deformity correction surgeries, fracture-dislocations of the thoracic and lumbar spine, minimally invasive surgery, disc replacement surgery. The next procedures included cardiovascular surgery [2–13, 103, 104, 106] are aneurysm repair [103, 104, 106], left atrial appendage closure [5, 10–12], transcatheter aortic valve replacement [8, 13] and intra-cardiac repair with surgical or catheter-based procedures [2]. Neurosurgical procedures [35–39, 104] include aneurysm clipping [35, 38, 104], cranioplasty [36] and open vascular and endovascular surgery [37]. Blohm and colleagues [35] add ventriculostomy and external ventricular drain placement, clinoidectomy, sagittal sinus repair, arteriovenous malformation repair, carotid artery dissection repair and hematoma repair. Another author mentions transnasal sphenoid endoscopy, cerebrovascular, spinal functional surgery [38]. Oral and maxillofacial surgical procedures and plastic surgery procedures [47, 48, 50–56, 94] include orbital reconstruction surgery [48, 53, 54], jaw reconstruction [56] and cleft care [94]. Jacobs and colleagues [48] mention methods such as cranial defect repair, condylar head reconstruction and mandible fracture repair. In the field of otorhinolaryngology, procedures include temporal bone surgery [79–82]. De Souza and co-writers [81] mention other procedures laryngoplasty, middle ear surgery, FESS, subglottic stenosis treatment, labial cleft surgery and septoplasty. Other more specifically surgical procedures of the ear include ortic mastoidectomy, canaloplasty, labyrinthectomy, stapedotomy, tympanostomy and myringotomy, which Leung and colleagues [84] list. Procedures of the urogenital tract involve prostatectomy [99], nephrectomy and laparoscopic partial nephrectomy [98, 102] as well as ureteral stent

placement and kidney transplantation [98].

Within general and plastic surgery, gastroenterologic interventions include hepatic surgery and liver resection, living donor liver transplantation [19, 22, 28], as well as complete mesocolic excision [14]. Procedures found in plastic surgery include breast, bone, nose, ear and skin reconstruction [93]. Radiation oncology procedures include brachytherapy, photon radiotherapy, electron radiotherapy and proton radiotherapy [44–46].

Materials can be categorised into 5 classes: polymers, metals, ceramics, organic materials and composite materials. In the class of polymers the following materials were found: ABS [1, 8, 37, 38, 45, 48, 61, 64, 79, 88, 90, 105], clear resin [103, 106], HIPS [79, 80, 84], latex resin [12], nylon [24, 28, 77, 105], PA [11, 28, 81, 92], PS [92], PET-G [25, 27, 77, 106], PCL [83, 84], PEEK [77, 92], PHA [25], photopolymer [5, 6, 12, 16, 25, 38, 79, 80, 103–106], PLA [4, 17, 25, 40, 55, 77, 80, 104, 105], PMMA [18, 49, 90, 94], PVS [15, 91], PU [4, 38, 92], PUR [105] and silicone [11, 13, 19, 38, 47, 49, 78, 80, 84]. Organic materials include biocompatible photopolymer [25, 94, 103, 106], gelatin [12, 49], high-acyl gellan gum [38], starch and cellulose powder [104] and wax [94]. Metals comprise CoCr alloy [18, 24, 26] and Titanium [18, 24–26, 49, 68, 77, 90, 92]. Composite material include TCP-PHB [94] and resins combining soft materials, rubber-like material and rigid materials [86]. The last material class of ceramics include HA [20, 85, 94], gypsum powder [81, 92], calcium sulfate hemihydrate powder [80, 81] and acrylic bone cement [43]. Table 1 shows 3DP for non-invasive applications. It was mostly used for pre-operative planning [2, 5, 10, 13, 15, 18, 19, 21, 22, 36, 39, 41, 43, 44, 46–48, 52–54, 56, 57, 60, 61, 63, 64, 67, 69–76, 78, 90, 92, 96, 97, 102, 103]. Other combinations found were pre-operative planning and teaching [3, 4, 7–9, 12, 14, 20, 24, 25, 28, 34, 35, 37, 38, 51, 55, 58, 62, 77, 79, 84, 86, 88, 104], pre-operative planning, teaching and patient counseling [6, 11, 42, 59, 83, 85, 89, 91, 93–95, 98, 99, 101, 105, 106], teaching [1, 29–33, 80–82], pre-operative planning and patient counseling [40, 50, 65, 66, 87, 100] and patient counseling [68].

The top three countries, with most publications originated from, in alphabetical order, are Australia [1, 6, 7, 16, 22, 28, 45, 53, 68, 99, 101–104], China [9, 30, 41, 57, 60, 61, 65, 69, 72, 74, 75, 84, 96, 105, 107] and United States [29, 31, 35, 37–40, 43, 44, 48, 59, 94, 98, 108–110].

Overall, the costs had a broad range for a model from \$ 0.6 - \$5500 per model [1, 6, 23, 29, 37, 40, 48, 68, 84, 89, 91, 99–102, 105, 108, 110, 111] and the printer costs ranged from \$500 - \$200.000 [29, 42, 51, 105]. The manufacturing cost range is \$ 0.73 - \$ 5400 [2, 62] and the material costs range is \$ 1 - \$ 7500 [35, 44, 57]. One study [1] made a cost analysis specific to anesthesia models. One author gave detailed information about the costs of 3DP in medicine [23].

The section time gathers information about reduced operation time, production time and specific print time for an 3DP object. The operation time was reduced by 0.72 - 258 minutes [42, 94]. The time to produce a 3D-printed model was 20 minutes to 9 days [28, 40, 88, 89, 91, 101, 102]. Morgan and colleagues [95] reported a reduction of the operation time by 19.85 %.

Studies reported positive effects on the operation time [3, 4, 20, 24, 41, 43, 56, 57, 60–62, 64, 65, 68–70, 72–75, 78, 89,

90, 95, 96, 99, 112], blood loss [41, 60–62, 64, 65, 69, 70, 73, 75, 95, 96] and fluoroscopy dose [20, 61, 70, 90, 95, 96]. There were reports about less risk of infection [78] and better functional outcomes [24, 41, 52, 60–62, 65, 69, 74, 75, 89, 113]. Authors reported about teaching benefits [31, 80, 105]. A lot of authors point out that more high-quality studies/trials are needed [2, 9, 41, 53, 56, 75, 79, 88, 112, 114]. In addition, these authors conducted meta-analysis [3, 5, 7, 15, 30, 31, 41, 51, 53, 56, 57, 60, 61, 64, 65, 69, 72, 74, 75, 78, 81, 84, 91, 95, 96, 113]. The authors included between 4 to 350 articles. These authors followed the PRISMA guidelines [1, 3, 5–7, 9, 13–19, 22–26, 28, 30–37, 39–45, 47, 49–79, 81–92, 94–106], were registered [4, 14, 16, 40, 47, 51, 53–55, 60, 63, 70, 72, 73, 84, 88, 90, 91, 95, 98, 99] and did a bias assessment [4, 5, 7, 14–18, 23, 29–31, 33, 39–41, 49, 51, 53–57, 60–62, 65, 67, 69, 71, 72, 74–76, 78, 82–84, 86, 90, 96, 97, 99, 100].

### 2.3.2 On-body Applications

In Table 2, reviews are listed about on-body devices or applications (n = 26). On-body devices refer to applications that are in direct contact with the skin, such as prostheses. They include the following medical fields dentistry [18, 115–117], health care engineering [26, 27], general surgery [24, 25], oncology [42], oral and maxillofacial surgery [48, 50, 118], orthopedics [63, 74, 119–125], otorhinolaryngology [78, 83], pediatrics [89], plastic surgery [93] and radiation oncology [44]. The organs or organ systems in this section include the cranium [44, 48, 78], musculoskeletal system [24, 44, 63, 74, 93, 119–125], rectum [42], teeth [18, 115–117] and trachea [124]. In addition Francoise and colleagues [89] mention organ systems such as the craniofacial region, central nervous system, cardio-thoracic system, musculoskeletal system and gastrointestinal and genitourinary tract.

The pathologies in this section include cancer [25, 42, 44, 83], Covid-19 [26, 27], cranio-maxillofacial defects [25, 48, 50, 118], foot abnormalities such as flat feet [120, 121], limb loss [122, 123], neurological disorders [124], tooth loss [18, 115–117], various fracture types such as forearm fractures or tibial plateau fractures [63, 74, 119, 125] and different types of ear disorders [78].

Procedures include dental procedures such as implantation and production of dental crowns or prostheses [18, 116, 117], production of personal protective equipment (PPE) such as face shields [26, 27] and surgical procedures such as total mesorectal excision, craniofacial surgery, upper extremity surgery, amputation, otologic and auricular management, cardiovascular surgery, neurosurgery, transplantation surgery, urological and gastrointestinal procedures, orthopedic surgery [25, 42, 44, 48, 50, 63, 78, 83, 89, 93, 118, 122–124].

Material classes and associated materials include metals such as CoCr [18, 26, 117], NiTi [115] or Ti [18, 26]. Ceramics include zirconia [116]. Within the material class of polymers ABS [25, 48, 118, 124], EVA [120], PLA [25, 27, 42, 78, 83, 119, 121, 122, 125], PA [78], PC [24, 121], PCL [24, 83], PEKK [78, 124], PET-G [25, 27, 121], PHA [25], photopolymer [18, 26, 27, 42, 78, 115], PU [121] and TPE [124] were found. Combined materials include PC-ABS, [42] glass beads, resin and silicone [78]. Lastly organic materials such as starch [24, 125] and wax [24] were identified.

Authors used 3DP as tools for pre-operative planning [18,

44, 48, 63, 74, 78, 118], pre-operative planning and teaching combined [24, 25], planning, teaching and counseling combined [42, 83, 89, 93] and planning and counseling [50]. Countries with the most publications (n = 5) in this section originated from the United States [44, 48, 89, 93, 125]. The cost per model was 69.75 \$ - 5500 \$ [48], the material cost 10 \$ - 980 \$ [122] and the production cost 0.73 \$ - 4043 \$ [78, 89]. The production time had a wide range from 0:20 h - 5 d [78, 125] and concerning the operation time the reduction was from 5.7 m - 63 m in the OR [24]. It was reported that 3DP costs less than conventional methods and that a more personalized fit for the prostheses was possible with this technology [122]. These authors conducted an additional meta-analysis [18, 74, 78, 116, 117] The included papers ranged from 5 - 158. Concerning the study quality, the following authors followed the PRISMA guidelines [18, 24–26, 42, 44, 50, 63, 74, 78, 83, 89, 115–118, 120–125], did a bias assessment [18, 25, 74, 78, 83, 115, 117, 120, 121, 125] and were registered [63, 116, 125].

### 2.3.3 Invasive and Non-permanent Applications

Table 3 is sorted according to the medical field (n = 42). The medical fields are dentistry [126, 127], general surgery [20, 21, 24, 25] health care engineering [26], neurosurgery [38, 128–131], oncology [42, 43], oral and maxillofacial surgery [47–50, 52, 53, 55, 56], orthopedics [57–59, 63, 67, 68, 73, 77, 132–134], otorhinolaryngology [78, 79, 83], pediatrics [85, 89, 90, 92] and radiation oncology [44, 46].

The affected organs or body parts are the brain [38], cardio-thoracic system [89], central nervous system [89], cranium [25, 48–50, 52, 53, 55, 56, 78, 83, 132], ear [78, 79, 132], eye [132], female internal genitals [44, 46], gastrointestinal system [89], genitourinary tract [89], jaw [25, 47–50, 56, 126], liver [25, 44], musculoskeletal system [20, 21, 24, 25, 43, 57, 58, 63, 67, 73, 90, 133], neck [44, 78, 83, 132], rectum [42], soft tissue [24, 25, 44], spine [25, 38, 59, 68, 77, 92, 128–131, 134], teeth [21, 126, 127] and upper and lower respiratory tract [85].

The pathologies included cancer [21, 25, 42–44, 46, 55, 77, 83, 130], COVID-19 [26], craniofacial defects [47, 48, 53, 56], different fracture types [57, 58, 63, 67, 73, 132], ear and hearing disorders [78], musculoskeletal malformations [21, 67, 68, 133], neurologic disorders [21, 25, 38], respiratory disorders [21, 79, 85], spinal disorders [59, 68, 92, 128, 129, 134] and tooth loss [126, 127].

Procedures include brachytherapy [44, 46], cerebrovascular surgery [38], colorectal surgery techniques, such as transanal total mesorectal excision, total mesorectal excision, laparoscopic resection [42], craniomaxillofacial surgery [20, 48–50, 52, 53, 56, 79, 83], guides for dental implants [126], orthopedic procedures on the musculoskeletal system [25, 47, 55, 57, 58, 63, 67, 73, 133], orthopedic surgery, cardiovascular surgery, neurosurgery, transplantation surgery, urological and gastrointestinal procedures, dental and craniofacial procedures [89, 90], otologic and auricular management surgery [78], production of medical equipment [26], spinal surgery [25, 38, 68, 77, 92, 128, 129, 131, 134], thoracic airway reconstruction techniques, such as aortopexy or slide tracheoplasty [85] and tooth transplantation [127].

In the material class of polymers ABS [38, 46, 48, 52, 55, 59, 77, 79, 90, 130, 132], HDPS [77], HIPS [25], liquid resin [26],

nylon [26, 55], PA [26, 42, 47, 67, 92, 130], PC [42, 46], PCL [78, 83, 85], PDMS [49], PEEK [49, 73, 77, 92], PEI [26, 46, 55], PEKK [78, 85], PETG [25, 55, 77], PHA [25], photopolymer [24, 26, 38, 42, 47, 59, 78, 132], PLA [26, 38, 42, 46, 55, 67, 77, 78], PMMA [20, 25, 90], PPSF [46], PS [68, 92], PU [52, 68], silicone [38, 47, 52] and TPU [25] were found. In the material class of ceramics acrylic bone cement [43], HA [20, 85] and plaster [67, 68] were found.

The material class of metals includes CrCoMo [24, 25], metal [26, 126], SiCaP [59], stainless steel [59] and Ti [20, 26, 49, 59, 90]. The material class of organic materials includes bio-resorbable PU [77], calcium sulfate hemihydrate [55, 59], cast powder and bonding agent [55] and wax [24]. Lastly composite materials include PC-ABS [42].

Concerning the applications, 3DP is used for only planning [21, 43, 44, 46–49, 52, 53, 56, 57, 63, 67, 68, 73, 78, 90, 92, 126, 127, 130, 133, 134], planning and teaching together [20, 24, 25, 38, 55, 58, 77, 79], planning and counseling [50] and planning, teaching and counseling together [42, 59, 83, 85, 89].

The most reviews found in this section are from the United States [38, 43, 44, 46, 48, 49, 59, 85, 89, 92, 130, 132, 133].

The corresponding costs for the different categories are listed as follows: material 11.77 \$ - 3846.30 \$ [92], model cost: 20 \$ - 5500 \$ [48, 130] software: 15.000 \$ - 30.000 \$, printer: 120.000 \$ [67] and manufacturing cost: 0.73 \$ - 4043 \$ [78, 89].

Regarding time, a reduction in operating time of 10 minutes to 258 minutes was reported [59, 132] and a reported production time range of 5 hours to 5 days [68]. These studies conducted an additional Meta-Analysis [53, 56, 57, 78, 128–131, 134]. The included papers by the authors in this section ranged from 6 - 350.

Regarding the study quality, these authors followed the PRISMA guidelines [24–26, 42–44, 47, 49, 50, 52, 53, 55–59, 63, 67, 68, 73, 77–79, 83, 85, 89, 90, 92, 126–134]. Conducted a bias assessment [49, 53, 55–57, 67, 78, 83, 90, 126–129, 131, 133, 134] and were registered [47, 53, 55, 63, 73, 90, 126].

The following authors conducted an additional Meta-Analysis Murray-Douglass *et al.* [53], Serrano *et al.* [56], Cao *et al.* [57], Omari *et al.* [78], Azimi *et al.* [128], Yu *et al.* [129], Wallace *et al.* [130], Liang *et al.* [131], and Lu *et al.* [134]

### 2.3.4 Invasive and Permanent Applications

In Table 4 invasive permanent applications are listed (n = 35). The medical fields are dentistry [18, 115, 116, 135–137], general surgery [20, 21, 24, 25], neurosurgery [36, 38, 138], oncology [43], oral and maxillofacial surgery [48–50, 53, 55, 56, 139], orthopedics [57, 63, 68, 77, 114, 140, 141], otorhinolaryngology [78, 79, 83], pediatrics [89], plastic surgery [93, 94] and vascular surgery [103].

The affected organs include the teeth [18, 115, 116, 135–137], cranium [25, 36, 48–50, 53, 55, 56, 78, 79, 83], jaw [25, 48–50, 56, 94, 136, 139], ear [78, 79, 83], spine [38, 43, 68, 77, 138, 140] and different parts of the musculoskeletal system [20, 21, 24, 25, 43, 89, 141].

Pathologies found in this section, in alphabetical order are aneurysm [20, 38, 103], cancer [25, 38, 43, 55, 77, 83, 130, 138, 141], craniofacial defects [25, 36, 48–50, 53, 56, 139], diseases of different organ systems, including nervous, circulatory, respiratory, gastrointestinal, skin and muscular-skeletal [20,

21, 25], musculoskeletal diseases [20, 57, 63, 135], otologic diseases such as deafness or kimura's disease [78, 79], spinal disorders [25, 38, 68, 77, 79, 138, 141] and tooth loss [18, 115, 116, 136, 137].

Procedures in this section found are aneurysm repair [38, 103], crano-maxillofacial surgery [20, 36, 48–50, 53, 55, 56, 79, 94, 115, 139] such as mandibular resection or reconstruction [83]. Further procedures are ENT surgery [78], implantation of dental crowns and prostheses [18, 116], orthopedic surgery [57, 63] such as total hip and knee arthroplasty [114]. In pediatrics, orthopedic surgery, cardiovascular surgery, neurosurgery, transplantation surgery, urological and gastrointestinal procedures, and dental and craniofacial procedures were found [89]. Further procedures include plastic reconstruction surgery on the breast or nose, ear cartilage and skin [93]. The last procedure found in this section includes spinal surgery [25, 68, 77, 138].

In terms of materials, they are listed by class: polymers, ceramics, metals, organic materials and composite materials. Polymers found are ABS [24, 48, 77, 79], HDPS [77], MMA [94], Nylon [24, 55, 78], PA [24, 25, 78], PBS [24], PC [20, 24, 49], PCL [24, 25, 78, 83, 93], PEEK [18, 20, 24, 25, 77, 79, 138], PEKK [78, 115, 140], PETG [24, 55, 77], photopolymer [20, 38, 55, 78, 94, 103], PLA [24, 25, 36, 55, 77, 103], PMMA [18, 24, 103], PP [20, 24, 78], PS [24, 68], resin [24, 49, 55, 78], silicone [24, 78, 94], TPU [25, 78] and zirconia [18, 116, 136]. In the material class of ceramic materials calcium phosphate [49], cast powder and bonding agent [55], HA [20, 24, 94], opaque [55] and plaster [24, 68] were found. With the material class of metals CoCr [18, 136, 137], Ti [18, 20, 24, 135, 140, 141] and NiTi [115] were derived from the papers. Organic materials include starch [24], wax [24, 94], fibrinogen [49], gelatin [49], and bio-resorbable PU [77]. The only compound material found in this section was TCP-PHB [94]. 3DP was used for pre-operative planning [18, 21, 36, 43, 48, 49, 53, 56, 57, 63, 68, 78, 103, 114, 139], pre-operative planning and patient counseling [50], pre-operative planning and teaching [20, 24, 25, 38, 55, 77, 79] and planning, teaching and patient counseling combined [83, 89, 93, 94].

In this section Australia was found to be the leading country with publications from [53, 68, 103, 138]. The costs found for the following materials are PMMA: 80 \$ - 800 \$, HA: 7900 \$, Ti:25 \$ - 100 \$ [36]. Concerning the manufacturing cost a range from 0.73 \$ to 4043 \$ was found [78, 89]. The model cost range from 11.43 \$ - 5500 \$ [48, 94].

Concerning time the operation time was reduced by [24, 79] 5.7- 120 minutes and the manufacturing time was 0.20 h - 5 days [68, 78]. The 3D-printed implants seem to have acceptable accuracy [57, 89] and using the technology leads to less surgical time [57, 68, 89].

These authors conducted an additional Meta-Analysis [18, 53, 56, 57, 78, 116, 137].

The range of papers included by the authors is between 9 and 350. Furthermore, most studies followed the PRISMA guidelines [18, 24, 25, 36, 43, 49, 50, 53, 55–57, 63, 68, 77–79, 83, 89, 94, 103, 114–116, 137–139, 141]. Additionally these authors conducted a Bias Assessment [18, 49, 53, 55–57, 63, 78, 83, 115, 136, 137, 139, 140] and were registered [53, 55, 63, 116, 137].

Table 1: Systematic Reviews of Non-Invasive Applications.

| Author                       | Medical Field | Organ                                                  | Path.                                                                                                                       | Procedure                                                                                                                                        | Material                                                          | APPL | RGN | Costs \$                                                        | Time                                                                                                                         | Conclusion                                                                                                                                                                                                                                                                                                                           | MA  | IP  | KW                                                                                                                                              | Study Quality |
|------------------------------|---------------|--------------------------------------------------------|-----------------------------------------------------------------------------------------------------------------------------|--------------------------------------------------------------------------------------------------------------------------------------------------|-------------------------------------------------------------------|------|-----|-----------------------------------------------------------------|------------------------------------------------------------------------------------------------------------------------------|--------------------------------------------------------------------------------------------------------------------------------------------------------------------------------------------------------------------------------------------------------------------------------------------------------------------------------------|-----|-----|-------------------------------------------------------------------------------------------------------------------------------------------------|---------------|
| Chao <i>et al.</i> [1]       | Anaesthesia   | Trachea, Tracheobronchial Tree, Thoracic Spine Segment | Tracheo-bronchomalacia, spinal deformity                                                                                    | Trainers for neuroaxial needling, surgical airway trainer, tracheostomy, bronchoscopy, lung isolation trainer                                    | ABS, photopolymer resin                                           | T    | AU  | Model: 1-19, printer: 380 - 7800                                | N/A                                                                                                                          | 380 - 7800 \$ printer, Tracheostomy, bronchoscopy and lung isolation trainers printed for 1 \$, Neuraxial needling trainer 19 \$, Surgical airway trainer 5 \$, 3DP used for training in anaesthesia cost less.                                                                                                                      | no  | 8   | 3DP, airway, anatomical model, education, simulation                                                                                            | PRISMA        |
| Tuncay <i>et al.</i> [8]     | Cardiology    | Heart, Aortic Valve                                    | Aortic valve stenosis                                                                                                       | Transcatheter aortic valve replacement, transcatheter mitral valve replacement, trans-apical aortic valve replacement, mitral valve intervention | ABS, photopolymer resin                                           | PT   | NL  | Manufacturing cost: high                                        | Production time: 0.5 h - 3 d                                                                                                 | Medical 3DP, CT most used imaging method, popular materials are ABS and TangoPlus FullCure, SLA and FDM are preferred printing techniques, PolyJet and laser sintering are used less frequently, printing times 30 minutes to 3 days, main application is preoperative planning, training, device testing, and procedure evaluation. | no  | 29  | Heart valves, Printing (three-dimensional), Stereolithography, Tomography (x-ray computed), Ultrasonography                                     | N/A           |
| DeCampos <i>et al.</i> [5]   | Cardiology    | Heart                                                  | Cardiovascular disease                                                                                                      | Left atrial appendage closure                                                                                                                    | Photopolymer                                                      | P    | PT  | Material: 150 - 250                                             | Production time: model: 1 h, small heart model: 0.5 h, full heart model: 3 d, segmentation time: 1 h, engineering time : 3 h | 3DP together with imaging in left atrial appendage closure (LAAC) significantly reduces the risk of device sizing inconsistencies and leakage compared to an imaging-only approach, results suggest that 3DP can help improve the accuracy and outcomes of LAAC device sizing.                                                       | yes | 8   | 3DP, Left atrial appendage closure, Peridevice leaks                                                                                            | PRISMA, NOS   |
| Illii <i>et al.</i> [11]     | Cardiology    | Heart                                                  | Cardiovascular disease                                                                                                      | Left atrial appendage closure                                                                                                                    | Silicone, PA, PU                                                  | PTC  | CH  | FDM printer and material : low cost, polyjet printer: high cost | N/A                                                                                                                          | Imaging methods used to produce 3DP heart models are CMR, CCT, models provide sufficient anatomical accuracy for clinical applications such as planning, guiding and personalizing cardiovascular methods.                                                                                                                           | no  | 212 | 3D printing, additive manufacturing, cardiovascular disease, patient-specific phantoms, personalized medicine, silicone casting, voxel printing | N/A           |
| Bernhard <i>et al.</i> [3]   | Cardiology    | Heart                                                  | Congenital heart disease, left atrial appendage occlusion, aortic disease, hypertrophic cardiomyopathy                      | Mitral valve repair or replacement, transcatheter aortic valve implantation                                                                      | N/A                                                               | PTC  | CH  | Models of multi-material: 2500                                  | Reduced operation time                                                                                                       | 3DP used to treat left atrial appendage, aortic disease, assessing complex anatomy, limitations are poor tissue mimicry and neglect of physiological properties, reduces intervention time in occlusion surgery, aiding planning and guidance, potentially lowering radiation exposure and ventilation times, more evidence needed.  | yes | 107 | 3DP, Additive manufacturing, Cardiovascular intervention, Patient-specific phantoms, Personalised medicine                                      | PRISMA        |
| Batteux <i>et al.</i> [2]    | Cardiology    | Heart                                                  | Congenital heart disease                                                                                                    | Intracardiac repair, surgical or catheter-based procedures                                                                                       | N/A                                                               | PT   | FR  | Software: 10.000                                                | Reduced operation time, reduced ventilation and ICU time                                                                     | 3DP technology valuable for understanding complex congenital heart defects, guiding surgical planning, further studies required.                                                                                                                                                                                                     | no  | 29  | 3D technology, accuracy, congenital heart disease, printed models, reliability, segmentation, surgical planning                                 | N/A           |
| Tarabanis <i>et al.</i> [12] | Cardiology    | Heart                                                  | Congenital heart disease                                                                                                    | Left atrial appendage occlusion, transcatheter-based procedure                                                                                   | Photopolymer, gelatin, silicon, latex resin, rubber like material | PT   | US  | Model: 15 - 100, printer: 200.000                               | Reduced fluoroscopy time                                                                                                     | Used for 3DP models of left atrial appendage occlusion (LAAO), better sizing accuracy, decrease number of devices per procedure, fluoroscopic exposure, peri-device leaks.                                                                                                                                                           | no  | 19  | 3D printing, left atrial appendage occlusion                                                                                                    | N/A           |
| Lau <i>et al.</i> [6]        | Cardiology    | Heart                                                  | Congenital heart disease                                                                                                    | Cardiac surgery                                                                                                                                  | Photopolymer                                                      | PTC  | AU  | Manufacturing cost: 55 - 810                                    | Segmentation time: 0.5 h - 12 h                                                                                              | Patient-specific 3D printed heart models accurately replicate complex anatomy, aiding understanding, preoperative planning, and medical education. Costs range from \$55 to \$810. They are valuable tools in congenital heart disease.                                                                                              | no  | 28  | 3DP, congenital heart disease, model, simulation                                                                                                | PRISMA        |
| Celi <i>et al.</i> [10]      | Cardiology    | Heart                                                  | Congenital heart disease, aneurysm, non-valvular atrial fibrillation, valvular heart disease, calcific aortic valve disease | Left atrial appendage closure, transcatheter aortic valve replacement                                                                            | Rubber-like material, photopolymer                                | P    | IT  | N/A                                                             | Printing time: 4 h 25 m - 54 h 25 m                                                                                          | Technique reliable with 3D image data (CTA, CMR, 3D echography), need for expert operators for image segmentation and mesh refinement, interventional planning, further studies needed.                                                                                                                                              | no  | N/A | 3D printing, cardiology, congenital heart disease, structural heart disease, virtual model                                                      | N/A           |

continued

| Author                            | Medical Field                     | Organ                                                                                | Path.                                                                                                                                                                                                                                                                                                                                                     | Procedure                                                                                  | Material                                                     | APPL | RGN | Costs \$                                  | Time                                   | Conclusion                                                                                                                                                                                                                                                                                                                                          | MA  | IP | KW                                                                                                                    | Study Quality              |
|-----------------------------------|-----------------------------------|--------------------------------------------------------------------------------------|-----------------------------------------------------------------------------------------------------------------------------------------------------------------------------------------------------------------------------------------------------------------------------------------------------------------------------------------------------------|--------------------------------------------------------------------------------------------|--------------------------------------------------------------|------|-----|-------------------------------------------|----------------------------------------|-----------------------------------------------------------------------------------------------------------------------------------------------------------------------------------------------------------------------------------------------------------------------------------------------------------------------------------------------------|-----|----|-----------------------------------------------------------------------------------------------------------------------|----------------------------|
| Boll <i>et al.</i> [4]            | Cardiology                        | Heart, Aortic Valve, Mitral Valve, Tricuspid Valve                                   | Congenital malformations, dilated cardiomyopathy, bacterial endocarditis, mitral valve regurgitation, tissue infection, hypertension, diabetes mellitus, chronic kidney disease, dyslipidemia, atrial fibrillation, epilepsy, thalassemia minor, monoclonal gammopathy, severe degenerative aortic stenosis, Aortic valve stenosis, after coronary artery | Cardiac surgery                                                                            | Rubber-like urethane, photosensitive resin, plaster, PLA, PU | PT   | BR  | N/A                                       | Reduced operation time                 | 3DP model good to plan the surgical procedure and choose the best material, size, format, and thickness to be used, reduced surgery time, exposure, lower risk of infection.                                                                                                                                                                        | no  | 13 | Heart Valves, Printing, Three-Dimensional, Cardiovascular Surgical Procedures                                         | RoB 2, PROSPERO            |
| Lau <i>et al.</i> [7]             | Cardiology                        | Heart                                                                                | bypass grafting (CABG), atrial fibrillation, malignant tumor and ventricular aneurysm                                                                                                                                                                                                                                                                     | Cardiac surgery                                                                            | N/A                                                          | PT   | AU  | N/A                                       | N/A                                    | 3DP models are dimensionally accurate, and enhance learning and satisfaction, Meta-analysis for pre-op planning not have possible data limitations, 3DP models aid complex CHD pre-op planning, comprehensive cost-benefit analysis of 3DP in cardiovascular surgery needed in future research.                                                     | yes | 24 | 3D model, 3DP, additive manufacturing, congenital heart defect, congenital heart disease, stereolithography           | PRISMA, OHAT               |
| Xenofontos <i>et al.</i> [13]     | Cardiology                        | Aorta, Prosthetic Mitral Valve, LVOT, Valve Leaflets, Left Ventricular Outflow Tract | Congenital heart disease                                                                                                                                                                                                                                                                                                                                  | Transcatheter aortic valve replacement                                                     | Photosensitive resin, silicone, PU                           | P    | GB  | Model: 150 - 200                          | Production time: 1 h - 5 h             | Technology used to print models, and pre-operative planning but not yet mature for clinical practice.                                                                                                                                                                                                                                               | no  | 13 | Additive Manufacturing, Rapid Prototyping, Transcatheter aortic valve implantation, TAVI, SAVR                        | PRISMA                     |
| Wang <i>et al.</i> [9]            | Cardiology                        | Heart                                                                                | Aortic stenosis                                                                                                                                                                                                                                                                                                                                           | Transcatheter mitral valve replacement, three-dimensional transesophageal echocardiography | N/A                                                          | PT   | CN  | N/A                                       | Production time: 1.5 h - 12 h          | 3DP aids cardiovascular surgery, teaching, and planning, more trials needed.                                                                                                                                                                                                                                                                        | no  | 43 | Three-dimensional (3D) printing, adult, cardiovascular surgery, intervention                                          | PRISMA                     |
| Bakdach <i>et al.</i> [15]        | Dentistry                         | Teeth                                                                                | Tooth loss                                                                                                                                                                                                                                                                                                                                                | Bracket positioning                                                                        | PVS                                                          | P    | SY  | Manufacturing cost: higher                | Reduced chair time, increased lab time | 3DP trays have good occur, error in buccolingual direction and maximum angulation error in the torque.                                                                                                                                                                                                                                              | yes | 7  | Bracket positioning, CAD-CAM, Indirect bonding, Three dimensional-printing, Transfer accuracy                         | PRISMA, RoB 2, ROBINS-I    |
| Thakur <i>et al.</i> [18]         | Dentistry                         | Teeth                                                                                | Tooth loss                                                                                                                                                                                                                                                                                                                                                | Implantation of fixed partial dentures, single implant crowns                              | CoCr, PMMA, Ti, zirconia                                     | P    | IN  | N/A                                       | N/A                                    | Implant-supported framework for dental implants produced by AM and SM, marginal fits are in an acceptable clinical range.                                                                                                                                                                                                                           | yes | 9  | Accuracy, Computer aided design/computer aided manufacturing, Metal framework, Removable partial denture, 3D printing | PRISMA, MINORS             |
| Etemad-Shahidi <i>et al.</i> [16] | Dentistry                         | Teeth                                                                                | Tooth loss                                                                                                                                                                                                                                                                                                                                                | N/A                                                                                        | ABS, PLA, photopolymer                                       | N/A  | AU  | N/A                                       | N/A                                    | Certain printers low errors, recommended for dental applications that require high accuracy models, layer thickness, base design, postprocessing and storage can influence accuracy, high risk of bias, lack of standardized testing.                                                                                                               | no  | 28 | 3DP, fixed dental prosthesis, marginal fit, meta-analysis, metal, reliability, systematic review                      | PRISMA, PROSPERO, QUADAS-2 |
| Tsolakis <i>et al.</i> [17]       | Dentistry                         | Jaw, Teeth                                                                           | Tooth loss                                                                                                                                                                                                                                                                                                                                                | N/A                                                                                        | PLA, ABS                                                     | N/A  | GR  | N/A                                       | N/A                                    | Accuracy 3DP dental cast can be influenced by used technology, design and materials, accuracy is not affected by the layer height and the position of the model on the building template.                                                                                                                                                           | no  | 11 | 3-dimensional printing, accuracy, additive manufacturing, dental models, full-arch, systematic review                 | PRISMA, ACROBAT-NRSL, OSF  |
| Witowski <i>et al.</i> [19]       | General Surgery                   | Liver                                                                                | Tooth loss                                                                                                                                                                                                                                                                                                                                                | Liver resection, living donor liver transplantation                                        | Silicone, jellywax                                           | PTC  | PL  | Models of hepatic vessels: 30 - 4000      | Production time: long                  | The technology used to produce 3DP models for pre-surgical planning anatomical teaching and patient education helps intraoperative guidance but it is still limited by high costs and availability of technological resources.                                                                                                                      | no  | 14 | 3D techniques, autotransplantation, rapid prototyping, template, three-dimensional, tooth transplantation             | PRISMA                     |
| To <i>et al.</i> [14]             | Coloproctology, Surgical Training | Rectum, Superior Mesenteric Vessel                                                   | Liver disease                                                                                                                                                                                                                                                                                                                                             | Colorectal surgery, complete mesocolic excision                                            | TPU, PLA, resin, silica gel                                  | PT   | AU  | Model of anorectal fistula: 2.93 - 285.48 | Production time: 138 m - 23 h          | Planning colorectal surgery with 3DP models, reduces operative time, surgical time and reduces intraoperative blood loss, 3DP models were used as educational tool and were well accepted by medical students.                                                                                                                                      | no  | 5  | 3D printing, liver surgery, preoperative planning, simulation, training models                                        | PRISMA, PROSPERO, NOS      |
| Perica <i>et al.</i> [28]         | Hepatology                        | Liver                                                                                | N/A                                                                                                                                                                                                                                                                                                                                                       | N/A                                                                                        | PA, PLA, resin, nylon, photopolymer                          | PT   | AU  | Model: 13 - 2000                          | Production time: 11 - 100 h            | 3DP liver models offer high accuracy in replicating hepatic anatomy and tumors, making them valuable tools for surgical planning, procedure simulation, medical education, and training, cost ranges from \$ 13 to \$ 2000, with production taking up to 100 hours, usefulness in clinical applications, for treatment of malignant hepatic tumors. | no  | 19 | 3D models, Colorectal surgery, Surgical education, Simulation training                                                | PRISMA                     |
| Fahimian <i>et al.</i> [46]       | Radiation Oncology                | Female Internal Genitals                                                             | Liver disease, hepatocellular carcinoma                                                                                                                                                                                                                                                                                                                   | Brachytherapy                                                                              | PLA, PC, PPSF, PEI, ABS,                                     | P    | US  | Printer: low cost                         | N/A                                    | 3DP in gynecological Brachytherapy has witnessed rapid growth since 2014, this has as significantly improved the customization of applicator and template designs, marking progress in the precision and methodology of implantation and delivery.                                                                                                  | no  | 29 | Hepatic tumor, Model, Simulation, Surgical planning, Three-dimensional printing                                       | N/A                        |
| Rzeszuto <i>et al.</i> [27]       | Health Care Engineering           | N/A                                                                                  | Cancer                                                                                                                                                                                                                                                                                                                                                    | Production of PPE                                                                          | PLA, ABS, PETG, Green-TEC PRO based on lignin                | N/A  | PL  | N/A                                       | N/A                                    | Technology used to produce PPE, has great potential to produce lacking equipment, AM not suitable for high-volume production.                                                                                                                                                                                                                       | no  | 34 | 3D printing, Additive manufacturing, Brachytherapy, Gynecological, Cervical, Endometrial, HDR, LDR                    | N/A                        |

continued

| Author                         | Medical Field            | Organ                                                                                                                | Path.                                                                                                                                                                                | Procedure                                                                                                                                                                                                                                                                                 | Material                                                                  | APPL | RGN | Costs \$                                   | Time                   | Conclusion                                                                                                                                                                                                                                                                                                                                                                                    | MA  | IP | KW                                                                                                                                     | Study Quality  |
|--------------------------------|--------------------------|----------------------------------------------------------------------------------------------------------------------|--------------------------------------------------------------------------------------------------------------------------------------------------------------------------------------|-------------------------------------------------------------------------------------------------------------------------------------------------------------------------------------------------------------------------------------------------------------------------------------------|---------------------------------------------------------------------------|------|-----|--------------------------------------------|------------------------|-----------------------------------------------------------------------------------------------------------------------------------------------------------------------------------------------------------------------------------------------------------------------------------------------------------------------------------------------------------------------------------------------|-----|----|----------------------------------------------------------------------------------------------------------------------------------------|----------------|
| Ibrahim <i>et al.</i> [26]     | Health Care Engineering  | N/A                                                                                                                  | COVID-19                                                                                                                                                                             | Production of PPE and medical equipment                                                                                                                                                                                                                                                   | PA, ABS, PLA, Ti, CoCr, Liquid resin, nylon, photopolymer, plastic, metal | N/A  | GB  | N/A                                        | N/A                    | Technology used to produce personal protective equipment, adjuncts for ventilation, ventilator equipment, and patient care such as nasal swabs in time of Covid-19 crisis.                                                                                                                                                                                                                    | no  | 13 | COVID-19, personal protective equipment, three-dimensional printing                                                                    | PRISMA         |
| Tenewitz <i>et al.</i> [29]    | Interventional Radiology | Bladder, Pelvicallyceal System, Kidney                                                                               | COVID-19                                                                                                                                                                             | Ultrasound guided vein identification puncture and canalization, arterial identification, puncture and canalization, biopsy and tissue sampling, CT guided biopsy and tissue sampling, CT guided catheter placement, fluoroscopic guided non-vascular procedures, endovascular simulation | N/A                                                                       | T    | US  | Model: 170 - 5400, printer: 6000 - 750.000 | N/A                    | Printers 6000-750,000 \$, biliary simulation materials 170 \$, lumbar spinal simulation 5400 \$, femoral access model 647 \$. In interventional radiology, 3DP aids simulation-based trainee education, necessitating further research and integration, including meta-analysis for predictive validity evaluation.                                                                           | no  | 4  | 3D printing, additive manufacturing, COVID-19, PPE, ventilators, infection control                                                     | QUADAS         |
| Salazar <i>et al.</i> [33]     | Medical Education        | Child Cleft Lip and Palate, Acetabulum, Orbita, Knee, Skull, Atlas, Heart, Shoulder, Thigh, Liver, Upper Limb, Heart | Urethrovscial anastomosis, percutaneous nephrolithotomy                                                                                                                              | N/A                                                                                                                                                                                                                                                                                       | N/A                                                                       | T    | US  | N/A                                        | N/A                    | Students using 3DP models for studying anatomy, scored better in objective assessment test.                                                                                                                                                                                                                                                                                                   | yes | 10 | High fidelity training, Interventional radiology, Simulation training, Three-dimensional printing                                      | PRISMA, STROBE |
| Fleming <i>et al.</i> [31]     | Medical Education        | Cranium, Brain, Knee, Bone, Pelvis, Spine, Heart, Acetabulum                                                         | Hepatic disease, heart disease                                                                                                                                                       | N/A                                                                                                                                                                                                                                                                                       | N/A                                                                       | T    | US  | Manufacturing cost: low                    | Production time: fast  | 3DP models positively impact medical students especially given their limited fund of knowledge in anatomy, more trials are required to evaluate the usefulness.                                                                                                                                                                                                                               | yes | 11 | 3D printing, Anatomical model, Student, Education                                                                                      | PRISMA, RoB 2  |
| Brumpt <i>et al.</i> [32]      | Medical Education        | Larynx, Cranium, Heart, Upper Limb, Pelvis, Knee, Spine, Heart, Abdomen, Thorax                                      | N/A                                                                                                                                                                                  | N/A                                                                                                                                                                                                                                                                                       | PLA, ABS, photopolymer, gypsum-like plaster and binder                    | T    | FR  | Model: 1.25 - 2800                         | Production time: long  | In 3D-printed anatomical models in teaching, the cephalic region was the most studied, 3DP models seem to be feasible and effective for teaching anatomy, advantages are good visual and haptic qualities, reproducibility, and time savings, disadvantages are related to design consistency, printing time, and cost.                                                                       | no  | 68 | 3-D printing, Anatomy education, medical student, meta-analysis, systematic review                                                     | PRISMA         |
| Ye <i>et al.</i> [30]          | Medical Education        | Cranium, Colon, Rectum, Pelvis, Spine, Heart, Lung, Lower Limb                                                       | N/A                                                                                                                                                                                  | N/A                                                                                                                                                                                                                                                                                       | N/A                                                                       | T    | CN  | Manufacturing cost: low                    | N/A                    | 3DP better answering time, anatomical knowledge, 3DP group not better than other, results could be influenced by study quality.                                                                                                                                                                                                                                                               | yes | 17 | Anatomy, Learning, Review, Teaching, 3D printing                                                                                       | PRISMA, GRADE  |
| Lan- gridge <i>et al.</i> [34] | Medical Education        | Cranium, Ear, Nose, Throat, Liver, Esophagus, Lung, Heart                                                            | N/A                                                                                                                                                                                  | Surgical training in otorhinolaryngology, neurosurgery                                                                                                                                                                                                                                    | N/A                                                                       | PT   | GB  | Model: low cost                            | Reduced operation time | Usage of 3DP models in training and education, anatomical education and preoperative planning, improved patient outcomes.                                                                                                                                                                                                                                                                     | no  | 49 | Anatomy, Medical education, Three-dimensional printing                                                                                 | PRISMA         |
| McGuire <i>et al.</i> [37]     | Neurosurgery             | Brain                                                                                                                | N/A                                                                                                                                                                                  | Open Vascular, endovascular, neurosurgery                                                                                                                                                                                                                                                 | ABS, photopolymer                                                         | PT   | US  | Model: 624.83                              | N/A                    | 3DP benefits are accurate anatomical models improve resident learning and operative planning in Vascular Neurosurgery, potential for wider training integration as technology advances and costs decline.                                                                                                                                                                                     | no  | 27 | 3-dimensional printing, Medical Knowledge, Practice-Based Learning and Improvement, assessment, education, surgery, teaching, training | PRISMA         |
| Blohm <i>et al.</i> [35]       | Neurosurgery             | Brain, Spine                                                                                                         | Aneurysm                                                                                                                                                                             | Laminectomy, cranial surgery, tumor resections, cerebrovascular surgery                                                                                                                                                                                                                   | N/A                                                                       | PT   | US  | Model and printer : low cost               | N/A                    | 3DP in neurosurgery includes various areas: aneurysm, spine, craniostyostosis, transspenoidal, craniotomy, skull base and tumor. Significance on brain and vascular surgery, especially aneurysm clipping. Cranial and tumor surgeries are highly discussed. Limited focus on spine surgery. Positive resident outcomes noted.                                                                | no  | 40 | 3DP, Cerebrovascular, Endovascular, Simulation                                                                                         | PRISMA         |
| Waqas <i>et al.</i> [39]       | Neurosurgery             | Brain, Cerebrovascular System                                                                                        | Aneurysm, cranial tumor                                                                                                                                                              | Thrombolysis                                                                                                                                                                                                                                                                              | ABS, PC, PLA, photopolymer, molding silicone, stereocool                  | P    | US  | N/A                                        | N/A                    | Thrombolysis in cerebral infarction, post-thrombectomy flow restoration, photopolymer material for patient-specific vascular models, reconstructions of the circle of Willis, anterior and posterior circulation, extracranial vasculature, different circulation systems were used, and outcomes of thrombolysis, flow restoration, surgical performance, and qualitative feedback assessed. | no  | 23 | 3DP, Graduate medical education, Neurosurgery, Residency education, Simulation, Training                                               | PRISMA, MESH   |
| Randazzo <i>et al.</i> [38]    | Neurosurgery             | Spine, Brain                                                                                                         | Arthrodesis, ewing sarcoma, primary bone tumor, sacral chordoma, spondylotic myelopathy, degenerative scoliosis, infectious spondylitis, chondrosarcoma, degenerative lumbar disease | Aneurysm clipping, transnasal sphenoid endoscopy, cerebrovascular surgery, spinal functional surgery                                                                                                                                                                                      | PLA, ABS, photopolymer, liquid urethane, high-acyl gellan gum             | PT   | US  | N/A                                        | N/A                    | Anatomically accurate methods models, surgical planning, simulation and training, tissue-engineered implants, and secondary devices.                                                                                                                                                                                                                                                          | no  | 36 | 3DP, Additive manufacturing, Custom made, Implant, Patient-specific, Spine surgery                                                     | N/A            |

continued



| Author                        | Medical Field                  | Organ                                                                           | Path.                                                                                 | Procedure                                                                                                                    | Material                                                                                | APPL | RGN | Costs \$                                                                                                | Time                                               | Conclusion                                                                                                                                                                                                                                                                                                                                                                                                                           | MA  | IP  | KW                                                                                                                                   | Study Quality                 |
|-------------------------------|--------------------------------|---------------------------------------------------------------------------------|---------------------------------------------------------------------------------------|------------------------------------------------------------------------------------------------------------------------------|-----------------------------------------------------------------------------------------|------|-----|---------------------------------------------------------------------------------------------------------|----------------------------------------------------|--------------------------------------------------------------------------------------------------------------------------------------------------------------------------------------------------------------------------------------------------------------------------------------------------------------------------------------------------------------------------------------------------------------------------------------|-----|-----|--------------------------------------------------------------------------------------------------------------------------------------|-------------------------------|
| Czyżewski <i>et al.</i> [36]  | Neurosurgery                   | Cranium                                                                         | Cerebral aneurysm, tumor, spinal conditions, treatment-resistant neurologic disorders | Cranioplasty                                                                                                                 | PLA, ABS, PET-G, PEEK, PMMA                                                             | P    | PL  | Implant with material: PMMA 80: (for intra-op. molded version), PMMA: 650 - 800, HA: 7900, Ti :25 - 100 | N/A                                                | Technologies used: SLM, SLS, FFF, DLP, and SLA, materials in fabrication: PLA, ABS, PET-G, PEEK, and PMMA, endoprostheses are reliable, and cheaper than the popular counterparts manufactured from polypropylene polyester, PMMA too expensive, PLA price better.                                                                                                                                                                   | no  | 251 | Additive manufacturing, surgical planning, surgical simulation, three-dimensional printing                                           | PRISMA                        |
| Serrano <i>et al.</i> [56]    | Oral and Maxillofacial Surgery | Jaw, Cranium                                                                    | Spinal Deformity                                                                      | Jaw reconstruction                                                                                                           | N/A                                                                                     | P    | FR  | N/A                                                                                                     | N/A                                                | 3DP used for models, surgical guides and implants. Jaw reconstruction with 3DP reduces operating times and enhances aesthetics. However, more high-quality studies are required for confirmation.                                                                                                                                                                                                                                    | yes | 14  | 3DP, Drill guide template, Freehand technique, Pedicle screw, Spinal deformity                                                       | PRISMA, Cochrane Q and Z test |
| Yen <i>et al.</i> [43]        | Oncology                       | Muscles, Spine, Pelvis, Humerus, Calcaneus, Femur, Tibia, Radius, Tibia, Rectum | Maxillofacial Defects                                                                 | N/A                                                                                                                          | Acrylic bone cement                                                                     | P    | US  | N/A                                                                                                     | Operation time: 240 m                              | Pre-operative planning, prosthesis customization, and bioprinting, mainly of challenging tumor locations and proximity to neighbouring neurovascular structures, operative time and follow-up averaged 240 minutes (4 hours) and 25.8 months, safe and efficient method.                                                                                                                                                             | no  | 74  | Additive manufacturing, Clinical outcome, Meta-analysis, Surgery, Systematic review, Three-dimensional printing                      | PRISMA                        |
| Przedlacka <i>et al.</i> [42] | Oncology, Coloproctology       | Colon, Rectum                                                                   | Cancer                                                                                | Transanal total mesorectal excision, total mesorectal excision, laparoscopic resection                                       | PLA, PC-ABS, photopolymer                                                               | PTC  | GB  | N/A                                                                                                     | Printing time: 22 - 40 h                           | 3DP modelling in rectal cancer surgery, preoperative planning, intraoperative navigation, surgical education, device design, models of pelvic anatomy and rectal cancer, useful for vascular anomalies, lymph node dissection, and recurrent cases. Physical and virtual models valuable in education, limitations are segmentation challenges and lack of tissue-mimicking materials.                                               | no  | 16  | Orthopedic oncology, prosthesis, surgical guide, limb salvage procedures, three-dimensional printing                                 | PRISMA                        |
| Emile <i>et al.</i> [40]      | Oncology, Coloproctology       | Colon, Rectum                                                                   | Cancer                                                                                | Colorectal surgery, stoma construction, hemihepatectomy, laparoscopic treatment of rectal cancer                             | PLA, ABS, photopolymer                                                                  | PC   | EG  | Manufacturing cost: 100 - 215                                                                           | Production time: 40 h                              | Colon cancer with liver metastasis, right colon cancer, rectal cancer, intractable constipation, anal fistula, patient education, preoperative planning, and evaluating the response of liver metastasis to chemotherapy, liver metastasis resection planning, lymphadenectomy, understanding pelvic anatomy in rectal cancer treatment, guiding electrode placement for constipation treatment and clarifying anal fistula anatomy. | no  | 9   | Image-guided surgery, Rectal cancer, Surgical education, Surgical navigation, Three-dimensional modeling, Three-dimensional printing | PRISMA, PROSPERO, NICE        |
| Jiang <i>et al.</i> [41]      | Oncology                       | Kidney                                                                          | Colon cancer, anal fistula, rectal cancer                                             | Laporoscopic nephrectomy                                                                                                     | N/A                                                                                     | P    | CN  | N/A                                                                                                     | Reduced operation time, reduced warm ischemia time | 3DP group advantages, shorter operation time, warm ischemic time, reduced intraoperative blood loss and fewer complications, 3DP approach appears preferable for complex renal tumor cases, further RCTs needed.                                                                                                                                                                                                                     | yes | 10  | 3D Printing, colorectal surgery, patient education, preoperative planning, systematic review, three-dimensional                      | PRISMA, NOS                   |
| Germandt <i>et al.</i> [47]   | Oral and Maxillofacial Surgery | Jaw                                                                             | Renal tumor                                                                           | Osteotomy                                                                                                                    | PA, photopolymer, silicone                                                              | P    | CH  | Manufacturing cost: 3 - 150                                                                             | Reduced operation time                             | Less invasive procedures are possible using 3DP to treat benign jaw lesions, reduce surgical time and avoid complications, further studies are needed.                                                                                                                                                                                                                                                                               | no  | 13  | Complex renal tumor, eGFR, laparoscopic partial nephrectomy, meta-analysis, three-dimensional printing                               | PRISMA, PROSPERO              |
| Jacobs <i>et al.</i> [48]     | Oral and Maxillofacial Surgery | Cranium, Mandible, Maxilla, Orbita                                              | Benign jaw lesions                                                                    | Craniofacial surgery, cranial defect repair, condylar head reconstruction, mandible fracture repair, orbital fracture repair | ABS                                                                                     | P    | US  | Model: 69.75 - 5500                                                                                     | Production time: 18.9 h                            | Costs range \$ 69.75 - \$ 5500, variable 3D - printing times and costs, four types in craniomaxillofacial surgery : contour models, guides splints, implants and potential for advancement in plastic surgery.                                                                                                                                                                                                                       | no  | 33  | Guided surgery, Virtual surgical planning, 3D printing, Benign jaw tumor, Jaw cyst                                                   | N/A                           |
| Ahmed <i>et al.</i> [49]      | Oral and Maxillofacial Surgery | Cranium, Jaw                                                                    | Craniofacial defect                                                                   | Cranioomaxillofacial surgery                                                                                                 | PDMS, ABS, Ti, PP, HA, PEEK, PCL, calcium phosphate, fibrinogen, gelatin, acrylic resin | P    | US  | Model: 1350                                                                                             | Reduced operation time                             | Medical interventions with 3DP implants compared to conventional approaches showed better outcomes and reductions in operative time, length of stay, and immediate complications.                                                                                                                                                                                                                                                    | no  | 49  | N/A                                                                                                                                  | PRISMA, ROBINS-1, RoB 2       |
| Alhabshi <i>et al.</i> [50]   | Oral and Maxillofacial Surgery | Cranium, Jaw                                                                    | Mandibular continuity defects                                                         | Cranioomaxillofacial surgery                                                                                                 | N/A                                                                                     | PC   | SA  | N/A                                                                                                     | Reduced operation time                             | 3DP used for models for pre-operative planning, orthognatic splints and guides in OMFS, shorter operation time and better patient communication.                                                                                                                                                                                                                                                                                     | no  | 71  | 3DP, Additive manufacturing, Electron beam melting, Laser sintered, Laser sintering, Selective laser melting                         | PRISMA                        |
| Wang <i>et al.</i> [51]       | Oral and Maxillofacial Surgery | Jaw, Face                                                                       | Maxillofacial defects                                                                 | Maxillofacial surgery                                                                                                        | N/A                                                                                     | PT   | BE  | Desktop printers: 1500 - 7000, professional printers: 20.000 - 200.000                                  | N/A                                                | Maxillofacial skeletal models have comparable accuracy to professional printers, material jetting and selective laser sintering offered the lowest error, highest difference was observed with fused deposition modeling.                                                                                                                                                                                                            | yes | 20  | Lefort i osteotomy, bilateral lefort ii osteotomy, orthodontic surgery, digital dentistry, oral and maxillofacial surgeon            | PRISMA, PROSPERO, PICO        |
| Oth <i>et al.</i> [52]        | Oral and Maxillofacial Surgery | Jaw                                                                             | Maxillofacial defects                                                                 | Genioplasty                                                                                                                  | PU, liquid silicone, photopolymer                                                       | P    | BE  | Manufacturing cost in house: 5, external services: 400 -1000                                            | Reduced operation time                             | 3DP surgical guides for genioplasties enhance precision, protect anatomy and reduce morbidity, further development in printer types, materials, sterilization, and open-access software can benefit more surgeons.                                                                                                                                                                                                                   | no  | 16  | Computer-aided design, Dimensional measurement accuracy, Printing, three-dimensional, Tomography                                     | PRISMA                        |

continued

| Author                             | Medical Field                  | Organ                                        | Path.  | Procedure                                                                                                                                                                                                          | Material                                                                    | APPL                                                                                                                 | RGN | Costs \$ | Time                                                                                                                  | Conclusion                                                                    | MA                                                                                                                                                                                                                                                                                                                   | IP  | KW | Study Quality                                                                                                                           |                              |
|------------------------------------|--------------------------------|----------------------------------------------|--------|--------------------------------------------------------------------------------------------------------------------------------------------------------------------------------------------------------------------|-----------------------------------------------------------------------------|----------------------------------------------------------------------------------------------------------------------|-----|----------|-----------------------------------------------------------------------------------------------------------------------|-------------------------------------------------------------------------------|----------------------------------------------------------------------------------------------------------------------------------------------------------------------------------------------------------------------------------------------------------------------------------------------------------------------|-----|----|-----------------------------------------------------------------------------------------------------------------------------------------|------------------------------|
| Murray-Douglass <i>et al.</i> [53] | Oral and Maxillofacial Surgery | Cranium, Orbita                              | Orbita | Maxillofacial defects                                                                                                                                                                                              | Orbital reconstruction                                                      | N/A                                                                                                                  | P   | AU       | N/A                                                                                                                   | Operation time: 48.3 - 117.5                                                  | 3DP models enhance orbital reconstruction, safe and effective and need for controlled studies. Mentioned implants, surgical guides and contour models.                                                                                                                                                               | yes | 58 | Genioplasty, three-dimensional, printing, surgery, computer-assisted                                                                    | PRISMA, PROSPERO, EQUATOR    |
| Singh <i>et al.</i> [54]           | Oral and Maxillofacial Surgery | Cranium, Orbita                              | Orbita | Orbital fracture                                                                                                                                                                                                   | Restoration of orbital defect and volume, correction of orbital dystopia    | N/A                                                                                                                  | P   | NP       | N/A                                                                                                                   | Reduced operation time                                                        | 3DP used to produce models to pre-shape orbital implants, leads to better implant fit, fewer complications and better surgical outcomes.                                                                                                                                                                             | yes | 10 | 3DP, Maxillofacial surgery, Orbital fracture, Orbital reconstruction, Trauma                                                            | PRISMA, PROSPERO, NOS        |
| Meglioli <i>et al.</i> [55]        | Oral and Maxillofacial Surgery | Cranium                                      |        | Orbital fracture                                                                                                                                                                                                   | Tumor removal, bone reconstruction                                          | PLA, ABS, PETG, PC, PEI, PA, calcium sulfate hemihydrate, opaque, photopolymer, cast powder and bonding agent, nylon | PT  | IT       | Printer: 2500 - 3000, model of temporal bone: 400, material jetting model: 270 - 1000, model of skull base: 250 - 280 | Print time for mandible: 4.5 h, maxilla: 6 h, operation time: reduced by 20 % | 3DP bone models for training and simulation vary in performance and cost, FDM is cost-effective for training models, material jetting printers are better but come at a higher cost, SLA, laser sintering, and binder jetting printers produce accurate models with suitable haptic feedback.                        | no  | 69 | Orbital fracture, orbital wall reconstruction, three-dimensional printing, blowout fractures,                                           | PRISMA, PROSPERO, CASP, PICO |
| Cao <i>et al.</i> [57]             | Orthopedics                    | Acetabulum                                   |        | Unilateral, bilateral ear defect                                                                                                                                                                                   | Acetabular fracture surgery                                                 | N/A                                                                                                                  | P   | CN       | N/A                                                                                                                   | Operation time: reduced by 38.8 m                                             | 3DP models for pre-operative planning, decreased operation time by 38.8 minutes, intraoperative blood loss by 259.7 ml and instrumentation time by 34.1 minutes, traditional surgery was less likely to achieve good/excellent function of hip and more likely to have complications than 3DP-assisted surgery.      | yes | 13 | 3DP, Additive manufacturing, Bone model, Surgical training, Preoperative planning, Simulation                                           | PRISMA, RoB 2, NOS           |
| Aguado-Maestro <i>et al.</i> [58]  | Orthopedics                    | Hip, Femur                                   |        | Acetabular fractures                                                                                                                                                                                               | Triplanar Osteotomy, proximal femoral osteotomy, trephination of femur head | N/A                                                                                                                  | PT  | ES       | Reduced cost                                                                                                          | Reduced operation time                                                        | 3DP used in hip surgery, for models, cutting guides, surgical guides, PSI, planning and teaching, shorter operation time, decreased fluoroscopy time, could lead to less risk of infection, reduced bleeding and costs, hip arthroscopy simulator - improves surgeons skills.                                        | no  | 62 | CAD, Digital workflow, Facial defect, Maxillofacial prosthesis, Rapid prototyping                                                       | PRISMA                       |
| Lopez <i>et al.</i> [59]           | Orthopedics                    | Spine                                        |        | Acetabular fractures, developmental hip dysplasia, slipped capital femoral epiphysis, Legg-Calvé-Perthes disease, shepherd's crook deformity, complex deformities of proximal femur, fractures                     | Surgery                                                                     | ABS, PA, PS, PC, SiCaP, Ti, photopolymer, calcium sulfate hemihydrate, resin, acrylate, stainless steel              | PTC | US       | Manufacturing cost: 175 - 5400                                                                                        | Reduced operation time by: 272 - 258 m                                        | Higher screw placement accuracy, pre-surgical planning, better patient and trainee communication and education, pre- and intraoperative guides, and screw drill guides in the treatment of scoliosis and other adult spinal deformities, average costs and production lead time are highly variable between studies. | no  | 32 | N/A                                                                                                                                     | PRISMA                       |
| Yang <i>et al.</i> [60]            | Orthopedics                    | Calcaneus, Humerus, Femur, Elbow, Acetabulum |        | Adult spinal deformity                                                                                                                                                                                             | Trauma surgery                                                              | N/A                                                                                                                  | P   | CN       | N/A                                                                                                                   | Reduced operation time                                                        | Shorter operation duration, less intraoperative blood loss, shorter fracture union time and higher rate of excellent outcomes.                                                                                                                                                                                       | yes | 12 | 3D printing, hip surgery, PSI                                                                                                           | PRISMA, PROSPERO, RoB 2      |
| Shi <i>et al.</i> [61]             | Orthopedics                    | Calcaneus                                    |        | Die-punch fractures, a.o. type fractures, intercondylar humeral fractures, acetabulum fracture, trimalleolar fracture, intra-articular distal radius fractures, complex proximal humeral fractures, pilon fracture | Surgery with extended lateral approach                                      | N/A                                                                                                                  | P   | CN       | N/A                                                                                                                   | Operation time: reduced by 0.72 - 2.97 m                                      | 3DP-assisted ELA surgery showed a better rate of excellent and good outcomes, shorter operation time, less intraoperative blood loss, fewer intraoperative fluoroscopies, fewer complications.                                                                                                                       | yes | 12 | 3DP, additive manufacturing, adult spinal deformity, deformity correction, rapid prototyping, spine surgery, three-dimensional printing | PRISMA, RoB 2                |
| Papotto <i>et al.</i> [62]         | Orthopedics                    | Hip                                          |        | Foraminal stenosis, osteosarcoma, chordoma, papillary thyroid carcinoma, spondylotic myelopathy, pseudoarthrosis, infection                                                                                        | Fracture surgery                                                            | N/A                                                                                                                  | PT  | IT       | Laboratory cost: 150,000 per year                                                                                     | Reduced operation time                                                        | 3DP benefits in orthopedics: enhancing fracture understanding, pre-op planning, personalized plates, resident training, and surgical simulation. Positive impact on surgical time, blood loss, fracture reduction, fixation and clinical outcomes.                                                                   | no  | 6  | 3DP, AFO, Additive manufacturing, Ankle foot orthoses                                                                                   | PRISMA, ROBINS-1             |
| Hecker <i>et al.</i> [63]          | Orthopedics                    | Tibial Plateau                               |        | Fracture                                                                                                                                                                                                           | Upper extremity surgery                                                     | N/A                                                                                                                  | P   | AT       | Wrist orthosis: 70, patient-specific guide: 2.415                                                                     | Operation time: reduced by 48.3 - 118 m                                       | 3DP in upper extremity surgery used for intraoperative templates, body implants, preoperative planning, prostheses, orthoses, benefits suggest positive effect on operation time, blood loss, further studies needed.                                                                                                | no  | 51 | Three-dimensional printing, additive manufacturing, patient-specific, implant, device, cage, spine                                      | PRISMA, PROSPERO             |
| González-Alonso <i>et al.</i> [64] | Orthopedics                    | Bone, Appendicular Skeleton                  |        | Fractures of elbow, intraarticular radius, intraarticular humerus, cubitus varus deformity, scaphoid nonunions, forearm malunions                                                                                  | Fracture surgery                                                            | ABS                                                                                                                  | P   | ES       | N/A                                                                                                                   | Operation time: reduced by 7.52 m - 27.00 m, production time: 5 h - 6 h       | Surgery with 3DP models leads to less surgical time, less fluoroscopy time, less intraoperative blood loss, no significant differences in fracture healing.                                                                                                                                                          | yes | 10 | 3DP, Acetabular fracture, Customised implant, Surgical planning                                                                         | PRISMA                       |

continued

| Author                        | Medical Field | Organ                      | Path.                                                                                                                                                                 | Procedure                                    | Material                                                     | APPL | RGN | Costs \$                                                       | Time                                                       | Conclusion                                                                                                                                                                                                                                                                                                 | MA  | IP | KW                                                                                                                                                                         | Study Quality            |
|-------------------------------|---------------|----------------------------|-----------------------------------------------------------------------------------------------------------------------------------------------------------------------|----------------------------------------------|--------------------------------------------------------------|------|-----|----------------------------------------------------------------|------------------------------------------------------------|------------------------------------------------------------------------------------------------------------------------------------------------------------------------------------------------------------------------------------------------------------------------------------------------------------|-----|----|----------------------------------------------------------------------------------------------------------------------------------------------------------------------------|--------------------------|
| Yammine <i>et al.</i> [97]    | Traumatology  | Humerus, Calcaneus, Radius | Fracture types: trimaleolar, proximal humeral, tibial plateau, tibial pilon, unstable pelvis, distal radius "die-punch", calcaneus, acetabular, intercondylar humeral | Open reduction and internal fixation surgery | N/A                                                          | P    | LB  | N/A                                                            | Reduced operation time                                     | Surgery pre-planned with 3DP models, yielded better perioperative results, less operation time, less intraoperative blood loss, less fluoroscopy dose and overall good results.                                                                                                                            | yes | 13 | 3D printing, upper extremity, rapid prototyping, patient-specific                                                                                                          | PRISMA, JBI              |
| Li <i>et al.</i> [65]         | Orthopedics   | Arm                        | High-energy fractures                                                                                                                                                 | Surgery                                      | N/A                                                          | PC   | CN  | N/A                                                            | Reduced operation time                                     | 3D physical models, 3DP-assisted surgery outperformed conventional procedures in operation time, blood loss volume, number of fluoroscopies, the reduction rate of anatomic proximal humeri, 3DP-assisted surgery improves operation time, anatomic healing, pain, and motion, with less harm to patients. | yes | 9  | Three dimensional printing, Fracture, Open reduction internal fixation, Surgical complications, Radiation exposure                                                         | PRISMA, RoB 2, MINORS    |
| Jiang <i>et al.</i> [66]      | Orthopedics   | Bone, Joint                | Limb loss                                                                                                                                                             | Osteotomy                                    | N/A                                                          | PC   | AU  | Model: 2 - 1500, printer: 500 - 500,000, material 20 - 1000/kg | Production time: 50 h                                      | 3DP custom guides and templates used for hip surgery, assessment of benefits was mostly subjective, and further data was needed to assess clinical benefit.                                                                                                                                                | no  | 55 | Trauma                                                                                                                                                                     | PRISMA                   |
| Anzellotti <i>et al.</i> [67] | Orthopedics   | Hip                        | Coronal plane malalignment                                                                                                                                            | Total hip arthroplasty                       | PLA, resin, plaster, nylon, fluid binding substances and ink | P    | IT  | Software: 15,000-30,000, printer: 120,000, material: 4 - 1500  | N/A                                                        | 3DP custom guides and templates used for hip surgery, no high-quality studies found, not clear if pre-operative planning saves time or cost, studies include, different materials and techniques, and diverse outcomes.                                                                                    | no  | 7  | Computer-aided design, orthopaedic procedures, orthopaedics, stereolithography, three-dimensional printing                                                                 | PRISMA, RoB 2            |
| Wilcox <i>et al.</i> [68]     | Orthopedics   | Spine                      | Osteoarthritis, developmental dysplasia of the hip, perthes disease, pelvic fractures                                                                                 | Spinal surgery                               | PU, PLA, Ti, PS, plaster, acrylate resin, photopolymer       | P    | AU  | Spinal surgical guide: 20 - 400                                | Production time: 5 h - 5 d                                 | Used for surgical planning, intra-operative surgical guides, customized prostheses, "Off-the-Shelf" implants, better properties of implants, less surgical time and improved patient outcomes, data from low-quality studies with biases.                                                                  | no  | 54 | Computer-aided design-computer-aided manufacturing, children's prosthetics, evaluation studies, prosthetic design, rapid prototyping, study design, upper-limb prosthetics | PRISMA                   |
| Wang <i>et al.</i> [69]       | Orthopedics   | Bone, Pelvis               | Osteogenesis imperfecta, neuromuscular disease, congenital malformations, cervicothoracic deformity, complex spinal disorders, tumor                                  | Fracture surgery                             | N/A                                                          | P    | CN  | Manufacturing cost: high                                       | N/A                                                        | 3DP group showed shorter operation time, less intraoperative blood loss, less complications, better quality of fracture reduction and fast function recovery.                                                                                                                                              | yes | 7  | N/A                                                                                                                                                                        | PRISMA, RoB 2, NOS       |
| Banierink <i>et al.</i> [70]  | Orthopedics   | Bone, Pelvis               | Pelvic fractures                                                                                                                                                      | Fracture surgery                             | N/A                                                          | P    | NL  | N/A                                                            | Operation time: reduced by 15 m, screw placement time: 9 m | Have a positive effect on operation time, blood loss, fluoroscopy dose, time and frequency as well as accuracy of screw placement, no improvement in clinical outcome in terms of fracture reduction and functional outcome.                                                                               | no  | 18 | 3D printing, hip, total hip arthroplasty, development dysplasia hip                                                                                                        | PRISMA, PROSPERO         |
| Lee <i>et al.</i> [71]        | Orthopedics   | Hip                        | Pelvic fractures                                                                                                                                                      | N/A                                          | N/A                                                          | P    | TW  | N/A                                                            | Operation time: reduced by 26 %                            | Technology is used for fracture mapping in acetabular and pelvic ring injuries, reduced surgical duration and reduced blood loss, lower postoperative complications and higher excellent/good reduction.                                                                                                   | yes | 17 | Three-dimensional printing, 3D, patient-specific implant, spinal surgery, spine, lumbar, off-the-shelf, additive manufacturing                                             | PRISMA, ROBINS-I         |
| Zhu <i>et al.</i> [72]        | Orthopedics   | Arm                        | Pelvic fractures, acetabular fractures                                                                                                                                | N/A                                          | N/A                                                          | P    | CN  | Manufacturing cost: high                                       | N/A                                                        | 3DP assisted surgery better than routine surgery in fields of operation time, frequency of intraoperative fluoroscopy and blood loss, in treatment of distal radius fractures, 3DP assisted surgery may be superior to routine surgery.                                                                    | yes | 6  | Meta-analysis, ORIF, Pelvic fractures, Three-dimensional printing                                                                                                          | PRISMA, PROSPERO, MINORS |
| Assink <i>et al.</i> [73]     | Orthopedics   | Tibia                      | Stroke, neuromuscular diseases, poststroke complications, neurodegenerative disorders, unilateral cerebral palsy, motor disabilities                                  | Tibial plateau fracture surgery              | N/A                                                          | P    | NL  | Model of proximal tibia : 50 - 100                             | Operation time: reduced by 21.7 m                          | Hand-held fracture models, pre-contouring of osteosynthesis plates, surgical guides, intra-operative 3D imaging, reduced operation time, less blood loss, decreased frequency of fluoroscopy, no differences in functional outcome.                                                                        | no  | 20 | 3DP, blood loss, distal radius fractures, intraoperative fluoroscopy, meta-analysis, operation time, surgery, systematic review                                            | PRISMA, PROSPERO         |
| He <i>et al.</i> [74]         | Orthopedics   | Tibia                      | Tibial plateau fractures                                                                                                                                              | N/A                                          | N/A                                                          | P    | CN  | N/A                                                            | Reduced operation time                                     | 3DP in tibia surgery reduces time, complications and enhances recovery.                                                                                                                                                                                                                                    | yes | 15 | Additive manufacturing, implant, follow-up results, pelvis reconstruction, acetabular implant                                                                              | PRISMA, PICOS            |
| Xie <i>et al.</i> [75]        | Orthopedics   | Tibia                      | Tibial plateau fractures                                                                                                                                              | Open reduction and internal fixation surgery | N/A                                                          | P    | CN  | N/A                                                            | Reduced operation time                                     | 3DP-assisted surgery for tibial plateau fractures showed advantages in shorter operation time, less blood loss, and faster union compared to conventional methods, complications and follow-up function recovery similar, further large-scale studies needed                                               | yes | 15 | shoulder and elbow exoskeletons, upper limb, additive manufacturing, 3D printing, orthotic devices                                                                         | PRISMA, NOS              |
| Wood <i>et al.</i> [76]       | Orthopedics   | Ankle, Foot                | N/A                                                                                                                                                                   | Foot and ankle fracture fixation             | N/A                                                          | P    | GB  | N/A                                                            | Reduced operation time                                     | 3DP assisted surgery improves operation duration, fluoroscopy dose, intraoperative blood loss and ankle health, further studies needed to assess costs and material.                                                                                                                                       | yes | 5  | 3DP, Surgical treatment, meta-analysis, tibial plateau fracture                                                                                                            | PRISMA, RoB 2            |

continued

| Author                       | Medical Field                   | Organ                                                                             | Path.                                                                                                    | Procedure                                                                                                                                                    | Material                                                                                   | APPL | RGN | Costs \$                                                                                                    | Time                                      | Conclusion                                                                                                                                                                                                                                                            | MA  | IP  | KW                                                                                                                            | Study Quality                  |
|------------------------------|---------------------------------|-----------------------------------------------------------------------------------|----------------------------------------------------------------------------------------------------------|--------------------------------------------------------------------------------------------------------------------------------------------------------------|--------------------------------------------------------------------------------------------|------|-----|-------------------------------------------------------------------------------------------------------------|-------------------------------------------|-----------------------------------------------------------------------------------------------------------------------------------------------------------------------------------------------------------------------------------------------------------------------|-----|-----|-------------------------------------------------------------------------------------------------------------------------------|--------------------------------|
| Quifones <i>et al.</i> [77]  | Orthopedics                     | Spine                                                                             | Trimalleolar fracture, calcaneal fracture, pilon AO/OTA                                                  | Spinal deformity correction surgeries, tumor removal, minimally invasive surgery, disc replacement surgery                                                   | ABS, PLA, Nylon, PETG, PP, bio-resorbable PU, HDPS, PEEK, Ti                               | PT   | ES  | Model of segment: 300                                                                                       | Reduced operation time                    | 3DP used for navigation templates and spinal implants and models, improves accuracy, precision, and safety in surgical procedures, paving the way for personalized treatments, particularly in tumor surgery.                                                         | no  | 38  | 3DP, Orthopedics, Three-dimensional printing, Tibial plateau fractures                                                        | PRISMA                         |
| Omari <i>et al.</i> [78]     | Otorhinolaryngology             | Head, Neck, Ear                                                                   | Scoliosis (children)                                                                                     | Otologic and auricular management                                                                                                                            | PLA, ABS, PEKK, TPU, PA and glass beads, resin and silicone, photopolymer PCL              | P    | DK  | Manufacturing cost: 0.73 -1.265                                                                             | Production time 0:20 h - 8h               | Guides, templates, implants and devices, faster manufacturing/operation time and reduced costs/complications, low-quality studies.                                                                                                                                    | yes | 63  | 3D printing, Spine surgery, Patient-centered medicine                                                                         | PRISMA, JBI tool               |
| Hong <i>et al.</i> [83]      | Otorhinolaryngology             | Head, Neck                                                                        | Absent auricle, deafness, kimura's disease, treacher-collins syndrome, tegment defect, chronic infection | Mandibular resection and reconstruction, auricular reconstruction, orbital reconstruction, maxillary resection and reconstruction, internal fixation surgery | N/A                                                                                        | PTC  | CA  | Manufacturing: cost - effective                                                                             | N/A                                       | 3DP is crucial in patient care, benefits for medical professionals, mentioned airway splints, 3DP models, 3DP models and prostheses.                                                                                                                                  | no  | 87  | 3DP in rehabilitation 3D printed orthoses and/or casts Musculoskeletal conditions Rehabilitation technology Upper extremity   | PRISMA, NOS                    |
| Frithioff <i>et al.</i> [82] | Otorhinolaryngology             | Cranium                                                                           | Microtia and squamous cell carcinoma, orbital wall/floor trauma, ameloblastoma, osteoradionecrosis       | Temporal bone surgery                                                                                                                                        | N/A                                                                                        | T    | DK  | Manufacturing cost: 0.9 - 400                                                                               | Production time: 3.5 h - 10 h             | 3DP models based on CT, processing is manual segmentation of key structures, postprocessing removal of print material inside the model, educational quality low.                                                                                                      | no  | 36  | 3D printing drill guide template , freehand technique , pedicle screw, scoliosis                                              | PRISMA, MERSQI                 |
| Leung <i>et al.</i> [84]     | Otorhinolaryngology             | Cranium, Nose, Sinus, Airway                                                      | Lateral skull base malangnics                                                                            | Ortical mastoidectomy, canaloplasty, labyrinthectomy, stapedotomy, cochlear implants, tympanostomy, myringotomy                                              | PLA, ABS, HIPS, PU, PCL, silicone, photopolymer                                            | PT   | CA  | Printer: 1000 - 200,000, model: 0.6 - 1200                                                                  | Production time: 5.5 h - 72 h             | High printer costs, affordable materials, positive medical student response, diverse temporal bone procedures studied, need for future research, 3DP in otolaryngology offers surgical skill utility, anatomical accuracy, and educational value.                     | yes | 39  | 3DP, Additive manufacturing, Ear surgery, Otology, Patient-specific                                                           | PRISMA, PROSPERO, NIH tool     |
| Chen <i>et al.</i> [80]      | Otorhinolaryngology             | Ear                                                                               | N/A                                                                                                      | Skull base surgery, temporal bone surgery, endoscopic endonasal surgery                                                                                      | ABS, PLA, calcium sulphate hemihydrate powder, silicone, photopolymers                     | T    | AU  | Model of temporal bone: 1.92 - 400, model of costal cartilage: 0.60, endoscopic nasal surgery simulator: 21 | N/A                                       | 3DP used for temporal bone dissection, airway procedures, functional endoscopic sinus surgery and endoscopic ear surgery, studies demonstrated positive feedback high accuracy.                                                                                       | no  | 22  | Three-dimensional printing, additive manufacturing, rapid prototyping, otolaryngology-head and neck                           | N/A                            |
| Canzi <i>et al.</i> [79]     | Otorhinolaryngology             | Head, Neck, Ear                                                                   | N/A                                                                                                      | Temporal bone dissection, ENT surgery                                                                                                                        | ABS, PLA, ABS, HIPS, PU, PCL, PEEK, photopolymer                                           | PT   | IT  | Manufacturing cost: 1 - 1000                                                                                | Operation time: reduced by 30 m-120 m N/A | 3DP in otolaryngology and head and neck surgery: multiple applications including education, surgical planning, tissue engineering, and prostheses. Shows industrial advancements in rapid prototyping. Limited patient data and insufficient comparative objectivity. | no  | 121 | 3DP, additive manufacturing, education, neurotology, otology, rapid prototyping, surgical simulation, temporal bone, training | PRISMA                         |
| Souza <i>et al.</i> [81]     | Otorhinolaryngology             | Head, Ear, Nose, Neck                                                             | Chronic rhinosinusitis                                                                                   | Airway surgery, laryngoplasty, temporal bone surgery, ENT surgery, labial cleft surgery                                                                      | PA, ABS, PLA, silicone, plaster, photopolymer, gypsum powder, calcium sulphate hemihydrate | T    | BR  | Material: 1.50 - 4000                                                                                       | N/A                                       | Surgical, anatomical and educational value, more approval ratings over time, educational programs may consider implementing 3DP on larger scale.                                                                                                                      | no  | 39  | 3Dprinting, Otolaryngology, Surgical education, Anatomy, Costs, Education                                                     | PRISMA                         |
| Langdon <i>et al.</i> [86]   | Pediatrics, Otorhinolaryngology | Cranium, Nose, Ears                                                               | Salivary gland disease, subglottic stenosis                                                              | Pediatric endoscopic skull base surgery                                                                                                                      | Resins combining soft materials, rubber-like material, rigid materials                     | PT   | ES  | Manufacturing: cost - effective                                                                             | N/A                                       | 3DP model used to plan pediatric skull base surgeries and to choose optimal treatment.                                                                                                                                                                                | no  | 6   | 3-Dimensional Printing, Education, Otolaryngology, Simulation Training, Surgery                                               | PRISMA, JBI tool               |
| Yang <i>et al.</i> [87]      | Pediatrics                      | Heart, Liver, Head, Neck                                                          | Nasal hemorrhage, neuroectodermal tumor, intracranial aneurysm, traumatic temporal bone fracture         | Ventricular septal defect, hepatectomy                                                                                                                       | N/A                                                                                        | PC   | CA  | N/A                                                                                                         | N/A                                       | Pediatric patient counseling with 3DP models can be a useful tool but further research is needed.                                                                                                                                                                     | no  | 6   | 3DP, Additive manufacturing, ENT, Otorhinolaryngology, Rapid prototyping, Systematic review                                   | PRISMA                         |
| Raza <i>et al.</i> [90]      | Pediatrics                      | Bone, Femur, Pelvis, Humerus, Clavicle, Radius, Ulna, Talus, Calcaneus, Navicular | Head, neck, vascular malformations, liver disease                                                        | Pediatric osteotomies                                                                                                                                        | ABS, PLA, Ti, PMMA, Acrylic-PMMA, acrylate                                                 | P    | GB  | Reduced operation cost by 2700 per 45 minutes                                                               | Reduced operation time                    | Results show better operative time, fluoroscopic exposure, blood loss and angular correction, no significant difference was found in the 'pre-operative' category, further studies needed.                                                                            | no  | 22  | 3DP, Anatomy, Costs, Education, Otolaryngology, Surgical education                                                            | PRISMA, PROSPERO, ENTREQ, SwIM |

continued

| Author                          | Medical Field                   | Organ                                                                                                                         | Path.                                                                                                                            | Procedure                                                                                                                                                         | Material                                                               | APPL | RGN | Costs \$                                                                                         | Time                         | Conclusion                                                                                                                                                                                                                                                                            | MA  | IP  | KW                                                                                                                             | Study Quality    |
|---------------------------------|---------------------------------|-------------------------------------------------------------------------------------------------------------------------------|----------------------------------------------------------------------------------------------------------------------------------|-------------------------------------------------------------------------------------------------------------------------------------------------------------------|------------------------------------------------------------------------|------|-----|--------------------------------------------------------------------------------------------------|------------------------------|---------------------------------------------------------------------------------------------------------------------------------------------------------------------------------------------------------------------------------------------------------------------------------------|-----|-----|--------------------------------------------------------------------------------------------------------------------------------|------------------|
| Francoise <i>et al.</i> [89]    | Pediatrics                      | Craniofacial, Central Nervous System, Cardiothoracic, Upper Extremity, Lower Extremity, Gastrointestinal, Genitourinary Tract | N/A                                                                                                                              | Orthopedic surgery, cardiovascular surgery, neurosurgery, transplantation surgery, urological and gastrointestinal procedures, dental and craniofacial procedures | N/A                                                                    | PTC  | US  | Manufacturing cost: 20.75 - 4043                                                                 | Production time: 14.4 h      | 3DP devices equivalent/better, less operating time, fewer complications, improve procedural accuracy, safety, and efficiency, create rapid, cost-effective materials.                                                                                                                 | no  | 139 | 3D printing, endoscopic skull base surgery, Surgical planning and training                                                     | PRISMA           |
| Asif <i>et al.</i> [88]         | Pediatrics                      | Heart, Spine, Lung, Cranium                                                                                                   | N/A                                                                                                                              | Training procedures                                                                                                                                               | ABS                                                                    | PT   | GB  | Model: 15 - 2500                                                                                 | Production time: 5 - 18 h    | Teaching, cardiovascular conditions, participants improved test scores and faster times, user feedback was positive, greater user confidence, 3DP models cheaper than 'off-the-shelf' models available, benefit of using real-world pathologies.                                      | no  | 15  | Simulation                                                                                                                     | PRISMA, PROSPERO |
| Anand <i>et al.</i> [91]        | Pediatrics, Oncology            | Cranium                                                                                                                       | Pediatric congenital disorders, congenital heart disease, cloacal malformations, craniosynostosis, mullerian tract abnormalities | Preoperative assessment                                                                                                                                           | PLA, ABS, PV, photopolymer                                             | PTC  | IN  | Model: 450 - 500                                                                                 | Production time: 10 h - 5 d  | Diverse tumor applications, enhance surgical planning and anatomical understanding, improves parental understanding, complements radiological evaluation, variable costs and production time.                                                                                         | yes | 8   | Pediatric population                                                                                                           | PRISMA, PROSPERO |
| Katiyar <i>et al.</i> [92]      | Pediatrics, Orthopedics         | Spine                                                                                                                         | Extra cranial tumor                                                                                                              | Spinal surgery                                                                                                                                                    | PA, PLA, PU, Ti, ABS, PS, gypsum powder                                | P    | US  | Material: 11.77 - 3846.30                                                                        | Production time: 9 h - 168 h | 3DP models and screw drill guides for pedicle screw placement in pediatric spinal deformity surgery, improved accuracy without affecting operative time or blood loss, all studies using 3D spine models for preoperative planning found helpful increasing screw placement accuracy. | no  | 25  | N/A                                                                                                                            | PRISMA           |
| Stramiello <i>et al.</i> [85]   | Pediatrics, Otorhinolaryngology | Upper and lower respiratory tract                                                                                             | Pediatric spinal deformity                                                                                                       | Aortopexy, slide tracheoplasty, stents                                                                                                                            | PCL, HA, PEKK                                                          | PTC  | US  | Material: low cost                                                                               | N/A                          | Improves pre-operative assessment, helps facilitate patient/family education, case reports showing good results.                                                                                                                                                                      | no  | 37  | osteotomy, orthopedic, patient-specific instrumentation, surgery, three-dimensional printing (3D)                              | PRISMA           |
| Bauermeister <i>et al.</i> [93] | Plastic Surgery                 | Breast, Nose, Skin, Bone, Ears,                                                                                               | Tracheomalacia, tracheal stenosis, bronchomalacia, tracheo-bronchomalacia                                                        | Bone, breast nose, ear cartilage, skin reconstruction                                                                                                             | PCL                                                                    | PTC  | US  | Model of portal and hepatic venous anatomy: 100, model of arms: 100, model of ear prostheses: 30 | N/A                          | 3DP enables creation of personalized implants, revolutionizes the reconstruction of traumatic injuries, facial and limb prosthetics, implants.                                                                                                                                        | no  | 103 | N/A                                                                                                                            | N/A              |
| Virani <i>et al.</i> [94]       | Plastic Surgery                 | Lip                                                                                                                           | N/A                                                                                                                              | Cleft Care                                                                                                                                                        | MMA, PMMA, HA, PLA, TCP-PHB, biocompatible photopolymer, wax, silicone | PTC  | US  | Model: 11.43 - 250                                                                               | N/A                          | Nasolabial molding, implants, surgical planning, anatomic models/educational purposes, surgical simulation/training, bioprinting, shows potential advantages.                                                                                                                         | no  | 39  | Cardiology, data collection, information technology, neurosurgery, technology                                                  | PRISMA           |
| Rooney <i>et al.</i> [44]       | Radiation Oncology              | Skin, Cranium, Neck, Breast, Vagina, Liver                                                                                    | N/A                                                                                                                              | Brachytherapy, photon radiotherapy, electron radiotherapy, proton radiotherapy                                                                                    | N/A                                                                    | P    | US  | Manufacturing cost: low                                                                          | N/A                          | 3DP applications included quality assurance phantoms, brachytherapy applicators, bolus preclinical animal irradiation compensators and immobilization devices, most used brachytherapy applicators and bolus, small sample sizes, further studies needed.                             | no  | 103 | Children, extra-cranial, pediatric oncology, preoperative planning, solid tumors, three-dimensional printing                   | PRISMA           |
| Tino <i>et al.</i> [45]         | Radiation Oncology              | Thyroid Gland, Thorax, Head, Thoracic Ribs, Lung,                                                                             | Cancer                                                                                                                           | N/A                                                                                                                                                               | PLA, ABS, HIPS                                                         | N/A  | AU  | Model: low cost                                                                                  | N/A                          | AM in radiation medicine offers customization, density variation and cost-effective printing, materials like polylactic acid and acrylonitrile butadiene styrene are common. Polymer jetting allows for diverse phantoms in radiotherapy dosimetry.                                   | no  | 53  | Pediatric spinal deformity, three-dimensional printing, 3D printing, spine models, pedicle screw guides, preoperative planning | PRISMA           |
| Tack <i>et al.</i> [20]         | General Surgery                 | Knee, Hip, Shoulder, Hand                                                                                                     | Cancer                                                                                                                           | Maxillofacial surgery, cranial surgery, spinal surgery                                                                                                            | Ti, PEEK, HA, epoxy acrylic based resin, PMMA, PP, PES                 | PT   | BE  | Procedure cost: increased                                                                        | Reduced operation time       | 3DP aids various surgeries with reduced time and radiation, cost-effectiveness analysis needed.                                                                                                                                                                                       | no  | 227 | Pediatric, 3D printed, Airway, Obstruction, Stent, Trachea,                                                                    | N/A              |
| Diment <i>et al.</i> [21]       | General Surgery                 | Knee, Jaw, Teeth, Hip, Spine, Bone                                                                                            | Aneurysm, congenital heart disorders, musculoskeletal diseases                                                                   | N/A                                                                                                                                                               | N/A                                                                    | P    | GB  | Manufacturing cost: reduced                                                                      | Reduced operation time       | Majority oral and maxillofacial surgery and musculoskeletal system, RCTs involved 3DP anatomical models for preoperative planning and surgical guides, reduced surgical operation times and improved surgical accuracy shows clinical effectiveness.                                  | no  | 350 | 3D printing, 3D bioprinting, additive manufacturing, 3D printing, 3D bioprinting, additive manufacturing                       | N/A              |
| Soon <i>et al.</i> [22]         | General Surgery                 | Liver                                                                                                                         | Neoplasm, diseases of nervous system, circulatory system, respiratory system, digestive system, skin, musculoskeletal system     | Hepatic resection                                                                                                                                                 | PLA                                                                    | P    | AU  | Model: 30                                                                                        | Production time: 32 h        | STL standard technique in medical 3DP, FFF more affordable, liver 3D model accuracy 0.1 ± 0.06 mm, potential in general surgery, benefit for liver surgery is the 3D visualization of vascular relationships.                                                                         | no  | 6   | implant development, plastic and reconstructive surgery                                                                        | PRISMA           |

continued

| Author                          | Medical Field    | Organ                                                                     | Path.                                                                                                                                                                                                                           | Procedure                                                                             | Material                                                                                       | APPL                                                                       | RGN | Costs \$                                     | Time                                                            | Conclusion                                                                                                                                                                                                                                                                                  | MA  | IP  | KW                                                                                                                                                                                                                                                                                                                                                                | Study Quality                                                                                                                                 |                    |
|---------------------------------|------------------|---------------------------------------------------------------------------|---------------------------------------------------------------------------------------------------------------------------------------------------------------------------------------------------------------------------------|---------------------------------------------------------------------------------------|------------------------------------------------------------------------------------------------|----------------------------------------------------------------------------|-----|----------------------------------------------|-----------------------------------------------------------------|---------------------------------------------------------------------------------------------------------------------------------------------------------------------------------------------------------------------------------------------------------------------------------------------|-----|-----|-------------------------------------------------------------------------------------------------------------------------------------------------------------------------------------------------------------------------------------------------------------------------------------------------------------------------------------------------------------------|-----------------------------------------------------------------------------------------------------------------------------------------------|--------------------|
| Serrano <i>et al.</i> [23]      | General Surgery  | Jaw, Neck, Liver, Musculoskeletal System                                  | Head, Brain, Musculoskeletal System                                                                                                                                                                                             | Liver disease                                                                         | Maxillofacial surgery, neurosurgery, liver surgery, orthopedic surgery                         | N/A                                                                        | N/A | FR                                           | Material: 1 - 146, staff cost 2916 - 3114, printer: 2285 - 6706 | Reduced operation time                                                                                                                                                                                                                                                                      | no  | 9   | 3-dimensional printing, anatomic model, bioprinting, cleft lip, cleft palate, nasolabial molding, patient-specific implants, surgical simulation, surgical training                                                                                                                                                                                               | PRISMA, CHEERS checklist                                                                                                                      |                    |
| Martelli <i>et al.</i> [24]     | General Surgery  | Soft tissue, bony tissue                                                  | N/A                                                                                                                                                                                                                             | N/A                                                                                   | ABS, HA, Nylon, Plaster, PMMA, PA, PBS, resin, PCL, PC, PLA, PP, PS, silicone, starch, Ti, Wax | CoCrMo, CrCoMo                                                             | PT  | FR                                           | Model: 200 - 250                                                | Operation time: reduced by 5.7 m - 63 m                                                                                                                                                                                                                                                     | no  | 158 | Anatomic models, surgical guides, templates, implants, molds, primarily in maxillofacial, orthopedic operations, accuracy and time saved.                                                                                                                                                                                                                         | 3DP, additive manufacturing, clinical application, radiation oncology                                                                         | PRISMA             |
| Kermav-nar <i>et al.</i> [25]   | General Surgery  | Jaw, Liver, Breast, Musculoskeletal System, Spine, Knee, Pelvis, Rib Cage | Head, Brain, Musculoskeletal System, Knee, Rib                                                                                                                                                                                  | N/A                                                                                   | Spinal, knee, pelvic/hip surgery                                                               | PLA, PHA, PA, ABS, CrCoMo, HIPS, PCL, PEEK, PET-G, PMMA, TPU, photopolymer | PT  | IE                                           | Manufacturing cost: high                                        | Reduced operation time                                                                                                                                                                                                                                                                      | no  | 110 | 3DP is mostly used in surgical disciplines, devices produced include implantable devices, surgical guides, radiotherapy boluses, orthoses, surgical templates, surgical instruments, immobilization devices prostheses. 3DP medical devices include solving rare medical problems, enhanced procedure ease and accuracy, reduced duration, and improved outcomes. | Additive manufacturing, dosimetry, heterogeneity, imaging, radiation, radiopacity                                                             | PRISMA             |
| Tu <i>et al.</i> [96]           | Traumatology     | Hip                                                                       | Congenital or degenerative conditions, arthritis, cancer, hydrocephalus, spinal compression, heminasal deformities                                                                                                              | Open reduction and internal fixation surgery                                          | N/A                                                                                            | N/A                                                                        | P   | CN                                           | N/A                                                             | Reduced operation time                                                                                                                                                                                                                                                                      | yes | 9   | 3DP combined with ORIF helps surgeons to understand acetabular fractures better, and reduces operation time, intraoperative blood loss, intraoperative fluoroscopy times and postoperative complications, no significant differences in the excellent and good rate of Matta score.                                                                               | 3DP, Additive manufacturing, Anatomic model, Customized, Innovation, Patient-specific, Review, Surgery                                        | PRISMA, NOS, RoB 2 |
| Morgan <i>et al.</i> [95]       | Traumatology     | Musculoskeletal system                                                    | Acetabular fractures                                                                                                                                                                                                            | Orthopedic surgery                                                                    | trauma                                                                                         | N/A                                                                        | PTC | GB                                           | Model: 2 - 330, printer: 1000 - 2000                            | Operation time: reduced by 19.85 % production time: 5 h - 72 h                                                                                                                                                                                                                              | yes | 17  | Use of 3DP across all specialties in orthopedic trauma surgery demonstrated an overall reduction in operation time of intra-operative blood loss of, and number of times fluoroscopy.                                                                                                                                                                             | Additive manufacturing, fabrication, health care evaluation mechanisms, medical devices, personalised healthcare, printing, three-dimensional | PRISMA, PROSPERO   |
| Cacciamani <i>et al.</i> [98]   | Urology          | Kidney, Prostate, Adrenal Gland                                           | Fractures: trauma, acromial, die-punch, intertrochanteric, calcaneal, humeral intercondylar, elbow, lower limb, articular, trimalleolar, lateral tibial plateau, proximal humeral, acetabular, tile c pelvic, midshaft clavicle | Pelvic/lyceal system procedures, ureteral stents, kidney transplantation, nephrectomy | PCL, PLCL, silicone, photosensitive resin, ABS, PLA                                            | PTC                                                                        | US  | Manufacturing cost: 4 - 1000                 | N/A                                                             | Patient counseling, pre- and intraoperative surgical planning, and education in urology, help the surgeon visualize understand anatomy.                                                                                                                                                     | no  | 52  | 3D Haptic model, 3D Printing, 3D Printing liver, General surgery Figures                                                                                                                                                                                                                                                                                          | PRISMA, PROSPERO                                                                                                                              |                    |
| Coles-Black <i>et al.</i> [99]  | Urology          | Prostate                                                                  | Adrenal cancer, urethrovesical anastomosis, renal cancer, prostate cancer                                                                                                                                                       | Prostatectomy                                                                         | N/A                                                                                            | PTC                                                                        | AU  | Model: 23 - 500                              | Operation time: reduced by 23 m                                 | 23 min reduced time, 3DP models better than computer models in patient counseling and in visualizing complex anatomy and presurgical planning, aid patients to understand their disease better.                                                                                             | no  | 8   | Costs and cost analysis, Printing, Surgery, Systematic review, Three-dimensional                                                                                                                                                                                                                                                                                  | PRISMA, PROSPERO, ROBINS-1                                                                                                                    |                    |
| Checucci <i>et al.</i> [100]    | Urology          | Kidney                                                                    | Cancer                                                                                                                                                                                                                          | Nephron-sparing surgery                                                               | N/A                                                                                            | PC                                                                         | IT  | Model of prostate: 40, model of kidney: 1000 | N/A                                                             | Models enhance preoperative simulations and patient counseling, improve anatomical understanding, address material quality and cost limitations, overlap with augmented reality in surgery.                                                                                                 | no  | 10  | N/A                                                                                                                                                                                                                                                                                                                                                               | PRISMA, ROBINS-1, RoB 2                                                                                                                       |                    |
| Lupulescu <i>et al.</i> [101]   | Urology          | Kidney                                                                    | Kidney cancer                                                                                                                                                                                                                   | Renal Surgery                                                                         | Photopolymer, resin, thermoplastic polymer, PLA, silicone                                      | PTC                                                                        | AU  | Model: 1 - 1000                              | Production time: 15 m - 9 d                                     | Customized 3D-printed models, higher costs, provide superior anatomical visualization compared to traditional imaging, benefit surgical education and skills for junior and senior surgeons, can shorten the total manufacturing time, with applications ranging from 15 minutes to 9 days. | no  | 27  | 3D printing, medical device, medicine, patient, clinical, treatment                                                                                                                                                                                                                                                                                               | PRISMA                                                                                                                                        |                    |
| Sun <i>et al.</i> [102]         | Urology          | Kidney                                                                    | Renal disease                                                                                                                                                                                                                   | Laparoscopic procedures, laparoscopic partial nephrectomy                             | ABS, photopolymer, silicone                                                                    | PA                                                                         | P   | AU                                           | Model: 100 - 1000                                               | Production time: 3.5 h - 9 d                                                                                                                                                                                                                                                                | no  | 15  | Accurate 3D kidney models aid surgical planning, high accuracy tumor delineation, valuable preoperative tool, need for cost and time improvements, further research needed.                                                                                                                                                                                       | Acetabular fractures, Meta-analysis, Open reduction and internal fixation, Three-dimensional printing                                         | PRISMA             |
| Coles-Black <i>et al.</i> [106] | Vascular Surgery | Aorta                                                                     | Renal disease                                                                                                                                                                                                                   | Endovascular aneurysm repair                                                          | PLA, photopolymer, clear resin                                                                 | PET-G,                                                                     | PTC | AU                                           | Model: 20 - 563                                                 | Production time: 3 h - 7 d                                                                                                                                                                                                                                                                  | no  | 25  | 3DP patient-specific models, high accuracy, represent complex anatomy of the cardiovascular and cerebrovascular system and shows various abnormalities, especially congenital heart diseases and valvular pathologies, can serve as useful education tool for both parents and clinicians and pre-surgical planning and simulation.                               | Orthopaedic surgery, Trauma, Three-dimensional printing                                                                                       | PRISMA             |
| Coles-Black <i>et al.</i> [103] | Vascular Surgery | Aorta                                                                     | Abdominal aneurysm                                                                                                                                                                                                              | aortic Aneurysm repair                                                                | PLA, PET, biocompatible photopolymer, thermoplastic clear resin                                |                                                                            | P   | AU                                           | Model: 20 - 500                                                 | Production time: 3 h - 10 h                                                                                                                                                                                                                                                                 | no  | 9   | 3DP Education in urology, Patient counseling, Three-dimensional printing, Uro-technology                                                                                                                                                                                                                                                                          | PRISMA                                                                                                                                        |                    |

continued

| Author                  | Medical Field    | Organ                                                             | Path.                                          | Procedure                                 | Material                                   | APPL | RGN | Costs \$                                | Time | Conclusion                                                                                                                                                                                                                                                                                                                          | MA | IP | KW                                                                                                               | Study Quality |
|-------------------------|------------------|-------------------------------------------------------------------|------------------------------------------------|-------------------------------------------|--------------------------------------------|------|-----|-----------------------------------------|------|-------------------------------------------------------------------------------------------------------------------------------------------------------------------------------------------------------------------------------------------------------------------------------------------------------------------------------------|----|----|------------------------------------------------------------------------------------------------------------------|---------------|
| Sun <i>et al.</i> [104] | Vascular Surgery | Heart, Brain                                                      | Abdominal aneurysm, aortic juxtarenal aneurysm | Clipping surgery, mustard baffle revision | PLA, photopolymer, starch/cellulose powder | PT   | AU  | Material: 50.34 - 2000                  | N/A  | 3DP patient-specific models, high accuracy, represent complex anatomy of the cardiovascular and cerebrovascular system and shows various abnormalities, especially congenital heart diseases and valvular pathologies, can serve as useful education tool for both parents and clinicians and pre-surgical planning and simulation. | no | 48 | 3DP, NS-RARP, Prostate cancer, RARP, Robotic surgery                                                             | PRISMA        |
| Tam <i>et al.</i> [105] | Vascular Surgery | Celiac, Splenic, Carotid, Subclavian, Femoral Artery, Portal Vein | Cardio - and cerebrovascular diseases          | N/A                                       | ABS, PLA, PUR, nylon                       | PTC  | CN  | Model: 4 - 2360, printer: 2210 - 50.000 | N/A  | 3D printing in vascular medicine: varied applications, impact on patient management, pre-operative planning, intraoperative navigation, education, research, cost-effectiveness analysis needed for routine adoption.                                                                                                               | no | 42 | 3D-printed augmented reality, hyperaccurate 3D reconstructions, mixed reality, robotics, urological malignancies | PRISMA        |

**Abbreviations:** Path.: Pathology, APPL.: Application (P: Planning, T: Teaching, C: Counseling), RGN: Region, MA: Meta-Analysis, IP: Included Papers, KW: Keywords.

medRxiv preprint doi: <https://doi.org/10.1101/2024.04.11.23300674>; this version posted April 12, 2024. The copyright holder for this preprint (which was not certified by peer review) is the author/funder, who has granted medRxiv a license to display the preprint in perpetuity. It is made available under a [CC-BY 4.0 International license](https://creativecommons.org/licenses/by/4.0/).

Table 2: Systematic Reviews of On-Body Applications.

| Author                            | Medical Field                  | Organ                              | Path.                                                                                                                                                         | Procedure                                                                                                                    | Material                                                                  | APPL | RGN | Costs \$                                                     | Time                                                                                                                          | Conclusion                                                                                                                                                                                                                                                                                                                                                                             | MA  | IP | KW                                                                                                                                 | Study Quality                     |
|-----------------------------------|--------------------------------|------------------------------------|---------------------------------------------------------------------------------------------------------------------------------------------------------------|------------------------------------------------------------------------------------------------------------------------------|---------------------------------------------------------------------------|------|-----|--------------------------------------------------------------|-------------------------------------------------------------------------------------------------------------------------------|----------------------------------------------------------------------------------------------------------------------------------------------------------------------------------------------------------------------------------------------------------------------------------------------------------------------------------------------------------------------------------------|-----|----|------------------------------------------------------------------------------------------------------------------------------------|-----------------------------------|
| Tsoukala <i>et al.</i> [115]      | Dentistry                      | Teeth                              | Tooth loss                                                                                                                                                    | Circumferential supracrestal fiberotomy and interproximal reduction                                                          | PEEK, NiTi, photopolymer                                                  | N/A  | GR  | Manufacturing cost: lower                                    | Reduced production time                                                                                                       | 3DP fixed retainers and printed clear removable retainers seem to be cost and time-effective, further studies are needed to assess suitable material and technology.                                                                                                                                                                                                                   | no  | 5  | Additive manufacturing, 3D direct-printed retainers, 3D orthodontic retainers,                                                     | PRISMA, RoB 2, OSF                |
| Dewan [116]                       | Dentistry                      | Teeth                              | Tooth loss                                                                                                                                                    | Implantation of dental crowns and prostheses                                                                                 | Zirconia                                                                  | N/A  | SA  | N/A                                                          | N/A                                                                                                                           | Superior biological characteristics of both milled and 3D-printed zirconium crowns, suggesting viability as alternatives to traditional prosthetics, further studies needed to assess superiority.                                                                                                                                                                                     | yes | 9  | 3D-printed retainers                                                                                                               | PRISMA, PROSPERO                  |
| Mai <i>et al.</i> [117]           | Dentistry                      | Teeth                              | Tooth loss                                                                                                                                                    | Production of fixed dental networks                                                                                          | CoCr, resin                                                               | N/A  | KR  | N/A                                                          | N/A                                                                                                                           | RPD metal frameworks made through CAD/CAM showed slightly lower fit accuracy than those produced by traditional casting. CAD/CAM method still yielded clinically acceptable dimensional misfit.                                                                                                                                                                                        | yes | 7  | Monolithic zirconia crowns, 3D printing, milling, trueness, clinical precision                                                     | PRISMA, MINORS                    |
| Thakur <i>et al.</i> [18]         | Dentistry                      | Teeth                              | Tooth loss                                                                                                                                                    | Implantation of fixed partial dentures, single implant crowns                                                                | CoCr, PMMA, Ti, zirconia                                                  | P    | IN  | N/A                                                          | N/A                                                                                                                           | Implant-supported framework for dental implants produced by AM and SM, marginal fits are in an acceptable clinical range.                                                                                                                                                                                                                                                              | yes | 9  | Accuracy, Computer aided design/computer aided manufacturing, Metal framework, Removable partial denture, 3D printing              | PRISMA, MINORS                    |
| Rzeszuto <i>et al.</i> [27]       | Health Care Engineering        | N/A                                | Cancer                                                                                                                                                        | Production of PPE                                                                                                            | PLA, ABS, PETG, GreenTEC PRO based on lignin                              | N/A  | PL  | N/A                                                          | N/A                                                                                                                           | Technology used to produce PPE, has great potential to produce lacking equipment, AM not suitable for high-volume production.                                                                                                                                                                                                                                                          | no  | 34 | 3D printing, Additive manufacturing, Brachytherapy, Gynecological, Cervical, Endometrial, HDR, LDR                                 | N/A                               |
| Ibrahim <i>et al.</i> [26]        | Health Care Engineering        | N/A                                | COVID-19                                                                                                                                                      | Production of PPE and medical equipment                                                                                      | PA, ABS, PLA, Ti, CoCr, Liquid resin, nylon, photopolymer, plastic, metal | N/A  | GB  | N/A                                                          | N/A                                                                                                                           | Technology used to produce personal protective equipment, adjuncts for ventilation, ventilator equipment, and patient care such as nasal swabs in time of Covid-19 crisis.                                                                                                                                                                                                             | no  | 13 | COVID-19, personal protective equipment, three-dimensional printing                                                                | PRISMA                            |
| Przedlacka <i>et al.</i> [42]     | Oncology, Coloproctology       | Rectum                             | Cancer                                                                                                                                                        | Transanal total mesorectal excision, total mesorectal excision, laparoscopic resection                                       | PLA, PC-ABS, photopolymer                                                 | PTC  | GB  | N/A                                                          | Printing time: 22 - 40 h                                                                                                      | 3DP modelling in rectal cancer surgery, preoperative planning, intraoperative navigation, surgical education, device design, models of pelvic anatomy and rectal cancer, useful for vascular anomalies, lymph node dissection, and recurrent cases. Physical and virtual models valuable in education, limitations are segmentation challenges and lack of tissue-mimicking materials. | no  | 16 | Orthopedic oncology, prosthesis, surgical guide, limb salvage procedures, three-dimensional printing                               | PRISMA                            |
| Jacobs <i>et al.</i> [48]         | Oral and Maxillofacial Surgery | Cranium, Mandible, Maxilla, Orbita | Benign jaw lesions                                                                                                                                            | Craniofacial surgery, cranial defect repair, condylar head reconstruction, mandible fracture repair, orbital fracture repair | ABS                                                                       | P    | US  | Model: 69.75 - 5500                                          | Production time: 18.9 h                                                                                                       | Costs range \$ 69.75 - \$ 5500, variable 3D - printing times and costs, four types in craniomaxillofacial surgery : contour models, guides splints, implants and potential for advancement in plastic surgery.                                                                                                                                                                         | no  | 33 | Guided surgery, Virtual surgical planning, 3D printing, Benign jaw tumor, Jaw cyst                                                 | N/A                               |
| Alhabshi <i>et al.</i> [50]       | Oral and Maxillofacial Surgery | Cranium, Jaw                       | Mandibular continuity defects                                                                                                                                 | Cranioaxillofacial surgery                                                                                                   | N/A                                                                       | PC   | SA  | N/A                                                          | Reduced operation time                                                                                                        | 3DP used for models for pre-operative planning, orthognatic splints and guides in OMFs, shorter operation time and better patient communication.                                                                                                                                                                                                                                       | no  | 71 | 3DP, Additive manufacturing, Electron beam melting, Laser sintered, Laser sintering, Selective laser melting maxillofacial surgery | PRISMA                            |
| Farook <i>et al.</i> [118]        | Oral and Maxillofacial Surgery | Nose, Ear, Eye                     | Tumor                                                                                                                                                         | Production of nasal prostheses, auricular prostheses, orbital and ocular prostheses,                                         | ABS                                                                       | P    | MY  | Ear prostheses: 29.1 - 411.80, nasal prostheses: 37.43 - 413 | Production time of nasal prostheses: 19 h - 27 h, ear prostheses: 40 m - 10 h 42 m, orbital and ocular prostheses: 5 h - 13 h | CAD design quality depends on data acquisition and product type. Digital mould design is favoured for prostheses, offering patient comfort through customization. Mirroring in CAD is popular for auricular and orbital prostheses, but some fabrication steps still require manual intervention.                                                                                      | no  | 39 |                                                                                                                                    | PRISMA                            |
| Van Lieshout <i>et al.</i> [119]  | Orthopedics                    | Forearm                            | Displaced intra-articular calcaneal fractures                                                                                                                 | N/A                                                                                                                          | PLA                                                                       | N/A  | NL  | N/A                                                          | N/A                                                                                                                           | 3D-printed forearm braces as an alternative for a traditional plaster cast or splint fast to produce, light, durable, water-resistant materials, improve skin hygiene. Fused Deposition Modelling most commonly used technique, polylactic acid most commonly used material, patient satisfaction with printed brace good, more studies needed.                                        | no  | 12 | 3DP, effect, fracture, meta-analysis, safety, trauma                                                                               | N/A                               |
| Daryabor <i>et al.</i> [120]      | Orthopedics                    | Feet                               | Distal radius fracture, general forearm splint pediatric, drf forearm fractures, general wrist-hand orthosis, general wrist splint, pediatric wrist fractures | N/A                                                                                                                          | EVA, PLA, nylon, thermoplastic polyimide                                  | N/A  | IR  | Manufacturing cost: high                                     | N/A                                                                                                                           | 3DP insoles potential positive effect on comfort, evidence remains weak, variations in material flexibility, medial posting, and follow-up time influence impact, further research needed.                                                                                                                                                                                             | no  | 10 | 3DP, Calcaneal, Fracture, Meta-analysis                                                                                            | PRISMA, Downs and Black checklist |
| Wojciechowski <i>et al.</i> [121] | Orthopedics                    | Ankle, Foot                        | Flat feet                                                                                                                                                     | N/A                                                                                                                          | PA, ABS, PU, PLA, PC, resin, photopolymer                                 | N/A  | AU  | N/A                                                          | N/A                                                                                                                           | 3DP used to replicate traditional ankle foot orthoses, develop new designs, optimize the stiffness, and reduce the weight, 3DP custom AFOs are comparable to traditional custom AFOs.                                                                                                                                                                                                  | no  | 11 | 3DP, Cast, Fracture, Nonoperative, Orthosis, Patient-specific                                                                      | PRISMA, OCEBM, GRADE              |
| Hecker <i>et al.</i> [63]         | Orthopedics                    | Tibial Plateau                     | Fracture                                                                                                                                                      | Upper extremity surgery                                                                                                      | N/A                                                                       | P    | AT  | Wrist orthosis: 70, patient-specific guide: 2.415            | Operation time: reduced by 48.3 - 118 m                                                                                       | 3DP in upper extremity surgery used for intra-operative templates, body implants, preoperative planning , prostheses, orthoses, benefits suggest positive effect on operation time, blood loss, further studies needed.                                                                                                                                                                | no  | 51 | Three-dimensional printing, additive manufacturing, patient-specific, implant, device, cage, spine                                 | PRISMA, PROSPERO                  |

continued

medRxiv preprint doi: <https://doi.org/10.1101/2024.04.11.23300674>; this version posted April 12, 2024. The copyright holder for this preprint (which was not certified by peer review) is the author/funder, who has granted medRxiv a license to display the preprint in perpetuity. It is made available under a CC-BY 4.0 International license.



| Author                          | Medical Field       | Organ                                                                                                                          | Path.                                                                                                   | Procedure                                                                                                                                                         | Material                                                                                                   | APPL | RGN | Costs \$                                                                                           | Time                                    | Conclusion                                                                                                                                                                                                                                                | MA  | IP  | KW                                                                                                                                 | Study Quality            |
|---------------------------------|---------------------|--------------------------------------------------------------------------------------------------------------------------------|---------------------------------------------------------------------------------------------------------|-------------------------------------------------------------------------------------------------------------------------------------------------------------------|------------------------------------------------------------------------------------------------------------|------|-----|----------------------------------------------------------------------------------------------------|-----------------------------------------|-----------------------------------------------------------------------------------------------------------------------------------------------------------------------------------------------------------------------------------------------------------|-----|-----|------------------------------------------------------------------------------------------------------------------------------------|--------------------------|
| Abbadly <i>et al.</i> [122]     | Orthopedics         | Limbs                                                                                                                          | Humerus fracture                                                                                        | Amputation                                                                                                                                                        | PLA                                                                                                        | N/A  | NL  | Manufacturing cost: 35 - 1000, material: 10 - 980, PLA: 4.63 - 26.70                               | N/A                                     | Low material costs, good aesthetic appearance, personalized fitting, potential solution in lower-middle-income countries.                                                                                                                                 | no  | 18  | 3D printing, 3-dimensional printing, External fixation, Fracture, Stabilization, Orthopedics, Orthopaedics,                        | PRISMA                   |
| Diment <i>et al.</i> [123]      | Orthopedics         | Hand, Finger, Elbow, Arm                                                                                                       | N/A                                                                                                     | Amputation                                                                                                                                                        | N/A                                                                                                        | N/A  | GB  | Low manufacturing cost                                                                             | N/A                                     | 3DP used for children's prosthetics, efficacy and effectiveness lack substantial evidence, small sample sizes, lack of internal and external validity, and the absence of control groups, further research needed.                                        | no  | 8   | 3D, Meta-analysis, Proximal humeral fractures, Three-dimensional printing                                                          | PRISMA                   |
| Silva <i>et al.</i> [124]       | Orthopedics         | Trachea, Thoracic Spine Segment                                                                                                | Skeletal malignancy, hip arthritis, chondrosarcoma, skeletal tumor, ewings sarcoma                      | Production of exoskeletons, production orthoses                                                                                                                   | ABS, TPE, PLA, PEEK, PEKK, PEI, PETG, PA, aluminum with PLA, nylon, steel, carbon fiber reinforced polymer | N/A  | PT  | Low cost exoskeletons                                                                              | Reduced operation time                  | 3DP exoskeletons and orthotic solutions for upper limb, more research on elbow joint than on the shoulder joint, future of 3DP exoskeletons used with flexible and high-performance materials with devices.                                               | no  | 33  | three-dimensional printing, fracture mapping, meta-analysis                                                                        | PRISMA                   |
| He <i>et al.</i> [74]           | Orthopedics         | Tibia                                                                                                                          | Tibial plateau fractures                                                                                | N/A                                                                                                                                                               | N/A                                                                                                        | P    | CN  | N/A                                                                                                | Reduced operation time                  | 3DP in tibia surgery reduces time, complications and enhances recovery.                                                                                                                                                                                   | yes | 15  | Additive manufacturing, implant, follow-up results, pelvis reconstruction, acetabular implant                                      | PRISMA, PICOS            |
| Schwartz <i>et al.</i> [125]    | Orthopedics         | Upper extremities                                                                                                              | Tumor,spinal deformity                                                                                  | N/A                                                                                                                                                               | TPE, PA, ABS, PLA, biodegradable cornstarch-based material                                                 | N/A  | US  | Printer: 3 - 4000, material: 15 - 150, scanner: 500 - 5000                                         | Production time: 10 h - 5 d             | 3D printed orthoses effective, aesthetically pleasing, utilize lightweight and well-ventilated materials, expensive, lack of training of staff.                                                                                                           | no  | 10  | Three-dimensional printing, Revision surgery, Revision total hip arthroplasty, Revision total knee arthroplasty, Systematic review | PRISMA, PROSPERO, MINORS |
| Omari <i>et al.</i> [78]        | Otorhinolaryngology | Head, Neck, Ear                                                                                                                | Scoliosis (children)                                                                                    | Otologic and auricular management                                                                                                                                 | PLA, ABS, PEKK, TPU, PA and glass beads, resin and silicone, photopolymer                                  | P    | DK  | Manufacturing cost: 0.73 -1.265                                                                    | Production time 0:20 h - 8h             | Guides, templates, implants and devices, faster manufacturing/operation time and reduced costs/complications, low-quality studies.                                                                                                                        | yes | 63  | 3D printing, Spine surgery, Patient-centered medicine                                                                              | PRISMA, JBI tool         |
| Hong <i>et al.</i> [83]         | Otorhinolaryngology | Head, Neck                                                                                                                     | Absent auricle, deafness, kimura's disease, tracheo-collins syndrome, tegment defect, chronic infection | Mandibular resection and reconstruction, auricular reconstruction, orbital reconstruction, maxillary resection and reconstruction, internal fixation surgery      | PCL                                                                                                        | PTC  | CA  | Manufacturing cost - effective                                                                     | N/A                                     | 3DP is crucial in patient care, benefits for medical professionals, mentioned airway splints, 3DP models, 3DP models and prostheses.                                                                                                                      | no  | 87  | 3DP in rehabilitation 3D printed orthoses and/or casts Musculoskeletal conditions Rehabilitation technology Upper extremity        | PRISMA, NOS              |
| Francoise <i>et al.</i> [89]    | Pediatrics          | Craniofacial, Central Nervous System, Cardio-thoracic, Upper Extremity, Lower Extremity, Gastrointestinal, Genitourinary Tract | N/A                                                                                                     | Orthopedic surgery, cardiovascular surgery, neurosurgery, transplantation surgery, urological and gastrointestinal procedures, dental and craniofacial procedures | N/A                                                                                                        | PTC  | US  | Manufacturing cost: 20.75 - 4043                                                                   | Production time: 14.4 h                 | 3DP devices equivalent/better, less operating time, fewer complications, improve procedural accuracy, safety, and efficiency, create rapid, cost-effective materials.                                                                                     | no  | 139 | 3D printing, endoscopic skull base surgery, Surgical planning and training                                                         | PRISMA                   |
| Bauermeister <i>et al.</i> [93] | Plastic Surgery     | Breast, Bone, Nose, Ears, Skin                                                                                                 | Tracheomalacia, tracheal stenosis, bronchomalacia, tracheo-bronchomalacia                               | Bone, breast nose, ear cartilage, skin reconstruction                                                                                                             | PCL                                                                                                        | PTC  | US  | Model of portal and hepatic venous anatomy: j 100, model of arms: 100, model of ear prostheses: 30 | N/A                                     | 3DP enables creation of personalized implants, revolutionizes the reconstruction of traumatic injuries, facial and limb prosthetics, implants.                                                                                                            | no  | 103 | N/A                                                                                                                                | N/A                      |
| Rooney <i>et al.</i> [44]       | Radiation Oncology  | Skin, Cranium, Neck, Breast, Vagina, Liver                                                                                     | N/A                                                                                                     | Brachytherapy, photon radiotherapy, electron radiotherapy, proton radiotherapy                                                                                    | N/A                                                                                                        | P    | US  | Manufacturing cost: low                                                                            | N/A                                     | 3DP applications included quality assurance phantoms, brachytherapy applicators, bolus preclinical animal irradiation compensators and immobilization devices, most used brachytherapy applicators and bolus, small sample sizes, further studies needed. | no  | 103 | Children, extra-cranial, pediatric oncology, preoperative planning, solid tumors, three-dimensional printing                       | PRISMA                   |
| Martelli <i>et al.</i> [24]     | General Surgery     | Soft tissue, bony tissue                                                                                                       | N/A                                                                                                     | N/A                                                                                                                                                               | ABS, CoCrMo, HA, Nylon, Plaster, PMMA, PA, PBS, resin, PCL, PC, PLA, PP, PS, silicone, starch, Ti, Wax     | PT   | FR  | Model: 200 - 250                                                                                   | Operation time: reduced by 5.7 m - 63 m | Anatomic models, surgical guides, templates, implants, molds, primarily in maxillofacial, orthopedic operations, accuracy and time saved.                                                                                                                 | no  | 158 | 3DP, additive manufacturing, clinical application, radiation oncology                                                              | PRISMA                   |

continued

| Author                               | Medical Field      | Organ                                                                                                                   | Path. | Procedure                           | Material                                                                            | APPL | RGN | Costs \$                         | Time                        | Conclusion                                                                                                                                                                                                                                                                                                                                                                                       | MA | IP  | KW                                                                                        | Study Quality |
|--------------------------------------|--------------------|-------------------------------------------------------------------------------------------------------------------------|-------|-------------------------------------|-------------------------------------------------------------------------------------|------|-----|----------------------------------|-----------------------------|--------------------------------------------------------------------------------------------------------------------------------------------------------------------------------------------------------------------------------------------------------------------------------------------------------------------------------------------------------------------------------------------------|----|-----|-------------------------------------------------------------------------------------------|---------------|
| Kermav-<br>nar <i>et al.</i><br>[25] | General<br>Surgery | Jaw,<br>Head,<br>Liver,<br>Breast,<br>Muscu-<br>loskele-<br>tal<br>System,<br>Spine,<br>Knee,<br>Pelvis,<br>Rib<br>Cage | N/A   | Spinal, knee, pelvic/hip<br>surgery | PLA, PHA, PA, ABS,<br>CrCoMo, HIPS, PCL,<br>PEEK, PET-G, PMMA,<br>TPU, photopolymer | PT   | IE  | Manufac-<br>turing cost:<br>high | Reduced op-<br>eration time | 3DP is mostly used in surgical disciplines, de-<br>vices produced include implantable devices, surgi-<br>cal guides, radiotherapy boluses, orthoses, surgi-<br>cal templates, surgical instruments, immobilization de-<br>vices prostheses. 3DP medical devices include solv-<br>ing rare medical problems, enhanced procedure<br>ease and accuracy, reduced duration, and improved<br>outcomes. | no | 110 | Additive manufacturing, dosimetry,<br>heterogeneity, imaging, radiation, ra-<br>diopacity | PRISMA        |

**Abbreviations:** Path.: Pathology, APPL.: Application (P: Planning, T: Teaching, C: Counseling), RGN: Region, MA: Meta-Analysis, IP: Included Papers, KW: Keywords.

Table 3: Systematic Reviews of Invasive and Non-permanent Applications.

| Author                      | Medical Field           | Organ                    | Path.                                                                                                                                                                                | Procedure                                                                                            | Material                                                                  | APPL | RGN | Costs \$                  | Time                                                   | Conclusion                                                                                                                                                                                                                                         | MA  | IP | KW                                                                                                                                                                                                      | Study Quality                   |
|-----------------------------|-------------------------|--------------------------|--------------------------------------------------------------------------------------------------------------------------------------------------------------------------------------|------------------------------------------------------------------------------------------------------|---------------------------------------------------------------------------|------|-----|---------------------------|--------------------------------------------------------|----------------------------------------------------------------------------------------------------------------------------------------------------------------------------------------------------------------------------------------------------|-----|----|---------------------------------------------------------------------------------------------------------------------------------------------------------------------------------------------------------|---------------------------------|
| Shi <i>et al.</i> [126]     | Dentistry               | Jaw, Teeth               | Alveolar bone resorption                                                                                                                                                             | Guides for dental implants                                                                           | Metal                                                                     | P    | CN  | N/A                       | Reduced operation time                                 | Technology used for surgical guides to guide implant, milling more accurate than 3D printing for guides, importance of fixation screw and sleeve design, lack of universal standards for accuracy.                                                 | no  | 41 | Surgical guides, Guided implant surgery, Digital dentistry, Surgical accuracy, Deviation, Systematic review                                                                                             | PRISMA, PROSPERO, PICO          |
| Verweij <i>et al.</i> [127] | Dentistry               | Teeth                    | Tooth loss                                                                                                                                                                           | Tooth transplantation                                                                                | N/A                                                                       | P    | NL  | N/A                       | N/A                                                    | Transplantation enables accurate planning, surgery easier, and decreases extra-oral time, and the quality of evidence is low.                                                                                                                      | no  | 19 | 3DP, accuracy, dental casts, dental models, dentistry, orthodontics, systematic review, three-dimensional printing                                                                                      | PRISMA, CRIS, MINORS, CARE, RoB |
| Fahimian <i>et al.</i> [46] | Radiation Oncology      | Female Internal Genitals | Liver disease, hepatocellular carcinoma                                                                                                                                              | Brachytherapy                                                                                        | PLA, PC, PPSE, PEI, ABS,                                                  | P    | US  | Printer: low cost         | N/A                                                    | 3DP in gynecological Brachytherapy has witnessed rapid growth since 2014, this has as significantly improved the customization of applicator and template designs, marking progress in the precision and methodology of implantation and delivery. | no  | 29 | Hepatic tumor, Model, Simulation, Surgical planning, Three-dimensional printing                                                                                                                         | N/A                             |
| Ibrahim <i>et al.</i> [26]  | Health Care Engineering | N/A                      | COVID-19                                                                                                                                                                             | Production of PPE and medical equipment                                                              | PA, ABS, PLA, Ti, CoCr, Liquid resin, nylon, photopolymer, plastic, metal | N/A  | GB  | N/A                       | N/A                                                    | Technology used to produce personal protective equipment, adjuncts for ventilation, ventilator equipment, and patient care such as nasal swabs in time of Covid-19 crisis.                                                                         | no  | 13 | COVID-19, personal protective equipment, three-dimensional printing                                                                                                                                     | PRISMA                          |
| Randazzo <i>et al.</i> [38] | Neurosurgery            | Spine, Brain             | Arthrodesis, ewing sarcoma, primary bone tumor, sacral chordoma, spondylotic myelopathy, degenerative scoliosis, infectious spondylitis, chondrosarcoma, degenerative lumbar disease | Aneurysm clipping, transnasal sphenoid endoscopy, cerebrovascular surgery, spinal functional surgery | PLA, ABS, photopolymer, liquid silicone, urethane, high-acyl gellan gum   | PT   | US  | N/A                       | N/A                                                    | Anatomically accurate methods models, surgical planning, simulation and training, tissue-engineered implants, and secondary devices.                                                                                                               | no  | 36 | 3DP, Additive manufacturing, Custom made, Implant, Patient-specific, Spine surgery                                                                                                                      | N/A                             |
| Azimi <i>et al.</i> [128]   | Neurosurgery            | Spine                    | Cranial defect                                                                                                                                                                       | Cervical spine fusion                                                                                | N/A                                                                       | N/A  | IR  | Manufacturing cost: lower | Operation time: 144.7 m                                | 3DP group positive effects on accuracy rate of screw placement, operation time, intra-operative blood loss, fluoroscopic time, NOS bias assessment.                                                                                                | yes | 13 | 3D cranioplasty, ABS, PEEK, PET-G, PLA, PMMA, additive manufacturing, cranioplasty                                                                                                                      | PRISMA, NOS                     |
| Yu <i>et al.</i> [129]      | Neurosurgery            | Spine                    | Degenerative disc, fracture, stenosis, tumors, infection, facet disease                                                                                                              | Spinal surgery                                                                                       | N/A                                                                       | N/A  | CN  | N/A                       | N/A                                                    | Improve accuracy, rate of pedicle screw placement, shorten operative time and reduce intraoperative blood loss.                                                                                                                                    | yes | 13 | C1-C7, Cervical screw, 3DP, Drill guide template, Pedicle screw, Screw placement accuracy                                                                                                               | PRISMA, NOS                     |
| Wallace <i>et al.</i> [130] | Neurosurgery            | Spine, Vertebrae         | Spinal deformity, spinal cord injury, nerve root injury                                                                                                                              | Pedicle screw placement                                                                              | PA, ABS, acrylate resin                                                   | P    | US  | Drill guide: 20 - 500     | Operation time: 32.3 m less                            | Pedicle screws placed with 3DP drill guides, have shorter operative time, less blood loss, higher probability of good screw placement.                                                                                                             | yes | 6  | Drill guide template, Free-hand technique, Pedicle screw, Pedicle screw fixation, drill guide template, patient-specific drill template, pedicle screw, free-hand technique, and pedicle screw fixation | PRISMA                          |
| Liang <i>et al.</i> [131]   | Neurosurgery            | Spine                    | Cancer, spinal deformity                                                                                                                                                             | Spinal surgery                                                                                       | N/A                                                                       | N/A  | CN  | Reduced cost              | Production time: 1 - 2 d, reduced screw placement time | 3DP template technique is more accurate higher rate of excellently placed screws, a lower rate of poorly placed screws, mean placement time per screw, total screw placement time and blood loss significantly reduced.                            | yes | 8  | 3-dimensional print, additive manufacturing, patientspecific, stereolithography, selective laser sintering, drill guide, pedicle screw, posterior spinal instrumentation                                | PRISMA, NOS                     |

continued

medRxiv preprint doi: <https://doi.org/10.1101/2024.04.11.23300674>; this version posted April 12, 2024. The copyright holder for this preprint (which was not certified by peer review) is the author/funder, who has granted medRxiv a license to display the preprint in perpetuity. It is made available under a CC-BY 4.0 International license.

| Author                             | Medical Field                  | Organ                                                            | Path.                         | Procedure                                                                                                                    | Material                                                                                                             | APPL | RGN | Costs \$                                                                                                              | Time                                                                          | Conclusion                                                                                                                                                                                                                                                                                                                                                                             | MA  | IP | KW                                                                                                              | Study Quality                 |
|------------------------------------|--------------------------------|------------------------------------------------------------------|-------------------------------|------------------------------------------------------------------------------------------------------------------------------|----------------------------------------------------------------------------------------------------------------------|------|-----|-----------------------------------------------------------------------------------------------------------------------|-------------------------------------------------------------------------------|----------------------------------------------------------------------------------------------------------------------------------------------------------------------------------------------------------------------------------------------------------------------------------------------------------------------------------------------------------------------------------------|-----|----|-----------------------------------------------------------------------------------------------------------------|-------------------------------|
| Serrano <i>et al.</i> [56]         | Oral and Maxillofacial Surgery | Jaw, Cranium                                                     | Spinal Deformity              | Jaw reconstruction                                                                                                           | N/A                                                                                                                  | P    | FR  | N/A                                                                                                                   | N/A                                                                           | 3DP used for models, surgical guides and implants. Jaw reconstruction with 3DP reduces operating times and enhances aesthetics. However, more high-quality studies are required for confirmation.                                                                                                                                                                                      | yes | 14 | 3DP, Drill guide template, Freehand technique, Pedicle screw, Spinal deformity                                  | PRISMA, Cochrane Q and Z test |
| Yen <i>et al.</i> [43]             | Oncology                       | Muscles, Spine, Pelvis, Humerus, Calcaneus, Femur, Tibia, Radius | Maxillofacial Defects         | N/A                                                                                                                          | Acrylic bone cement                                                                                                  | P    | US  | N/A                                                                                                                   | Operation time: 240 m                                                         | Pre-operative planning, prosthesis customization, and bioprinting, mainly of challenging tumor locations and proximity to neighbouring neurovascular structures, operative time and follow-up averaged 240 minutes (4 hours) and 25.8 months, safe and efficient method.                                                                                                               | no  | 74 | Additive manufacturing, Clinical outcome, Meta-analysis, Surgery, Systematic review, Three-dimensional printing | PRISMA                        |
| Przedlacka <i>et al.</i> [42]      | Oncology, Coloproctology       | Rectum                                                           | Cancer                        | Transanal total mesorectal excision, total mesorectal excision, laparoscopic resection                                       | PLA, PC-ABS, photopolymer                                                                                            | PTC  | GB  | N/A                                                                                                                   | Printing time: 22 - 40 h                                                      | 3DP modelling in rectal cancer surgery, preoperative planning, intraoperative navigation, surgical education, device design, models of pelvic anatomy and rectal cancer, useful for vascular anomalies, lymph node dissection, and recurrent cases. Physical and virtual models valuable in education, limitations are segmentation challenges and lack of tissue-mimicking materials. | no  | 16 | Orthopedic oncology, prosthesis, surgical guide, limb salvage procedures, three-dimensional printing            | PRISMA                        |
| Germandt <i>et al.</i> [47]        | Oral and Maxillofacial Surgery | Jaw                                                              | Renal tumor                   | Osteotomy                                                                                                                    | PA, photopolymer, silicone                                                                                           | P    | CH  | Manufacturing cost: 3 - 150                                                                                           | Reduced operation time                                                        | Less invasive procedures are possible using 3DP to treat benign jaw lesions, reduce surgical time and avoid complications, further studies are needed.                                                                                                                                                                                                                                 | no  | 13 | Complex renal tumor, eGFR, laparoscopic partial nephrectomy, meta-analysis, three-dimensional printing          | PRISMA, PROSPERO              |
| Jacobs <i>et al.</i> [48]          | Oral and Maxillofacial Surgery | Cranium, Mandible, Maxilla, Orbita                               | Benign jaw lesions            | Craniofacial surgery, cranial defect repair, condylar head reconstruction, mandible fracture repair, orbital fracture repair | ABS                                                                                                                  | P    | US  | Model: 69.75 - 5500                                                                                                   | Production time: 18.9 h                                                       | Costs range \$ 69.75 - \$ 5500, variable 3D - printing times and costs, four types in craniomaxillofacial surgery : contour models, guides splints, implants and potential for advancement in plastic surgery.                                                                                                                                                                         | no  | 33 | Guided surgery, Virtual surgical planning, 3D printing, Benign jaw tumor, Jaw cyst                              | N/A                           |
| Ahmed <i>et al.</i> [49]           | Oral and Maxillofacial Surgery | Cranium, Jaw                                                     | Craniofacial defect           | Craniomaxillofacial surgery                                                                                                  | PDMS, ABS, Ti, PP, HA, PEEK, PCL, calcium phosphate, fibrinogen, gelatin, acrylic resin                              | P    | US  | Model: 1350                                                                                                           | Reduced operation time                                                        | Medical interventions with 3DP implants compared to conventional approaches showed better outcomes and reductions in operative time, length of stay, and immediate complications.                                                                                                                                                                                                      | no  | 49 | N/A                                                                                                             | PRISMA, ROBINS-1, RoB 2       |
| Alhabshi <i>et al.</i> [50]        | Oral and Maxillofacial Surgery | Cranium, Jaw                                                     | Mandibular continuity defects | Craniomaxillofacial surgery                                                                                                  | N/A                                                                                                                  | PC   | SA  | N/A                                                                                                                   | Reduced operation time                                                        | 3DP used for models for pre-operative planning, orthognatic splints and guides in OMFS, shorter operation time and better patient communication.                                                                                                                                                                                                                                       | no  | 71 | 3DP, Additive manufacturing, Electron beam melting, Laser sintering, Laser sintering, Selective laser melting   | PRISMA                        |
| Oth <i>et al.</i> [52]             | Oral and Maxillofacial Surgery | Jaw                                                              | Maxillofacial defects         | Genioplasty                                                                                                                  | PU, liquid silicone, photopolymer                                                                                    | P    | BE  | Manufacturing cost in house: 5, external services: 400 -1000                                                          | Reduced operation time                                                        | 3DP surgical guides for genioplasties enhance precision, protect anatomy and reduce morbidity, further development in printer types, materials, sterilization, and open-access software can benefit more surgeons.                                                                                                                                                                     | no  | 16 | Computer-aided design, Dimensional measurement accuracy, Printing, three-dimensional, Tomography                | PRISMA                        |
| Murray-Douglass <i>et al.</i> [53] | Oral and Maxillofacial Surgery | Cranium, Orbita                                                  | Maxillofacial defects         | Orbital reconstruction                                                                                                       | N/A                                                                                                                  | P    | AU  | N/A                                                                                                                   | Operation time: 48.3 - 117.5                                                  | 3DP models enhance orbital reconstruction, safe and effective and need for controlled studies. Mentioned implants, surgical guides and contour models.                                                                                                                                                                                                                                 | yes | 58 | Genioplasty, printing, three-dimensional, surgery, computer-assisted                                            | PRISMA, PROSPERO, EQUATOR     |
| Meglioli <i>et al.</i> [55]        | Oral and Maxillofacial Surgery | Cranium                                                          | Orbital fracture              | Tumor removal, bone reconstruction                                                                                           | PLA, ABS, PETG, PC, PEI, PA, calcium sulfate hemihydrate, opaque, photopolymer, cast powder and bonding agent, nylon | PT   | IT  | Printer: 2500 - 3000, model of temporal bone: 400, material jetting model: 270 - 1000, model of skull base: 250 - 280 | Print time for mandible: 4.5 h, maxilla: 6 h, operation time: reduced by 20 % | 3DP bone models for training and simulation vary in performance and cost, FDM is cost-effective for training models, material jetting printers are better but come at a higher cost, SLA, laser sintering, and binder jetting printers produce accurate models with suitable haptic feedback.                                                                                          | no  | 69 | Orbital fracture, orbital wall reconstruction, three-dimensional printing, blowout fractures,                   | PRISMA, PROSPERO, CASP, PICO  |

continued

| Author                            | Medical Field | Organ             | Path.                                                                                                                                                                           | Procedure                                     | Material                                                                                                                                                              | APPL                                                                                                     | RGN | Costs \$ | Time                                                           | Conclusion                                                                | MA                                                                                                                                                                                                                                                                                                                   | IP  | KW | Study Quality                                                                                                                                                                         |                    |
|-----------------------------------|---------------|-------------------|---------------------------------------------------------------------------------------------------------------------------------------------------------------------------------|-----------------------------------------------|-----------------------------------------------------------------------------------------------------------------------------------------------------------------------|----------------------------------------------------------------------------------------------------------|-----|----------|----------------------------------------------------------------|---------------------------------------------------------------------------|----------------------------------------------------------------------------------------------------------------------------------------------------------------------------------------------------------------------------------------------------------------------------------------------------------------------|-----|----|---------------------------------------------------------------------------------------------------------------------------------------------------------------------------------------|--------------------|
| Cao <i>et al.</i> [57]            | Orthopedics   | Acetabulum        | Unilateral, bilateral ear defect                                                                                                                                                | Acetabular surgery                            | fracture                                                                                                                                                              | N/A                                                                                                      | P   | CN       | N/A                                                            | Operation time: reduced by 38.8 m                                         | 3DP models for pre-operative planning, decreased operation time by 38.8 minutes, intraoperative blood loss by 259.7 ml and instrumentation time by 34.1 minutes, traditional surgery was less likely to achieve good/excellent function of hip and more likely to have complications than 3DP-assisted surgery.      | yes | 13 | 3DP, Additive manufacturing, Bone model, Surgical training, Preoperative planning, Simulation CAD, Digital defect, Maxillofacial prosthesis, Rapid prototyping N/A                    | PRISMA, RoB 2, NOS |
| Aguado-Maestro <i>et al.</i> [58] | Orthopedics   | Hip, Femur        | Acetabular fractures                                                                                                                                                            | Triplanar proximal osteotomy of femur head    | Osteotomy, femoral trephination                                                                                                                                       | N/A                                                                                                      | PT  | ES       | Reduced cost                                                   | Reduced operation time                                                    | 3DP used in hip surgery, for models, cutting guides, surgical guides, PSI, planning and teaching, shorter operation time, decreased fluoroscopy time, could lead to less risk of infection, reduced bleeding and costs, hip arthroscopy simulator - improves surgeons skills.                                        | no  | 62 | 3DP, Additive manufacturing, Bone model, Surgical training, Preoperative planning, Simulation CAD, Digital defect, Maxillofacial prosthesis, Rapid prototyping N/A                    | PRISMA             |
| Lopez <i>et al.</i> [59]          | Orthopedics   | Spine             | Acetabular developmental dysplasia, slipped capital femoral epiphysis, Legg-Calvé-Perthes disease, shepherd's crook deformity, complex deformities of proximal femur, fractures | Surgery                                       | fractures, hip dysplasia, slipped capital femoral epiphysis, Legg-Calvé-Perthes disease, shepherd's crook deformity, complex deformities of proximal femur, fractures | ABS, PA, PS, PC, SiCaP, Ti, photopolymer, calcium sulfate, hemihydrate, resin, acrylate, stainless steel | PTC | US       | Manufacturing cost: 175 - 5400                                 | Reduced operation time by: 272 - 258 m                                    | Higher screw placement accuracy, pre-surgical planning, better patient and trainee communication and education, pre- and intraoperative guides, and screw drill guides in the treatment of scoliosis and other adult spinal deformities, average costs and production lead time are highly variable between studies. | no  | 32 | 3DP, Additive manufacturing, Bone model, Surgical training, Preoperative planning, Simulation CAD, Digital defect, Maxillofacial prosthesis, Rapid prototyping N/A                    | PRISMA             |
| Hecker <i>et al.</i> [63]         | Orthopedics   | Tibial Plateau    | Fracture                                                                                                                                                                        | Upper extremity surgery                       | Fracture                                                                                                                                                              | N/A                                                                                                      | P   | AT       | Wrist orthosis: 70, patient-specific guide: 2.415              | Operation time: reduced by 48.3 - 118 m                                   | 3DP in upper extremity surgery used for intraoperative templates, body implants, preoperative planning, prostheses, orthoses, benefits suggest positive effect on operation time, blood loss, further studies needed.                                                                                                | no  | 51 | Three-dimensional printing, additive manufacturing, patient-specific, implant, device, cage, spine 3D-print, additive manufacturing, fracture, orthopedics, rapid prototyping, trauma | PRISMA, PROSPERO   |
| O'Connor <i>et al.</i> [132]      | Orthopedics   | Head, Spine, Eye, | Fractures: tibial plateau, intercondylar, humeral, trimalleolar, complex proximal humeral, elbow, lunate fossa, acetabular, pilon, intraarticular distal radial                 | Surgery                                       | Fractures: tibial plateau, intercondylar, humeral, trimalleolar, complex proximal humeral, elbow, lunate fossa, acetabular, pilon, intraarticular distal radial       | ABS, photopolymer, PLA, nylon with chopped carbon fiber                                                  | N/A | US       | Model of fixator: 150                                          | Operation time: reduced by 10 m                                           | 3DP fixators for high-impact trauma surgery seem to have similar mechanical properties than conventional ones, promising results in clinical environment.                                                                                                                                                            | no  | 9  | 3D-print, additive manufacturing, fracture, orthopedics, rapid prototyping, trauma                                                                                                    | PRISMA             |
| Aman <i>et al.</i> [133]          | Orthopedics   | Knee              | Limb loss                                                                                                                                                                       | Proximal tibial or distal femoral osteotomies | Limb loss                                                                                                                                                             | N/A                                                                                                      | P   | US       | N/A                                                            | Reduced operation time, using cutting guide 39.6 - 63 minutes for surgery | Osteotomies planned with 3DP cutting guides and PSI lead to shorter operation times, and decreased intraoperative fluoroscopy times compared to conventional techniques.                                                                                                                                             | no  | 14 | Artificial limb, amputation, prosthesis, prosthetic device, 3D-printing, three-dimensional printing, developing countries, lower-income countries                                     | PRISMA, MINORS     |
| Anzellotti <i>et al.</i> [67]     | Orthopedics   | Hip               | Coronal plane malalignment                                                                                                                                                      | Total hip arthroplasty                        | Coronal plane malalignment                                                                                                                                            | PLA, resin, plaster, nylon, fluid binding substances and ink                                             | P   | IT       | Software: 15,000- 30,000, printer: 120,000, material: 4 - 1500 | N/A                                                                       | 3DP custom guides and templates used for hip surgery, no high-quality studies found, not clear if pre-operative planning saves time or cost, studies include, different materials and techniques, and diverse outcomes.                                                                                              | no  | 7  | Computer-aided design, orthopaedic procedures, orthopaedics, stereolithography, three-dimensional printing                                                                            | PRISMA, RoB 2      |
| Wilcox <i>et al.</i> [68]         | Orthopedics   | Spine             | Osteoarthritis, developmental dysplasia of the hip, perthes disease, pelvic fractures                                                                                           | Spinal surgery                                | Osteoarthritis, developmental dysplasia of the hip, perthes disease, pelvic fractures                                                                                 | PU, PLA, Ti, PS, plaster, acrylate resin, photopolymer                                                   | P   | AU       | Spinal surgical guide: 20 - 400                                | Production time: 5 h - 5 d                                                | Used for surgical planning, intra-operative surgical guides, customized prostheses, "Off-the-Shelf" implants, better properties of implants, less surgical time and improved patient outcomes, data from low-quality studies with biases.                                                                            | no  | 54 | Computer-aided design-computer-aided manufacturing, children's prosthetics, evaluation studies, prosthetic design, rapid prototyping, study design, upper-limb prosthetics            | PRISMA             |

continued

| Author                        | Medical Field           | Organ                                                                                                                         | Path.                                                                                                                                | Procedure                                                                                                                                                         | Material                                                                      | APPL | RGN | Costs \$                                      | Time                                         | Conclusion                                                                                                                                                                                                                                                                            | MA  | IP  | KW                                                                                                                                                                                                                                                      | Study Quality                  |
|-------------------------------|-------------------------|-------------------------------------------------------------------------------------------------------------------------------|--------------------------------------------------------------------------------------------------------------------------------------|-------------------------------------------------------------------------------------------------------------------------------------------------------------------|-------------------------------------------------------------------------------|------|-----|-----------------------------------------------|----------------------------------------------|---------------------------------------------------------------------------------------------------------------------------------------------------------------------------------------------------------------------------------------------------------------------------------------|-----|-----|---------------------------------------------------------------------------------------------------------------------------------------------------------------------------------------------------------------------------------------------------------|--------------------------------|
| Assink <i>et al.</i> [73]     | Orthopedics             | Tibia                                                                                                                         | Stroke, neuromuscular diseases, poststroke complications, neurodegenerative disorders, unilateral cerebral palsy, motor disabilities | Tibial plateau fracture surgery                                                                                                                                   | N/A                                                                           | P    | NL  | Model of proximal tibia : 50 - 100            | Operation time: reduced by 21.7 m            | Hand-held fracture models, pre-contouring of osteosynthesis plates, surgical guides, intra-operative 3D imaging, reduced operation time, less blood loss, decreased frequency of fluoroscopy, no differences in functional outcome.                                                   | no  | 20  | 3DP, blood loss, distal radius fractures, intraoperative fluoroscopy, meta-analysis, operation time, surgery, systematic review                                                                                                                         | PRISMA, PROSPERO               |
| Quiñones <i>et al.</i> [77]   | Orthopedics             | Spine                                                                                                                         | Trimalleolar fracture, calcaneal fracture, pilon AO/OTA                                                                              | Spinal deformity correction surgeries, tumor removal, minimally invasive surgery, disc replacement surgery                                                        | ABS, PLA, Nylon, PETG, PP, bioresorbable PU, HDPS, PEEK, Ti                   | PT   | ES  | Model of segment: 300                         | Reduced operation time                       | 3DP used for navigation templates and spinal implants and models, improves accuracy, precision, and safety in surgical procedures, paving the way for personalized treatments, particularly in tumor surgery.                                                                         | no  | 38  | 3DP, Orthopedics, Three-dimensional printing, Tibial plateau fractures                                                                                                                                                                                  | PRISMA                         |
| Lu <i>et al.</i> [134]        | Orthopedics, Pediatrics | Spine                                                                                                                         | Upper extremity musculoskeletal disease                                                                                              | Corrective surgery for scoliosis                                                                                                                                  | N/A                                                                           | P    | CN  | N/A                                           | Operation time: reduced by 2.00 m - 125.40 m | Surgery with assisted pedicle screw placement, leads to less blood loss, shorter surgical time, more accurate screw placement, lower complication rate and lower fluoroscopy time.                                                                                                    | yes | 7   | 3D printing, 3D models, Foot, Ankle, Pre-operative planning, Fracture                                                                                                                                                                                   | PRISMA, NOS                    |
| Omari <i>et al.</i> [78]      | Otorhinolaryngology     | Head, Neck, Ear                                                                                                               | Scoliosis (children)                                                                                                                 | Otologic and auricular management                                                                                                                                 | PLA, ABS, PEKK, TPU, PA and glass beads, resin and silicone, photopolymer PCL | P    | DK  | Manufacturing cost: 0.73 -1.265               | Production time 0.20 h - 8h                  | Guides, templates, implants and devices, faster manufacturing/operation time and reduced costs/complications, low-quality studies.                                                                                                                                                    | yes | 63  | 3D printing, Spine surgery, Patient-centered medicine                                                                                                                                                                                                   | PRISMA, JBI tool               |
| Hong <i>et al.</i> [83]       | Otorhinolaryngology     | Head, Neck                                                                                                                    | Absent auricle, deafness, kimura's disease, treacher-collins syndrome, tegment defect, chronic infection                             | Mandibular resection and reconstruction, auricular reconstruction, orbital reconstruction, maxillary resection and reconstruction, internal fixation surgery      | ABS, PLA, ABS, HIPS, PU, PCL, PEEK, photopolymer                              | PTC  | CA  | Manufacturing: cost - effective               | N/A                                          | 3DP is crucial in patient care, benefits for medical professionals, mentioned airway splints, 3DP models, 3DP models and prostheses.                                                                                                                                                  | no  | 87  | 3DP in rehabilitation 3D printed orthoses and/or casts Musculoskeletal conditions Rehabilitation technology Upper extremity 3DP, additive manufacturing, education, neurology, otology, rapid prototyping, surgical simulation, temporal bone, training | PRISMA, NOS                    |
| Canzi <i>et al.</i> [79]      | Otorhinolaryngology     | Head, Neck, Ear                                                                                                               | N/A                                                                                                                                  | Temporal bone dissection, ENT surgery                                                                                                                             | ABS, PLA, ABS, HIPS, PU, PCL, PEEK, photopolymer                              | PT   | IT  | Manufacturing cost: 1 - 1000                  | Operation time: reduced by 30 m-120 m        | 3DP in otolaryngology and head and neck surgery: multiple applications including education, surgical planning, tissue engineering, and prostheses. Shows industrial advancements in rapid prototyping. Limited patient data and insufficient comparative objectivity.                 | no  | 121 | 3DP, Anatomy, Costs, Education, Otolaryngology, Surgical education                                                                                                                                                                                      | PRISMA                         |
| Raza <i>et al.</i> [90]       | Pediatrics              | Bone, Femur, Pelvis, Humerus, Clavicle, Radius, Ulna, Talus, Calcaneus, Navicular                                             | Head, neck, vascular malformations, liver disease                                                                                    | Pediatric osteotomies                                                                                                                                             | ABS, PLA, Ti, PMMA, Acrylic-PMMA, acrylate                                    | P    | GB  | Reduced operation cost by 2700 per 45 minutes | Reduced operation time                       | Results show better operative time, fluoroscopic exposure, blood loss and angular correction, no significant difference was found in the 'pre-operative' category, further studies needed.                                                                                            | no  | 22  | 3DP, Anatomy, Costs, Education, Otolaryngology, Surgical education                                                                                                                                                                                      | PRISMA, PROSPERO, ENTREQ, SwIM |
| Francoisse <i>et al.</i> [89] | Pediatrics              | Craniofacial, Central Nervous System, Cardiothoracic, Upper Extremity, Lower Extremity, Gastrointestinal, Genitourinary Tract | N/A                                                                                                                                  | Orthopedic surgery, cardiovascular surgery, neurosurgery, transplantation surgery, urological and gastrointestinal procedures, dental and craniofacial procedures | N/A                                                                           | PTC  | US  | Manufacturing cost: 20.75 - 4043              | Production time: 14.4 h                      | 3DP devices equivalent/better, less operating time, fewer complications, improve procedural accuracy, safety, and efficiency, create rapid, cost-effective materials.                                                                                                                 | no  | 139 | 3D printing, endoscopic skull base surgery, Surgical planning and training                                                                                                                                                                              | PRISMA                         |
| Katiyar <i>et al.</i> [92]    | Pediatrics, Orthopedics | Spine                                                                                                                         | Extra cranial tumor                                                                                                                  | Spinal surgery                                                                                                                                                    | PA, PLA, PU, Ti, ABS, PS, gypsum powder                                       | P    | US  | Material: 11.77 - 3846.30                     | Production time: 9 h - 168 h                 | 3DP models and screw drill guides for pedicle screw placement in pediatric spinal deformity surgery, improved accuracy without affecting operative time or blood loss, all studies using 3D spine models for preoperative planning found helpful increasing screw placement accuracy. | no  | 25  | N/A                                                                                                                                                                                                                                                     | PRISMA                         |

continued

| Author                        | Medical Field                   | Organ                                                                            | Path.                                                          | Procedure                                              | Material                                                                                       | APPL | RGN | Costs \$                    | Time                                    | Conclusion                                                                                                                                                                                                                                                                                                                                                        | MA | IP  | KW                                                                                                                                                                                                                                                                                   | Study Quality |
|-------------------------------|---------------------------------|----------------------------------------------------------------------------------|----------------------------------------------------------------|--------------------------------------------------------|------------------------------------------------------------------------------------------------|------|-----|-----------------------------|-----------------------------------------|-------------------------------------------------------------------------------------------------------------------------------------------------------------------------------------------------------------------------------------------------------------------------------------------------------------------------------------------------------------------|----|-----|--------------------------------------------------------------------------------------------------------------------------------------------------------------------------------------------------------------------------------------------------------------------------------------|---------------|
| Stramiello <i>et al.</i> [85] | Pediatrics, Otorhinolaryngology | Upper and lower respiratory tract                                                | Pediatric spinal deformity                                     | Aortopexy, slide tracheoplasty, stents                 | PCL, HA, PEKK                                                                                  | PTC  | US  | Material: low cost          | N/A                                     | Improves pre-operative assessment, helps facilitate patient/family education, case reports showing good results.                                                                                                                                                                                                                                                  | no | 37  | osteotomy, pediatric orthopedic, patient-specific instrumentation, surgery, three-dimensional (3D) printing Children, extra-cranial, pediatric oncology, preoperative planning, solid tumors, three-dimensional printing Pediatric, 3D printed, Airway, Obstruction, Stent, Trachea, | PRISMA        |
| Rooney <i>et al.</i> [44]     | Radiation Oncology              | Skin, Cranium, Neck, Breast, Vagina, Liver                                       | N/A                                                            | Brachytherapy, radiotherapy, radiotherapy              | photon electron proton                                                                         | N/A  | P   | US                          | Manufacturing cost: low                 | N/A                                                                                                                                                                                                                                                                                                                                                               | no | 103 | 3DP applications included quality assurance phantoms, brachytherapy applicators, bolus preclinical animal irradiation compensators and immobilization devices, most used brachytherapy applicators and bolus, small sample sizes, further studies needed.                            | PRISMA        |
| Tack <i>et al.</i> [20]       | General Surgery                 | Knee, Hip, Shoulder, Hand                                                        | Cancer                                                         | Maxillofacial surgery, cranial surgery, spinal surgery | Ti, PEEK, HA, epoxy based resin, PMMA, PP, PES                                                 | PT   | BE  | Procedure cost: increased   | Reduced operation time                  | 3DP aids various surgeries with reduced time and radiation, cost-effectiveness analysis needed.                                                                                                                                                                                                                                                                   | no | 227 | 3D printed, Airway, Obstruction, Stent, Trachea,                                                                                                                                                                                                                                     | N/A           |
| Diment <i>et al.</i> [21]     | General Surgery                 | Knee, Jaw, Teeth, Hip, Spine, Bone                                               | Aneurysm, congenital heart disorders, musculoskeletal diseases | N/A                                                    | N/A                                                                                            | P    | GB  | Manufacturing cost: reduced | Reduced operation time                  | Majority oral and maxillofacial surgery and musculoskeletal system, RCTs involved 3DP anatomical models for preoperative planning and surgical guides, reduced surgical operation times and improved surgical accuracy shows clinical effectiveness.                                                                                                              | no | 350 | 3D printing, 3D bioprinting, additive manufacturing, 3D printing, 3D bioprinting, additive manufacturing, 3DP, additive manufacturing, clinical application, radiation oncology                                                                                                      | N/A           |
| Martelli <i>et al.</i> [24]   | General Surgery                 | Soft tissue, bony tissue                                                         | N/A                                                            | N/A                                                    | ABS, HA, Nylon, Plaster, PMMA, PA, PBS, resin, PCL, PC, PLA, PP, PS, silicone, starch, Ti, Wax | PT   | FR  | Model: 200 - 250            | Operation time: reduced by 5.7 m - 63 m | Anatomic models, surgical guides, templates, implants, molds, primarily in maxillofacial, orthopedic operations, accuracy and time saved.                                                                                                                                                                                                                         | no | 158 | 3DP, additive manufacturing, clinical application, radiation oncology                                                                                                                                                                                                                | PRISMA        |
| Kermav-nar <i>et al.</i> [25] | General Surgery                 | Jaw, Head, Liver, Breast, Muscu-loskeletal System, Spine, Knee, Pelvis, Rib Cage | N/A                                                            | Spinal, knee, pelvic/hip surgery                       | PLA, PHA, PA, ABS, CrCoMo, HIPS, PCL, PEEK, PET-G, PMMA, TPU, photopolymer                     | PT   | IE  | Manufacturing cost: high    | Reduced operation time                  | 3DP is mostly used in surgical disciplines, devices produced include implantable devices, surgical guides, radiotherapy boluses, orthoses, surgical templates, surgical instruments, immobilization devices prostheses. 3DP medical devices include solving rare medical problems, enhanced procedure ease and accuracy, reduced duration, and improved outcomes. | no | 110 | Additive manufacturing, dosimetry, heterogeneity, imaging, radiation, radiopacity                                                                                                                                                                                                    | PRISMA        |

**Abbreviations:** Path.: Pathology, APPL.: Application (P: Planning, T: Teaching, C: Counseling), RGN: Region, MA: Meta-Analysis, IP: Included Papers, KW: Keywords.

Table 4: Systematic Reviews of Invasive and Permanent Applications.

| Author                       | Medical Field                  | Organ                                                            | Path.                                                                                                                                                                                | Procedure                                                                                                                    | Material                                                                | APPL | RGN | Costs \$                                                                                               | Time                    | Conclusion                                                                                                                                                                                                                                                               | MA  | IP  | KW                                                                                                                                       | Study Quality                 |
|------------------------------|--------------------------------|------------------------------------------------------------------|--------------------------------------------------------------------------------------------------------------------------------------------------------------------------------------|------------------------------------------------------------------------------------------------------------------------------|-------------------------------------------------------------------------|------|-----|--------------------------------------------------------------------------------------------------------|-------------------------|--------------------------------------------------------------------------------------------------------------------------------------------------------------------------------------------------------------------------------------------------------------------------|-----|-----|------------------------------------------------------------------------------------------------------------------------------------------|-------------------------------|
| Oliveira <i>et al.</i> [135] | Dentistry                      | Teeth                                                            | Artery fistula, aneurysm, hypertrophic obstructive cardiomyopathy, left atrial appendage, tumor                                                                                      | N/A                                                                                                                          | Ti, PEEK                                                                | N/A  | BR  | N/A                                                                                                    | N/A                     | Further studies needed, dental implants, no standard methodology is available, implants produced with AM seem to have good porosity and osseointegration.                                                                                                                | no  | 13  | N/A                                                                                                                                      | N/A                           |
| Rutkūnas <i>et al.</i> [136] | Dentistry                      | Jaw, Teeth                                                       | Tooth loss                                                                                                                                                                           | N/A                                                                                                                          | Metal, ceramic, polymer, CoCr, Ti, Zirconia                             | N/A  | LT  | N/A                                                                                                    | N/A                     | AM implant-supported prostheses have similar accuracy compared to conventional techniques, and clinical studies with longer follow-up periods are needed to show the reliability of AM prostheses.                                                                       | no  | 16  | Additive manufacturing, ceramic, implant-supported restorations, metal                                                                   | PICOS, QUADAS-2               |
| Tsoukala <i>et al.</i> [115] | Dentistry                      | Teeth                                                            | Tooth loss                                                                                                                                                                           | Circumferential supracrestal fibrotomy and interproximal reduction                                                           | PEEK, NiTi, photopolymer                                                | N/A  | GR  | Manufacturing cost: lower                                                                              | Reduced production time | 3DP fixed retainers and printed clear removable retainers seem to be cost and time-effective, further studies are needed to assess suitable material and technology.                                                                                                     | no  | 5   | Additive manufacturing, 3D direct-printed retainers, 3D orthodontic retainers,                                                           | PRISMA, RoB 2, OSF            |
| Dewan [116]                  | Dentistry                      | Teeth                                                            | Tooth loss                                                                                                                                                                           | Implantation of dental crowns and prostheses                                                                                 | Zirconia                                                                | N/A  | SA  | N/A                                                                                                    | N/A                     | Superior biological characteristics of both milled and 3D-printed zirconium crowns, suggesting viability as alternatives to traditional prosthetics, further studies needed to assess superiority.                                                                       | yes | 9   | 3D-printed retainers                                                                                                                     | PRISMA, PROSPERO              |
| Thakur <i>et al.</i> [18]    | Dentistry                      | Teeth                                                            | Tooth loss                                                                                                                                                                           | Implantation of fixed partial dentures, single implant crowns                                                                | CoCr, PMMA, Ti, zirconia                                                | P    | IN  | N/A                                                                                                    | N/A                     | Implant-supported framework for dental implants produced by AM and SM, marginal fits are in an acceptable clinical range.                                                                                                                                                | yes | 9   | Accuracy, Computer aided design/computer aided manufacturing, Metal framework, Removable partial denture, 3D printing                    | PRISMA, MINORS                |
| Bae <i>et al.</i> [137]      | Dentistry                      | Teeth                                                            | Tooth loss                                                                                                                                                                           | N/A                                                                                                                          | CoCr                                                                    | N/A  | KR  | N/A                                                                                                    | N/A                     | Metal 3DP technologies are reliable, further controlled laboratory and clinical studies are required.                                                                                                                                                                    | yes | 21  | N/A                                                                                                                                      | PRISMA, QUADAS, PRISMA        |
| Burnard <i>et al.</i> [138]  | Neurosurgery                   | Spine                                                            | Aneurysm, stroke                                                                                                                                                                     | Spinal spondylectomy                                                                                                         | Surgery, Ti6Al4V, PEEK                                                  | N/A  | AU  | N/A                                                                                                    | N/A                     | Spinal surgery with implants, considerable utility for surgical management, positive surgeon and patient outcomes.                                                                                                                                                       | no  | 22  | Aneurysm, Arteriovenous malformation, Compliance, Lubricity, Neurointervention, Stroke, Three-dimensional (3D) printed model, Tortuosity | PRISMA, QUADAS, PRISMA        |
| Randazzo <i>et al.</i> [38]  | Neurosurgery                   | Spine, Brain                                                     | Arthrodesis, ewing sarcoma, primary bone tumor, sacral chordoma, spondylotic myelopathy, degenerative scoliosis, infectious spondylitis, chondrosarcoma, degenerative lumbar disease | Aneurysm clipping, transnasal sphenoid endoscopy, cerebrovascular surgery, spinal functional surgery                         | PLA, ABS, photopolymer, liquid silicone, urethane, high-acyl gellan gum | PT   | US  | N/A                                                                                                    | N/A                     | Anatomically accurate methods models, surgical planning, simulation and training, tissue-engineered implants, and secondary devices.                                                                                                                                     | no  | 36  | 3DP, Additive manufacturing, Custom made, Implant, Patient-specific, Spine surgery                                                       | N/A                           |
| Czyżewski <i>et al.</i> [36] | Neurosurgery                   | Cranium                                                          | Cerebral aneurysm, tumor, spinal conditions, treatment-resistant neurologic disorders                                                                                                | Cranioplasty                                                                                                                 | PLA, ABS, PET-G, PEEK, PMMA                                             | P    | PL  | Implant with material: PMMA 80: (for intra-op. molded version), PMMA: 650 - 800,HA: 7900, Ti :25 - 100 | N/A                     | Technologies used: SLM, SLS, FFF, DLP, and SLA, materials in fabrication: PLA, ABS, PET-G, PEEK, and PMMA, endoprotheses are reliable, and cheaper than the popular counterparts manufactured from polypropylene polyester, PMMA too expensive, PLA price better.        | no  | 251 | Additive manufacturing, surgical planning, surgical simulation, three-dimensional printing                                               | PRISMA                        |
| Serrano <i>et al.</i> [56]   | Oral and Maxillofacial Surgery | Jaw, Cranium                                                     | Spinal Deformity                                                                                                                                                                     | Jaw reconstruction                                                                                                           | N/A                                                                     | P    | FR  | N/A                                                                                                    | N/A                     | 3DP used for models, surgical guides and implants. Jaw reconstruction with 3DP reduces operating times and enhances aesthetics. However, more high-quality studies are required for confirmation.                                                                        | yes | 14  | 3DP, Drill guide template, Freehand technique, Pedicle screw, Spinal deformity                                                           | PRISMA, Cochrane Q and Z test |
| Yen <i>et al.</i> [43]       | Oncology                       | Muscles, Spine, Pelvis, Humerus, Calcaneus, Femur, Tibia, Radius | Maxillofacial Defects                                                                                                                                                                | N/A                                                                                                                          | Acrylic bone cement                                                     | P    | US  | N/A                                                                                                    | Operation time: 240 m   | Pre-operative planning, prosthesis customization, and bioprinting, mainly of challenging tumor locations and proximity to neighbouring neurovascular structures, operative time and follow-up averaged 240 minutes (4 hours) and 25.8 months, safe and efficient method. | no  | 74  | Additive manufacturing, Clinical outcome, Meta-analysis, Surgery, Systematic review, Three-dimensional printing                          | PRISMA                        |
| Jacobs <i>et al.</i> [48]    | Oral and Maxillofacial Surgery | Cranium, Mandible, Maxilla, Orbita                               | Benign jaw lesions                                                                                                                                                                   | Craniofacial surgery, cranial defect repair, condylar head reconstruction, mandible fracture repair, orbital fracture repair | ABS                                                                     | P    | US  | Model: 69.75 - 5500                                                                                    | Production time: 18.9 h | Costs range,\$ 69.75 -\$ 5500, variable 3D - printing times and costs, four types in craniomaxillofacial surgery : contour models, guides splints, implants and potential for advancement in plastic surgery.                                                            | no  | 33  | Guided surgery, Virtual surgical planning, 3D printing, Benign jaw tumor, Jaw cyst                                                       | N/A                           |

continued



| Author                             | Medical Field                  | Organ                                     | Path.                                                                                                    | Procedure                                                                                                                                                    | Material                                                                                                             | APPL | RGN | Costs \$                                                                                                              | Time                                                                          | Conclusion                                                                                                                                                                                                                                                                                                      | MA  | IP | KW                                                                                                                                                                         | Study Quality                |
|------------------------------------|--------------------------------|-------------------------------------------|----------------------------------------------------------------------------------------------------------|--------------------------------------------------------------------------------------------------------------------------------------------------------------|----------------------------------------------------------------------------------------------------------------------|------|-----|-----------------------------------------------------------------------------------------------------------------------|-------------------------------------------------------------------------------|-----------------------------------------------------------------------------------------------------------------------------------------------------------------------------------------------------------------------------------------------------------------------------------------------------------------|-----|----|----------------------------------------------------------------------------------------------------------------------------------------------------------------------------|------------------------------|
| Ahmed <i>et al.</i> [49]           | Oral and Maxillofacial Surgery | Cranium, Jaw                              | Craniofacial defect                                                                                      | Craniomaxillofacial surgery                                                                                                                                  | PDMS, ABS, Ti, PP, HA, PEEK, PCL, calcium phosphate, fibrinogen, gelatin, acrylic resin Ti                           | P    | US  | Model: 1350                                                                                                           | Reduced operation time                                                        | Medical interventions with 3DP implants compared to conventional approaches showed better outcomes and reductions in operative time, length of stay, and immediate complications. 3D-printed titanium PSIs have an increasingly valuable role in mandibular reconstruction.                                     | no  | 49 | N/A                                                                                                                                                                        | PRISMA, ROBINS-1, RoB 2      |
| Goodson <i>et al.</i> [139]        | Oral and Maxillofacial Surgery | Jaw                                       | Craniofacial defects                                                                                     | Titanium implant placement                                                                                                                                   |                                                                                                                      | P    | GB  | N/A                                                                                                                   | Operation time: reduced by 33 m                                               |                                                                                                                                                                                                                                                                                                                 | no  | 52 | 3D printing, computer-assisted design, computer-assisted manufacturing, craniofacial, surgical planning                                                                    | PRISMA, CEBM                 |
| Alhabshi <i>et al.</i> [50]        | Oral and Maxillofacial Surgery | Cranium, Jaw                              | Mandibular continuity defects                                                                            | Craniomaxillofacial surgery                                                                                                                                  | N/A                                                                                                                  | PC   | SA  | N/A                                                                                                                   | Reduced operation time                                                        | 3DP used for models for pre-operative planning, orthognatic splints and guides in OMFs, shorter operation time and better patient communication.                                                                                                                                                                | no  | 71 | 3DP, Additive manufacturing, Electron beam melting, Laser sintered, Laser sintering, Selective laser melting                                                               | PRISMA                       |
| Murray-Douglass <i>et al.</i> [53] | Oral and Maxillofacial Surgery | Cranium, Orbita                           | Maxillofacial defects                                                                                    | Orbital reconstruction                                                                                                                                       | N/A                                                                                                                  | P    | AU  | N/A                                                                                                                   | Operation time: 48.3 - 117.5                                                  | 3DP models enhance orbital reconstruction, safe and effective and need for controlled studies. Mentioned implants, surgical guides and contour models.                                                                                                                                                          | yes | 58 | Genioplasty, printing, three-dimensional, surgery, computer-assisted                                                                                                       | PRISMA, PROSPERO, EQUATOR    |
| Miglioli <i>et al.</i> [55]        | Oral and Maxillofacial Surgery | Cranium                                   | Orbital fracture                                                                                         | Tumor removal, bone reconstruction                                                                                                                           | PLA, ABS, PETG, PC, PEI, PA, calcium sulfate hemihydrate, opaque, photopolymer, cast powder and bonding agent, nylon | PT   | IT  | Printer: 2500 - 3000, model of temporal bone: 400, material jetting model: 270 - 1000, model of skull base: 250 - 280 | Print time for mandible: 4.5 h, maxilla: 6 h, operation time: reduced by 20 % | 3DP bone models for training and simulation vary in performance and cost, FDM is cost-effective for training models, material jetting printers are better but come at a higher cost, SLA, laser sintering, and binder jetting printers produce accurate models with suitable haptic feedback.                   | no  | 69 | Orbital fracture, orbital wall reconstruction, three-dimensional printing, blowout fractures,                                                                              | PRISMA, PROSPERO, CASP, PICO |
| Cao <i>et al.</i> [57]             | Orthopedics                    | Acetabulum                                | Unilateral, bilateral ear defect                                                                         | Acetabular fracture surgery                                                                                                                                  | N/A                                                                                                                  | P    | CN  | N/A                                                                                                                   | Operation time: reduced by 38.8 m                                             | 3DP models for pre-operative planning, decreased operation time by 38.8 minutes, intraoperative blood loss by 259.7 ml and instrumentation time by 34.1 minutes, traditional surgery was less likely to achieve good/excellent function of hip and more likely to have complications than 3DP-assisted surgery. | yes | 13 | 3DP, Additive manufacturing, Bone model, Surgical training, Preoperative planning, Simulation                                                                              | PRISMA, RoB 2, NOS           |
| Wallace <i>et al.</i> [140]        | Orthopedics                    | Spine                                     | Foot drop, bony foot deformities, poor balance                                                           | N/A                                                                                                                                                          | Ti6Al4V, Ti, PEKK                                                                                                    | N/A  | US  | N/A                                                                                                                   | Reduced operation time                                                        | 3DP technology to produce implants could be viable tool for orthopedic spinal surgery but true clinical effects need to be assessed in further studies.                                                                                                                                                         | no  | 17 | 3D foot scanner, Custom-made 3D-printed insole, Customized 3D-printed insoles, Flatfeet, Foot orthoses, Gait, Pes planus                                                   | MINORS                       |
| Hecker <i>et al.</i> [63]          | Orthopedics                    | Tibial Plateau                            | Fracture                                                                                                 | Upper extremity surgery                                                                                                                                      | N/A                                                                                                                  | P    | AT  | Wrist orthosis: 70, patient-specific guide: 2.415                                                                     | Operation time: reduced by 48.3 - 118 m                                       | 3DP in upper extremity surgery used for intra-operative templates, body implants, preoperative planning, prostheses, orthoses, benefits suggest positive effect on operation time, blood loss, further studies needed.                                                                                          | no  | 51 | Three-dimensional printing, additive manufacturing, patient-specific, implant, device, cage, spine                                                                         | PRISMA, PROSPERO             |
| Wilcox <i>et al.</i> [68]          | Orthopedics                    | Spine                                     | Osteoarthritis, developmental dysplasia of the hip, perthes disease, pelvic fractures                    | Spinal surgery                                                                                                                                               | PU, PLA, Ti, PS, plaster, acrylate resin, photopolymer                                                               | P    | AU  | Spinal surgical guide: 20 - 400                                                                                       | Production time: 5 h - 5 d                                                    | Used for surgical planning, intra-operative surgical guides, customized prostheses, "Off-the-Shelf" implants, better properties of implants, less surgical time and improved patient outcomes, data from low-quality studies with biases.                                                                       | no  | 54 | Computer-aided design-computer-aided manufacturing, children's prosthetics, evaluation studies, prosthetic design, rapid prototyping, study design, upper-limb prosthetics | PRISMA                       |
| Zoltan <i>et al.</i> [141]         | Orthopedics                    | Pelvis, Ilium, Acetabulum, Pubis, Ischium | Radius fractures                                                                                         | N/A                                                                                                                                                          | Ti6Al4V                                                                                                              | N/A  | US  | Manufacturing cost: high                                                                                              | Production time: 7d                                                           | 3DP customized implants for orthopedic surgeries, could be beneficial for personalized treatment of fractures.                                                                                                                                                                                                  | no  | 26 | 3DP, 3D virtual surgical planning, navigation, pelvic ring injury, sacroiliac screw, three-dimensional                                                                     | PRISMA                       |
| Zhang <i>et al.</i> [114]          | Orthopedics                    | Hip, Knee                                 | Tibial plateau fractures                                                                                 | Total hip and knee arthroplasty                                                                                                                              | N/A                                                                                                                  | P    | CN  | N/A                                                                                                                   | N/A                                                                           | Clinical application customized personalized prostheses and articulating spacers, satisfactory clinical and radiological outcomes, follow-up studies required.                                                                                                                                                  | no  | 10 | 3D preoperative planning, 3DP, 3D virtual surgical planning, Guided surgery, Three dimensional, Tibial plateau fracture                                                    | PRISMA                       |
| Quiñones <i>et al.</i> [77]        | Orthopedics                    | Spine                                     | Trimalleolar fracture, calcaneal fracture, pilon AO/OTA                                                  | Spinal deformity correction surgeries, tumor removal, minimally invasive surgery, disc replacement surgery                                                   | ABS, PLA, Nylon, PETG, PP, bio-resorbable PU, HDPS, PEEK, Ti                                                         | PT   | ES  | Model of segment: 300                                                                                                 | Reduced operation time                                                        | 3DP used for navigation templates and spinal implants and models, improves accuracy, precision, and safety in surgical procedures, paving the way for personalized treatments, particularly in tumor surgery.                                                                                                   | no  | 38 | 3DP, Orthopedics, Three-dimensional printing, Tibial plateau fractures                                                                                                     | PRISMA                       |
| Omari <i>et al.</i> [78]           | Otorhinolaryngology            | Head, Neck, Ear                           | Scoliosis (children)                                                                                     | Otologic and auricular management                                                                                                                            | PLA, ABS, PEKK, TPU, PA and glass beads, resin and silicone, photopolymer                                            | P    | DK  | Manufacturing cost: 0.73 - 1.265                                                                                      | Production time: 0:20 h - 8h                                                  | Guides, templates, implants and devices, faster manufacturing/operation time and reduced costs/complications, low-quality studies.                                                                                                                                                                              | yes | 63 | 3D printing, Spine surgery, Patient-centered medicine                                                                                                                      | PRISMA, JBI tool             |
| Hong <i>et al.</i> [83]            | Otorhinolaryngology            | Head, Neck                                | Absent auricle, deafness, kimura's disease, treacher-collins syndrome, tegment defect, chronic infection | Mandibular resection and reconstruction, auricular reconstruction, orbital reconstruction, maxillary resection and reconstruction, internal fixation surgery | PCL                                                                                                                  | PTC  | CA  | Manufacturing cost - effective                                                                                        | N/A                                                                           | 3DP is crucial in patient care, benefits for medical professionals, mentioned airway splints, 3DP models, 3DP models and prostheses.                                                                                                                                                                            | no  | 87 | 3DP in rehabilitation 3D printed orthoses and/or casts Musculoskeletal conditions Rehabilitation technology Upper extremity                                                | PRISMA, NOS                  |

continued

| Author                          | Medical Field       | Organ                                                                                                                         | Path.                                                                     | Procedure                                                                                                                                                         | Material                                                                                               | APPL | RGN | Costs \$                                                                                         | Time                                    | Conclusion                                                                                                                                                                                                                                                                                                                                                        | MA | IP  | KW                                                                                                                            | Study Quality |
|---------------------------------|---------------------|-------------------------------------------------------------------------------------------------------------------------------|---------------------------------------------------------------------------|-------------------------------------------------------------------------------------------------------------------------------------------------------------------|--------------------------------------------------------------------------------------------------------|------|-----|--------------------------------------------------------------------------------------------------|-----------------------------------------|-------------------------------------------------------------------------------------------------------------------------------------------------------------------------------------------------------------------------------------------------------------------------------------------------------------------------------------------------------------------|----|-----|-------------------------------------------------------------------------------------------------------------------------------|---------------|
| Canzi <i>et al.</i> [79]        | Otorhinolaryngology | Head, Neck, Ear                                                                                                               | N/A                                                                       | Temporal bone dissection, ENT surgery                                                                                                                             | ABS, PLA, ABS, HIPS, PU, PCL, PEEK, photopolymer                                                       | PT   | IT  | Manufacturing cost: 1 - 1000                                                                     | Operation time: reduced by 30 m-120 m   | 3DP in otolaryngology and head and neck surgery: multiple applications including education, surgical planning, tissue engineering, and prostheses. Shows industrial advancements in rapid prototyping. Limited patient data and insufficient comparative objectivity.                                                                                             | no | 121 | 3DP, additive manufacturing, education, neurotology, otology, rapid prototyping, surgical simulation, temporal bone, training | PRISMA        |
| Francoise <i>et al.</i> [89]    | Pediatrics          | Craniofacial, Central Nervous System, Cardiothoracic, Upper Extremity, Lower Extremity, Gastrointestinal, Genitourinary Tract | N/A                                                                       | Orthopedic surgery, cardiovascular surgery, neurosurgery, transplantation surgery, urological and gastrointestinal procedures, dental and craniofacial procedures | N/A                                                                                                    | PTC  | US  | Manufacturing cost: 20.75 - 4043                                                                 | Production time: 14.4 h                 | 3DP devices equivalent/better, less operating time, fewer complications, improve procedural accuracy, safety, and efficiency, create rapid, cost-effective materials.                                                                                                                                                                                             | no | 139 | 3D printing, endoscopic skull base surgery, Surgical planning and training                                                    | PRISMA        |
| Bauermeister <i>et al.</i> [93] | Plastic Surgery     | Breast, Bone, Nose, Ears, Skin                                                                                                | Tracheomalacia, tracheal stenosis, bronchomalacia, tracheo-bronchomalacia | Bone, breast nose, ear cartilage, skin reconstruction                                                                                                             | PCL                                                                                                    | PTC  | US  | Model of portal and hepatic venous anatomy: 100, model of arms: 100, model of ear prostheses: 30 | N/A                                     | 3DP enables creation of personalized implants, revolutionizes the reconstruction of traumatic injuries, facial and limb prosthetics, implants.                                                                                                                                                                                                                    | no | 103 | N/A                                                                                                                           | N/A           |
| Virani <i>et al.</i> [94]       | Plastic Surgery     | Lip                                                                                                                           | N/A                                                                       | Cleft Care                                                                                                                                                        | MMA, PMMA, HA, PLA, TCP-PHB, biocompatible photopolymer, wax, silicone                                 | PTC  | US  | Model: 11.43 - 250                                                                               | N/A                                     | Nasoalveolar molding, implants, surgical planning, anatomic models/educational purposes, surgical simulation/training, bioprinting, shows potential advantages                                                                                                                                                                                                    | no | 39  | Cardiology, data collection, information technology, neurosurgery, technology                                                 | PRISMA        |
| Tack <i>et al.</i> [20]         | General Surgery     | Knee, Hip, Shoulder, Hand                                                                                                     | Cancer                                                                    | Maxillofacial surgery, cranial surgery, spinal surgery                                                                                                            | Ti, PEEK, HA, epoxy HA, acrylic based resin, PMMA, PP, PES                                             | PT   | BE  | Procedure cost: increased                                                                        | Reduced operation time                  | 3DP aids various surgeries with reduced time and radiation, cost-effectiveness analysis needed.                                                                                                                                                                                                                                                                   | no | 227 | Pediatric, 3D printed, Airway, Obstruction, Stent, Trachea,                                                                   | N/A           |
| Diment <i>et al.</i> [21]       | General Surgery     | Knee, Jaw, Teeth, Hip, Spine, Bone                                                                                            | Aneurysm, congenital heart disorders, musculoskeletal diseases            | N/A                                                                                                                                                               | N/A                                                                                                    | P    | GB  | Manufacturing cost: reduced                                                                      | Reduced operation time                  | Majority oral and maxillofacial surgery and musculoskeletal system, RCTs involved 3DP anatomical models for preoperative planning and surgical guides, reduced surgical operation times and improved surgical accuracy shows clinical effectiveness.                                                                                                              | no | 350 | 3D printing, 3D bioprinting, additive manufacturing, 3D printing, 3D bioprinting, additive manufacturing,                     | N/A           |
| Martelli <i>et al.</i> [24]     | General Surgery     | Soft tissue, bony tissue                                                                                                      | N/A                                                                       | N/A                                                                                                                                                               | ABS, CoCrMo, HA, Nylon, Plaster, PMMA, PA, PBS, resin, PCL, PC, PLA, PP, PS, silicone, starch, Ti, Wax | PT   | FR  | Model: 200 - 250                                                                                 | Operation time: reduced by 5.7 m - 63 m | Anatomic models, surgical guides, templates, implants, molds, primarily in maxillofacial, orthopedic operations, accuracy and time saved.                                                                                                                                                                                                                         | no | 158 | 3DP, additive manufacturing, clinical application, radiation oncology                                                         | PRISMA        |
| Kermavnar <i>et al.</i> [25]    | General Surgery     | Jaw, Head, Liver, Breast, Musculoskeletal System, Spine, Knee, Pelvis, Rib Cage Aorta                                         | N/A                                                                       | Spinal, knee, pelvic/hip surgery                                                                                                                                  | PLA, PHA, PA, ABS, CoCoMo, HIPS, PCL, PEEK, PET-G, PMMA, TPU, photopolymer                             | PT   | IE  | Manufacturing cost: high                                                                         | Reduced operation time                  | 3DP is mostly used in surgical disciplines, devices produced include implantable devices, surgical guides, radiotherapy boluses, orthoses, surgical templates, surgical instruments, immobilization devices prostheses. 3DP medical devices include solving rare medical problems, enhanced procedure ease and accuracy, reduced duration, and improved outcomes. | no | 110 | Additive manufacturing, dosimetry, heterogeneity, imaging, radiation, radiopacity                                             | PRISMA        |
| Coles-Black <i>et al.</i> [103] | Vascular Surgery    | Aorta                                                                                                                         | Abdominal aortic aneurysm                                                 | Aneurysm repair                                                                                                                                                   | PLA, PET, biocompatible photopolymer, thermoplastic clear resin                                        | P    | AU  | Model: 20 - 500                                                                                  | Production time: 3 h -10 h              | Templates assist with placement of fenestrations in PMSGs, particularly in urgent or emergent cases.                                                                                                                                                                                                                                                              | no | 9   | 3DP, Education in urology, Patient counseling, Three-dimensional printing, Uro-technology                                     | PRISMA        |

**Abbreviations:** Path.: Pathology, APPL.: Application (P: Planning, T: Teaching, C: Counseling), RGN: Region, MA: Meta-Analysis, IP: Included Papers, KW: Keywords.

### 3 RESULTS

#### 3.1 Medical fields and applications

3DP is used in a wide range of medical fields (Figure 3), procedures (Figure 6), pathologies (Figure 7), organs (Figure 4) and applications (Figure 5). The majority of these are disciplines surrounding surgical areas. This is the first medical discipline mentioned in our tables. These include anaesthesia (n = 1), cardiology (n = 12), coloproctology (n = 1), dentistry (n = 12), general surgery (n = 7), health care engineering (n = 2), hepatology (n = 1), interventional radiology (n = 1), medical education (n = 5), neurosurgery (n = 10), oncology (n = 4), oral and maxillofacial surgery (n = 12), orthopedics (n = 34), otorhinolaryngology (n = 7), pediatrics (n = 8), plastic surgery (n = 2), radiation oncology (n = 3), traumatology (n = 3), urology (n = 5) and vascular surgery (n = 4).

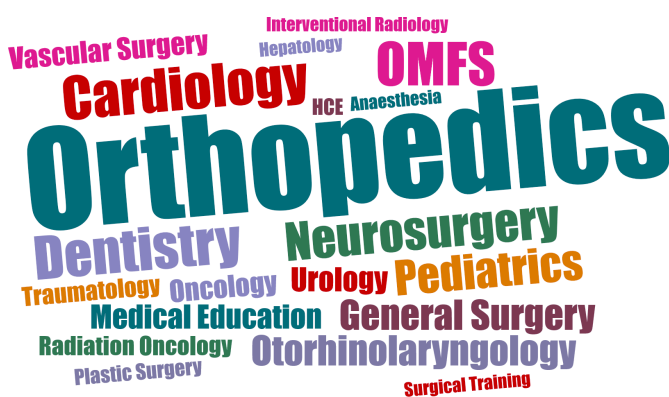

Figure 3: Medical fields breakdown.

##### 3.1.1 Orthopedics

The field with the most mentioned papers is the field of orthopedics (n = 34). 3DP can be used for models, pre-surgical planning, which can help the surgeon to prepare better for the surgery, because the 3D model makes it easier to understand the patient’s anatomy [68]. The 3DP technology is also used for prostheses. In this case, this field benefits from low material costs and better customization possibilities [114, 122]. Another application is individualized printed forearm braces used instead of traditional plaster casts, which might be more comfortable for the patient [119]. The last more invasive appliance for 3DP in this area are printed intra-operative guides such as screw drill guides or cutting guides as well as personalized implants [68, 141]. With the personalized guides, these surgeries can benefit from 3DP, in a way that for example the screws can be placed with more accuracy [59]. Other benefits in general are less blood loss during the surgery, less operation time and less fluoroscopy time [57, 76].

##### 3.1.2 Oral and Maxillofacial Surgery

Oral and maxillofacial surgery is the field with the second most amount of papers found in this meta-review. Main applications for 3D-printed models are intraoperative cutting/drilling guides and the use of patient specific implants (PSI) as part of the workflow in computer assisted surgery

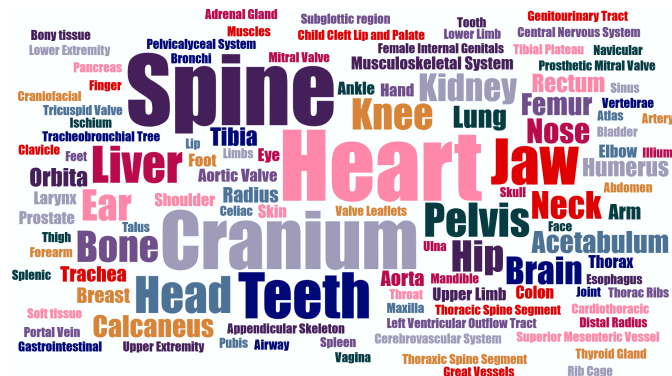

Figure 4: Organs breakdown.

(CAS) [142]. Preoperative 3D-printed models with included pathology can serve as a preoperative planning tool or as an intra-operative reference. The pre-operative planned surgery is less invasive and seems to have acceptable accuracy [51, 52]. Other applications include in this medical specialty include printed surgical guides and individualized implants [48]. Otorhinolaryngology applies treatment to a similar area as Oral and Maxillofacial Surgery. Here, 3DP is also used for surgical guides, models, implants and personalized devices [79]. This leads to faster operation time and reduced costs and complications [79], and an overall improved surgical outcome.

##### 3.1.3 Dentistry

In dentistry 3DP is used to produce models, implants, such as crowns or prostheses and occlusal splints [126, 136].

##### 3.1.4 Cardiology

In cardiology, 3DP technology was only found to be used for models to pre-operatively plan the surgery [4]. With congenital heart disease, these models seem to be a valuable tool to help the surgeon better visualize the patient’s anatomy [2, 3]. The models seem to accurately replicate the anatomy [6]. It is also a helpful tool for teaching and patient counselling. There is a lack of studies in this field and more trials are needed to confirm the accuracy of these findings [9].

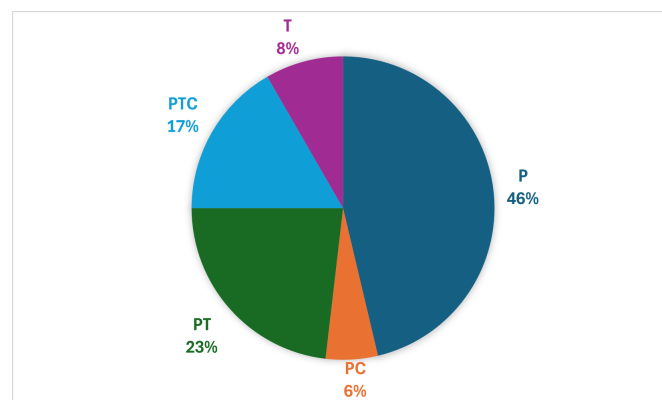

Figure 5: Distribution of applications including preoperative planning (P), teaching (T), or patient counseling (C).

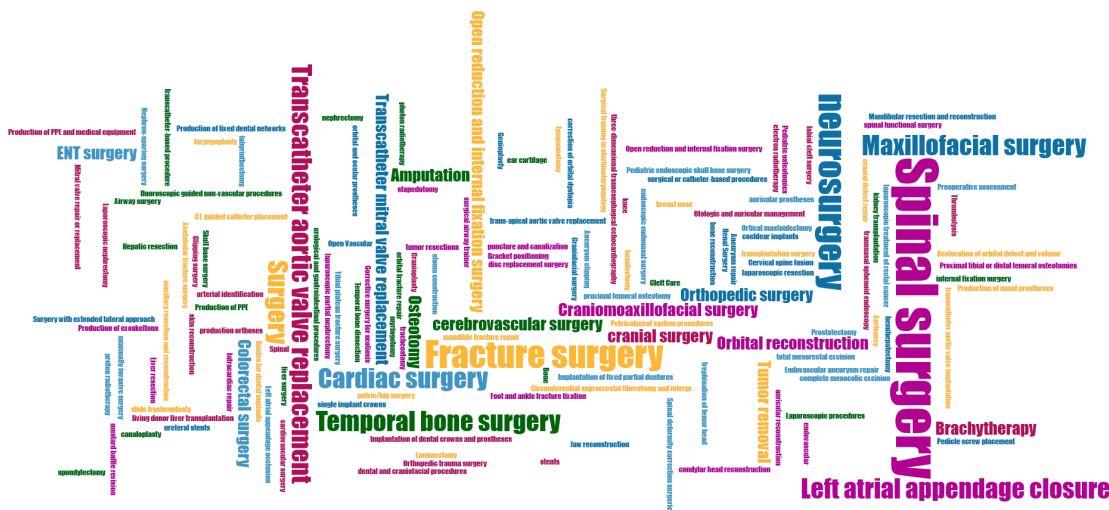

Figure 6: Procedures breakdown.

### 3.1.5 Neurosurgery

In neurosurgery, 3DP is primarily used to create patient-specific models for pre-surgical planning [38]. These models also serve as valuable tools for medical training, allowing for the education of residents [37]. Additionally, 3D-printed models are utilized to produce surgical guides that assist surgeons during procedures, as well as implants for the field [130].

The use of 3D-printed models for pre-surgical planning has been shown to improve surgical times and patient outcomes. [129, 138]. For instance, in spinal surgery, 3D-printed surgical guides and screw placement guides are employed to achieve high screw placement accuracy, leading to reduced operation times and less blood loss [129].

### 3.1.6 Pediatrics

Pediatrics is one of the areas where few reviews about 3DP were found. In this field, 3DP is used for pre-operative models, surgical guides and implants [89]. As children continue to grow, this has to be taken into account when planning operations involving implants. But also during surgery, 3DP can save time by pre-planning [89]. The accuracy of the models also seems to be good and inexpensive materials are used [89]. In the fields of anesthesia and interventional radiology and radiation oncology 3DP was used to produce models [29].

### 3.1.7 Oncology

In oncology, 3DP is mainly used to produce 3DP models, which helps the surgeon prepare for the surgery. This technology is mostly used for the treatment of challenging tumor locations such as kidney and liver tumors, as well as the treatment of gastrointestinal cancer [28, 40, 41]. In special cases such, as the reconstruction of hemipelvis structures due to oncological diseases, a custom-made or 3D-printed endoprosthesis is used [143]. 3D-printed models have a high degree of accuracy and can be a very valuable tool in patient education, as well as preoperative planning, which could shorten operating times [41].

### 3.1.8 Urology and Vascular Surgery

In the fields of urology and vascular surgery the technology is used to print 3D models, which are used for patient counseling, pre- and intra-operative surgical planning, as well as educational purposes [42, 43]. These fields are not very often mentioned and the use of implants or other 3D-printed devices is not reported yet.

### 3.1.9 Traumatology

Traumatology treats similar parts of the body as orthopedics, but the injuries are evoked with higher impact forces. 3DP is again a good tool to be used to print fracture models to help the surgeon understand the complex anatomy [96, 97]. When pre-planning a surgery with 3D models, it was reported that there was less fluoroscopy time, blood loss, and operation time [95, 97].

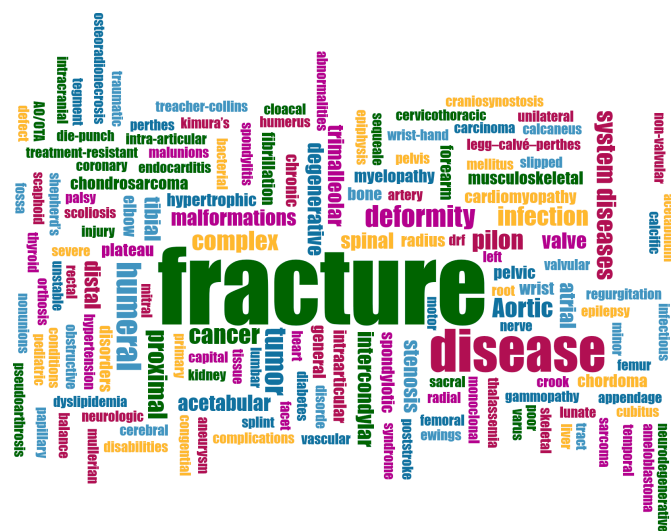

Figure 7: Pathologies breakdown.

## 3.2 Grade of Invasiveness

The reviews were classified by the grade of invasiveness. This turns out to be applicable for most of the reviews, but



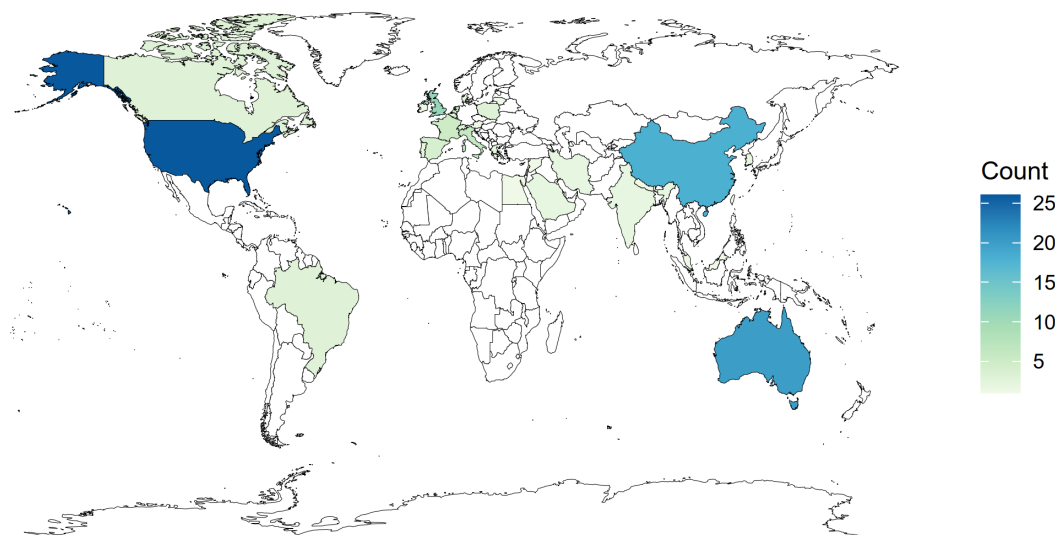

Figure 9: Origins of systematic reviews.

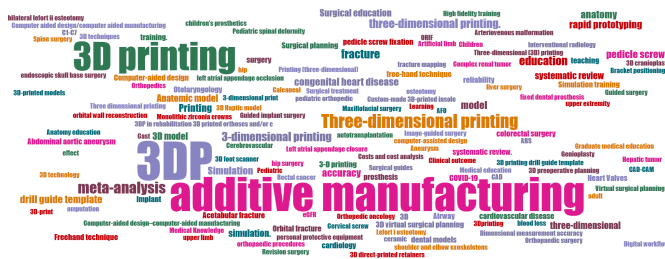

Figure 10: Keywords breakdown.

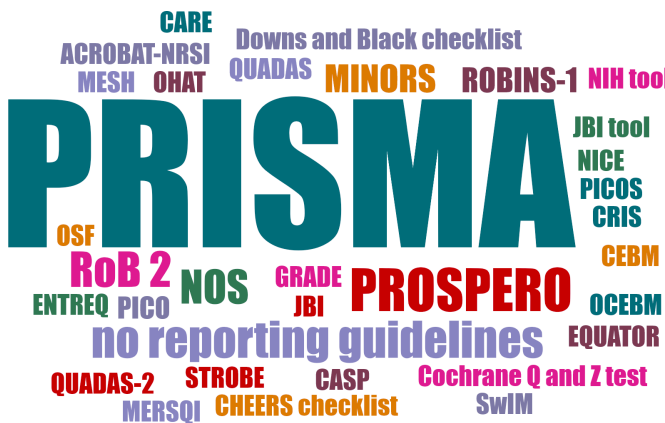

Figure 11: Quality indicators breakdown.

studies by degree of invasiveness is useful, because there are a number of different types of 3D-printed tools that can be accurately categorized by degree of invasiveness. We start with the non-invasive devices, which are shown in Table 1 and represent the largest group in our analysis. This grade of invasiveness is mostly represented by 3D-printed models. These models may be easier to produce and use, with fewer safety requirements, as these tools are not in physical contact with the patient [21]. The models are mainly used for pre-surgical planning. Concerning the accuracy, which is an im-

portant factor when planning a surgery with these devices, is to correctly represent the anatomy. Studies reported that the accuracy of these models was comparable or better than conventional methods [51]. This can help the surgeon to understand the patient’s anatomy or pathology better [128]. As a result, authors found that preparing a surgical intervention with 3D-printed models beforehand, can lead to less blood loss during surgery, a reduced surgical time and often a better surgical outcome, which has been shown in studies in various medical specialties [73]. Models can also be used for patient counseling, with a patient-specific model it is easier to explain surgical procedures to the patient [37]. Another use of 3D-printed models is for teaching students. Although these models seem to be cheaper, care should be taken to produce anatomically accurate models. No study was found that reported on the accuracy of teaching models. More attention should be paid on this topic. As technology progresses and the accuracy of these models is validated these 3D printed models could be used as an additional form of imaging technique in medicine. 3D-printed on-body devices such as prostheses or orthoses are represented in Table 2. Only 26 reviews were categorized here. Orthopedics is the dominant field in this type of invasiveness as this is the area where the need for prostheses is the greatest. Only one study compared these devices to conventional devices [121]. As a result of that more studies need to be conducted to assess the real mechanical properties, costs and wearability of these custom-made prostheses. Invasive devices can be categorized as invasive non-permanent devices (see Table 3) and invasive permanent devices (see Table 4). Here, only a minority of reviews could be classified in these categories. In invasive permanent devices, which are implants, the fields of neurosurgery and oral and maxillofacial surgery are the most mentioned ones. Customizing implants in these fields can be very useful for the treatment of patients and long-term outcomes. However, less is reported about the fabrication of these implants and how long it takes to produce an implant. Another issue is the sterilization process and

the risk of infection when using 3D-printed implants. It is not clear yet which materials are the best that combine printability, sterilization and durability. Furthermore, none of the studies reported on the long-term effects of having 3D-printed implants in the body especially the ones made of different types of polymers. Further studies need to be conducted on what is the tolerability of these (polymer) implants' risk of infection and the lifespan of 3D-printed custom-made implants. As a result, standardized safety regulations need to be assessed for these new tools. Invasive non-permanent devices are tools like cutting guides or screw guides that are designed to stay within the body but only during the period of the surgery and are then removed. Nothing was found about the sterilization process or the risk of infection in the literature, which has to be assessed in future studies. But literature suggests that spinal surgeries using screw guides have higher screw placement accuracy, which leads to a better surgical outcome [59]. After solving these problems and implementing safety regulations, these cutting guides could be used in standard surgical procedures in the future. In general, 3D-printed invasive devices are not yet used in standard medical practices as technology needs to be more sophisticated and more safety studies need to be done. It is difficult to make a statement about costs and time as the information in the literature is not standardized. Take the production of a model as an example. The materials might be cheaper but the work process is not fully described yet. We know that the data is derived from, for example, MRI or CT files and then a virtual model is produced or printed [138]. But the time it takes to produce the implant from acquiring images of the patient to the actual 3D-printed piece and the work of additional staff, such as the technician, has to be considered. This has also to be taken into account in terms of cost-effectiveness, as there are several steps involved in the printing process. In terms of time, sometimes the total time for the whole surgery using 3DP was given, and sometimes how much time was saved, but it was not exactly compared to surgery without using 3DP. Concerning materials and printing techniques there has to be a differentiation made between conventional 3DP with non-organic materials such as polymers and bioprinting with organic materials or even living cells. While bioprinting is still in its infancy, conventional 3DP is the more mature technology and is already being used in some medical settings. For conventional printing, materials like ceramics, polymers and metals are used [145]. Specifically, ABS, photopolymers and PLA are the most commonly mentioned materials. Most of these materials do not have antibacterial properties itself, the sterilisation process, as mentioned above, needs to be evaluated, but nothing substantial has been found in the literature. For the conventional 3DP technology, SLA and FFF seem to be the most used [149]. Multiple other techniques have been reported and the type of tool they are used for. However, we will not go into detail on these as this study focuses on the use of 3DP in different medical specialties. It has been shown that 3DP in general is used in various surgical fields. As the problems with the printing process, materials and costs are solved this technology could be promising for future medical practice.

## 4.1 Limitations

A limitation of our study is that our search was limited to the PubMed database. As a result, it is possible that some relevant studies may have been missed and are therefore not addressed in this meta-review.

## 5 CONCLUSION

In recent years, the scope of research and use of 3DP has continuously increased in the medical field. It offers a wide range of applications in pre-operative surgical planning, patient counseling and educational purposes. With its ability to produce patient-specific models, prostheses, surgical guides and implants, opening the door to personalized medicine. This can be seen in various medical fields, especially in surgical applications and medical education. The medical fields most frequently mentioned in the literature include orthopedics, oral and maxillofacial surgery, cardiology and neurosurgery. Non-bioprinting materials often include ABS, photopolymers and PLA. The literature suggests that surgical procedures benefit from reduced operating time, reduced blood loss, minimized fluoroscopy time and improved surgical outcome. In terms of time and cost, no consistent and accurate statement can be made due to the heterogeneity of the available data. Countries such as the United States, Australia and China have been at the forefront of these innovations. Future research and larger studies are needed to evaluate the clinical benefits of 3DP applications in medicine.

## ACKNOWLEDGMENTS

This work was supported by the REACT-EU project KITE (Plattform für KI-Translation Essen, EFRE-0801977, <https://kite.ikim.nrw/>), FWF enFaced 2.0 (KLI 1044, <https://enfaced2.ikim.nrw/>), AutoImplant (<https://autoimplant.ikim.nrw/>) and „NUM 2.0“ (FKZ: 01KX2121). Behrus Puladi was funded by the Medical Faculty of RWTH Aachen University as part of the Clinician Scientist Program. Furthermore, we acknowledge the *Center for Virtual and Extended Reality in Medicine* (ZvRM, <https://zvrm.ume.de/>) of the University Hospital Essen.

## REFERENCES

- [1] I. Chao, J. Young, J. Coles-Black, J. Chuen, L. Weinberg, and C. Rachbuch, "The application of three-dimensional printing technology in anaesthesia: A systematic review," *Anaesthesia*, vol. 72, no. 5, pp. 641–650, 2017.
- [2] C. Batteux, M. A. Haidar, and D. Bonnet, "3d-printed models for surgical planning in complex congenital heart diseases: A systematic review," *Frontiers in pediatrics*, vol. 7, p. 23, 2019.
- [3] B. Bernhard *et al.*, "Imaging-based, patient-specific three-dimensional printing to plan, train, and guide cardiovascular interventions: A systematic review and meta-analysis," *Heart, Lung and Circulation*, 2022.

- [4] L. F. C. Boll, G. O. Rodrigues, C. G. Rodrigues, F. L. Bertollo, M. C. Irigoyen, and S. Goldmeier, "Using a 3d printer in cardiac valve surgery: A systematic review," *Revista da Associação Médica Brasileira*, vol. 65, pp. 818–824, 2019.
- [5] D. DeCampos *et al.*, "3d printing for left atrial appendage closure: A meta-analysis and systematic review," *International Journal of Cardiology*, 2022.
- [6] I. Lau and Z. Sun, "Three-dimensional printing in congenital heart disease: A systematic review," *Journal of medical radiation sciences*, vol. 65, no. 3, pp. 226–236, 2018.
- [7] I. W. W. Lau and Z. Sun, "Dimensional accuracy and clinical value of 3d printed models in congenital heart disease: A systematic review and meta-analysis," *Journal of clinical medicine*, vol. 8, no. 9, p. 1483, 2019.
- [8] V. Tuncay and P. van Ooijen, "3d printing for heart valve disease: A systematic review," *European radiology experimental*, vol. 3, no. 1, pp. 1–10, 2019.
- [9] C. Wang *et al.*, "3d printing in adult cardiovascular surgery and interventions: A systematic review," *Journal of Thoracic Disease*, vol. 12, no. 6, p. 3227, 2020.
- [10] S. Celi *et al.*, "3d printing in modern cardiology," *Current Pharmaceutical Design*, vol. 27, no. 16, pp. 1918–1930, 2021.
- [11] J. Illi *et al.*, "Translating imaging into 3d printed cardiovascular phantoms: A systematic review of applications, technologies, and validation," *Basic to Translational Science*, vol. 7, no. 10, pp. 1050–1062, 2022.
- [12] C. Tarabanis, J. Klapholz, S. Zahid, and L. Jankelson, "A systematic review of the use of 3d printing in left atrial appendage occlusion procedures," *Journal of cardiovascular electrophysiology*, vol. 33, pp. 2367–2374, 11 2022, ISSN: 1540-8167 (Electronic). DOI: [10.1111/jce.15658](https://doi.org/10.1111/jce.15658). [Online]. Available: <https://pubmed.ncbi.nlm.nih.gov/35989544/>.
- [13] P. Xenofontos, R. Zamani, and M. Akrami, "The application of 3d printing in preoperative planning for transcatheter aortic valve replacement: A systematic review," *Biomedical engineering online*, vol. 21, p. 59, 1 2022, ISSN: 1475-925X (Electronic). DOI: [10.1186/s12938-022-01029-z](https://doi.org/10.1186/s12938-022-01029-z). [Online]. Available: <https://pubmed.ncbi.nlm.nih.gov/36050722/>.
- [14] G. To *et al.*, "A systematic review of the application of 3d-printed models to colorectal surgical training," *Techniques in coloproctology*, vol. 27, pp. 257–270, 4 2023, ISSN: 1128-045X (Electronic). DOI: [10.1007/s10151-023-02757-7](https://doi.org/10.1007/s10151-023-02757-7). [Online]. Available: <https://pubmed.ncbi.nlm.nih.gov/36738361/>.
- [15] W. M. M. Bakdach and R. Hadad, "Linear and angular transfer accuracy of labial brackets using three dimensional-printed indirect bonding trays: A systematic review and meta-analysis," *International Orthodontics*, vol. 20, no. 1, p. 100 612, 2022.
- [16] Y. Etemad-Shahidi, O. B. Qallandar, J. Evenden, F. Alifui-Segbaya, and K. E. Ahmed, "Accuracy of 3-dimensionally printed full-arch dental models: A systematic review," *Journal of clinical medicine*, vol. 9, no. 10, p. 3357, 2020.
- [17] I. A. Tsolakis, S. Gizani, N. Panayi, G. Antonopoulos, and A. I. Tsolakis, "Three-dimensional printing technology in orthodontics for dental models: A systematic review," *Children*, vol. 9, no. 8, p. 1106, 2022.
- [18] J. Thakur, S. Parlani, S. Shivakumar, and K. Jajoo, "Accuracy of marginal fit of an implant-supported framework fabricated by 3d printing versus subtractive manufacturing technique: A systematic review and meta-analysis," *The Journal of prosthetic dentistry*, vol. 129, pp. 301–309, 2 2023, ISSN: 1097-6841 (Electronic). DOI: [10.1016/j.prosdent.2021.05.010](https://doi.org/10.1016/j.prosdent.2021.05.010). [Online]. Available: <https://pubmed.ncbi.nlm.nih.gov/34147238/>.
- [19] J. S. Witowski *et al.*, "3d printing in liver surgery: A systematic review," *Telemedicine journal and e-health: the official journal of the American Telemedicine Association*, vol. 23, pp. 943–947, 12 2017, ISSN: 1556-3669 (Electronic). DOI: [10.1089/tmj.2017.0049](https://doi.org/10.1089/tmj.2017.0049). [Online]. Available: <https://pubmed.ncbi.nlm.nih.gov/28530492/>.
- [20] P. Tack, J. Victor, P. Gemmel, and L. Annemans, "3d-printing techniques in a medical setting: A systematic literature review," *Biomedical engineering online*, vol. 15, no. 1, pp. 1–21, 2016.
- [21] L. E. Diment, M. S. Thompson, and J. H. Bergmann, "Clinical efficacy and effectiveness of 3d printing: A systematic review," *BMJ open*, vol. 7, no. 12, e016891, 2017.
- [22] D. S. Soon, M. P. Chae, C. H. Pilgrim, W. M. Rozen, R. T. Spychal, and D. J. Hunter-Smith, "3d haptic modelling for preoperative planning of hepatic resection: A systematic review," *Annals of Medicine and Surgery*, vol. 10, pp. 1–7, 2016.
- [23] C. Serrano, S. Fontenay, H. van den Brink, J. Pineau, P. Prognon, and N. Martelli, "Evaluation of 3d printing costs in surgery: A systematic review," *International journal of technology assessment in health care*, vol. 36, no. 4, pp. 349–355, 2020.
- [24] N. Martelli *et al.*, "Advantages and disadvantages of 3-dimensional printing in surgery: A systematic review," *Surgery*, vol. 159, no. 6, pp. 1485–1500, 2016.
- [25] T. Kermavnar, A. Shannon, and L. W. O'Sullivan, "The application of additive manufacturing/3d printing in ergonomic aspects of product design: A systematic review," *Applied Ergonomics*, vol. 97, p. 103 528, 2021.
- [26] N. Ibrahim, T. Jovic, Z. M. Jessop, and I. S. Whitaker, "Innovation in a time of crisis: A systematic review of three-dimensional printing in the covid-19 pandemic," *3D Printing and Additive Manufacturing*, vol. 8, no. 3, pp. 201–215, 2021.
- [27] J. Rzeszuto, P. Kaczor, B. Kosztulska, I. Handzlik, S. Suwała, and R. Junik, "Is additive manufacturing a magic bullet to resupply lacking ppe? producing respirators and face shields during covid-19 pandemic: A systematic review," *Polymers in Medicine*, vol. 51, no. 2, pp. 91–102, 2021.
- [28] E. R. Perica and Z. Sun, "A systematic review of three-dimensional printing in liver disease," *Journal of Digital Imaging*, vol. 31, no. 5, pp. 692–701, 2018.



- [29] C. Tenewitz, R. T. Le, M. Hernandez, S. Baig, and T. E. Meyer, "Systematic review of three-dimensional printing for simulation training of interventional radiology trainees," *3D Printing in Medicine*, vol. 7, no. 1, pp. 1–10, 2021.
- [30] Z. Ye *et al.*, "The role of 3d printed models in the teaching of human anatomy: A systematic review and meta-analysis," *BMC medical education*, vol. 20, no. 1, pp. 1–9, 2020.
- [31] C. Fleming, M. S. Sadaghiani, M. A. Stellon, and R. Javan, "Effectiveness of three-dimensionally printed models in anatomy education for medical students and resident physicians: Systematic review and meta-analysis," *Journal of the American College of Radiology*, vol. 17, no. 10, pp. 1220–1229, 2020.
- [32] E. Brumpt, E. Bertin, L. Tatu, and A. Louvrier, "3d printing as a pedagogical tool for teaching normal human anatomy: A systematic review," *BMC Medical Education*, vol. 23, no. 1, p. 783, 2023.
- [33] D Salazar, M Thompson, A Rosen, and J Zuniga, "Using 3d printing to improve student education of complex anatomy: A systematic review and meta-analysis.," *Medical science educator*, vol. 32, pp. 1209–1218, 5 2022, ISSN: 2156-8650 (Electronic). DOI: [10.1007/s40670-022-01595-w](https://doi.org/10.1007/s40670-022-01595-w). [Online]. Available: <https://pubmed.ncbi.nlm.nih.gov/36276759/>.
- [34] B. Langridge, S. Momin, B. Coumbe, E. Woin, M. Griffin, and P. Butler, "Systematic review of the use of 3-dimensional printing in surgical teaching and assessment," *Journal of surgical education*, vol. 75, no. 1, pp. 209–221, 2018.
- [35] J. E. Blohm, P. A. Salinas, M. J. Avila, S. R. Barber, M. E. Weinand, and T. M. Dumont, "Three-dimensional printing in neurosurgery residency training: A systematic review of the literature," *World neurosurgery*, 2021.
- [36] W. Czyżewski *et al.*, "Low-cost cranioplasty—a systematic review of 3d printing in medicine," *Materials*, vol. 15, no. 14, p. 4731, 2022.
- [37] L. S. McGuire, A. Fuentes, and A. Alaraj, "Three-dimensional modeling in training, simulation, and surgical planning in open vascular and endovascular neurosurgery: A systematic review of the literature," *World Neurosurgery*, vol. 154, pp. 53–63, 2021.
- [38] M. Randazzo, J. M. Pisapia, N. Singh, and J. P. Thawani, "3d printing in neurosurgery: A systematic review," *Surgical neurology international*, vol. 7, no. Suppl 33, S801, 2016.
- [39] M. Waqas *et al.*, "Design and physical properties of 3-dimensional printed models used for neurointervention: A systematic review of the literature," *Neurosurgery*, vol. 87, no. 4, E445–E453, 2020.
- [40] S. Emile and S. Wexner, "Systematic review of the applications of three-dimensional printing in colorectal surgery," *Colorectal Disease*, vol. 21, no. 3, pp. 261–269, 2019.
- [41] Y. Jiang, H. Zeng, Z. Zhu, J. Chen, and H. Chen, "Three-dimensional printing assisted laparoscopic partial nephrectomy vs. conventional nephrectomy in patients with complex renal tumor: A systematic review and meta-analysis," *Frontiers in oncology*, vol. 10, p. 551985, 2020.
- [42] A. Przedlacka, G. Pellino, J. Fletcher, F. Bello, P. P. Tekkis, and C. Kontovounisios, "Current and future role of three-dimensional modelling technology in rectal cancer surgery: A systematic review," *World Journal of Gastrointestinal Surgery*, vol. 13, no. 12, p. 1754, 2021.
- [43] W. W. Yen, N. Baksh, V. Gallo, Z. Jamil, E. H. Tischler, and A. V. Maheshwari, "Current concepts and advances of three-dimensional printing in reconstructive musculoskeletal oncology: A systematic review," *Journal of Long-Term Effects of Medical Implants*, vol. 31, no. 4, 2021.
- [44] M. K. Rooney *et al.*, "Three-dimensional printing in radiation oncology: A systematic review of the literature," *Journal of applied clinical medical physics*, vol. 21, no. 8, pp. 15–26, 2020.
- [45] R. Tino, A. Yeo, M. Leary, M. Brandt, and T. Kron, "A systematic review on 3d-printed imaging and dosimetry phantoms in radiation therapy," *Technology in cancer research & treatment*, vol. 18, p. 1533033819870208, 2019.
- [46] B. P. Fahimian *et al.*, "3d printing in brachytherapy: A systematic review of gynecological applications," *Brachytherapy*, 2023.
- [47] S. Gernandt, O. Tomasella, P. Scolozzi, and M. Felon, "Contribution of 3d printing for the surgical management of jaws cysts and benign tumors: A systematic review of the literature.," *Journal of Stomatology, Oral and Maxillofacial Surgery*, p. 101433, 2023.
- [48] C. A. Jacobs and A. Y. Lin, "A new classification of three-dimensional printing technologies: Systematic review of three-dimensional printing for patient-specific craniomaxillofacial surgery," *Plastic and reconstructive surgery*, vol. 139, no. 5, pp. 1211–1220, 2017.
- [49] K. S. Ahmed, H. Ibad, Z. A. Suchal, and A. K. Gosain, "Implementation of 3d printing and computer-aided design and manufacturing (cad/cam) in craniofacial reconstruction," *Journal of Craniofacial Surgery*, vol. 33, no. 6, pp. 1714–1719, 2022.
- [50] M. O. Alhabshi *et al.*, "Role of three-dimensional printing in treatment planning for orthognathic surgery: A systematic review.," *Cureus*, vol. 15, e47979, 10 2023, ISSN: 2168-8184 (Print). DOI: [10.7759/cureus.47979](https://doi.org/10.7759/cureus.47979). [Online]. Available: <https://pubmed.ncbi.nlm.nih.gov/38034130/>.
- [51] X. Wang, S. Shujaat, E. Shaheen, and R. Jacobs, "Accuracy of desktop versus professional 3d printers for maxillofacial model production. a systematic review and meta-analysis," *Journal of Dentistry*, vol. 112, p. 103741, 2021.
- [52] O. Oth, V. Durieux, M.-F. Orellana, and R. Glineur, "Genioplasty with surgical guide using 3d-printing technology: A systematic review," *Journal of clinical and experimental dentistry*, vol. 12, no. 1, e85, 2020.
- [53] A. Murray-Douglass, C. Snoswell, C. Winter, and R. Harris, "Three-dimensional (3d) printing for post-traumatic orbital reconstruction, a systematic review

- and meta-analysis," *British Journal of Oral and Maxillofacial Surgery*, 2022.
- [54] A. K. Singh, N. Khanal, R. Chaulagain, N. Sharma, and F. M. Thieringer, "Is the pre-shaping of an orbital implant on a patient-specific 3d-printed model advantageous compared to conventional free-hand shaping? a systematic review and meta-analysis," *Journal of clinical medicine*, vol. 12, 10 2023, ISSN: 2077-0383 (Print). DOI: [10.3390/jcm12103426](https://doi.org/10.3390/jcm12103426). [Online]. Available: <https://pubmed.ncbi.nlm.nih.gov/37240532/>.
- [55] M. Meglioli, A. Naveau, G. M. Macaluso, and S. Catros, "3d printed bone models in oral and cranio-maxillofacial surgery: A systematic review," *3D printing in medicine*, vol. 6, no. 1, pp. 1–19, 2020.
- [56] C. Serrano, H. van den Brink, J. Pineau, P. Prognon, and N. Martelli, "Benefits of 3d printing applications in jaw reconstruction: A systematic review and meta-analysis," *Journal of Cranio-Maxillofacial Surgery*, vol. 47, no. 9, pp. 1387–1397, 2019.
- [57] J. Cao, H. Zhu, and C. Gao, "A systematic review and meta-analysis of 3d printing technology for the treatment of acetabular fractures," *BioMed Research International*, vol. 2021, 2021.
- [58] I. Aguado-Maestro, C. Simón-Pérez, M. García-Alonso, J. J. Ailagas-De Las Heras, and E. Paredes-Herrero, "Clinical applications of "in-hospital" 3d printing in hip surgery: A systematic narrative review," *Journal of Clinical Medicine*, vol. 13, no. 2, p. 599, 2024.
- [59] C. D. Lopez *et al.*, "Three-dimensional printing for preoperative planning and pedicle screw placement in adult spinal deformity: A systematic review," *Global Spine Journal*, vol. 11, no. 6, pp. 936–949, 2021.
- [60] S. Yang, H. Lin, and C. Luo, "Meta-analysis of 3d printing applications in traumatic fractures," *Frontiers in Surgery*, vol. 8, 2021.
- [61] G. Shi, W. Liu, Y. Shen, and X. Cai, "3d printing-assisted extended lateral approach for displaced intra-articular calcaneal fractures: A systematic review and meta-analysis," *Journal of Orthopaedic Surgery and Research*, vol. 16, no. 1, pp. 1–9, 2021.
- [62] G. Papotto *et al.*, "Use of 3d printing and pre-contouring plate in the surgical planning of acetabular fractures: A systematic review," *Orthopaedics & Traumatology: Surgery & Research*, p. 103111, 2021.
- [63] A. Hecker *et al.*, "Clinical applications of three-dimensional printing in upper extremity surgery: A systematic review," *Journal of Personalized Medicine*, vol. 13, no. 2, p. 294, 2023.
- [64] M. González-Alonso, M. Hermida-Sánchez, P. Martínez-Seijas, and A. Ruano-Ravina, "Application of 3d printing in the treatment of appendicular skeleton fractures: Systematic review and meta-analysis," *Journal of Orthopaedic Research*, vol. 39, no. 10, pp. 2083–2092, 2021.
- [65] K. Li, Z. Liu, X. Li, and J. Wang, "3d printing-assisted surgery for proximal humerus fractures: A systematic review and meta-analysis," *European Journal of Trauma and Emergency Surgery*, pp. 1–11, 2022.
- [66] M. Jiang, G. Chen, J. Coles-Black, J. Chuen, and A. Hardidge, "Three-dimensional printing in orthopaedic preoperative planning improves intraoperative metrics: A systematic review," *ANZ journal of surgery*, vol. 90, pp. 243–250, 3 2020, ISSN: 1445-2197 (Electronic). DOI: [10.1111/ans.15549](https://doi.org/10.1111/ans.15549). [Online]. Available: <https://pubmed.ncbi.nlm.nih.gov/31701621/>.
- [67] G. Anzillotti *et al.*, "Using three-dimensional printing technology to solve complex primary total hip arthroplasty cases: Do we really need custom-made guides and templates? a critical systematic review on the available evidence," *Journal of Clinical Medicine*, vol. 13, no. 2, p. 474, 2024.
- [68] B. Wilcox, R. J. Mobbs, A.-M. Wu, and K. Phan, "Systematic review of 3d printing in spinal surgery: The current state of play," *Journal of Spine Surgery*, vol. 3, no. 3, p. 433, 2017.
- [69] J. Wang *et al.*, "Comparison of the feasibility of 3d printing technology in the treatment of pelvic fractures: A systematic review and meta-analysis of randomized controlled trials and prospective comparative studies," *European Journal of Trauma and Emergency Surgery*, vol. 47, no. 6, pp. 1699–1712, 2021.
- [70] H. Banierink *et al.*, "Does 3d-assisted operative treatment of pelvic ring injuries improve patient outcome?—a systematic review of the literature," *Journal of personalized medicine*, vol. 11, no. 9, p. 930, 2021.
- [71] A. K.-X. Lee, T.-L. Lin, C.-J. Hsu, Y.-C. Fong, H.-T. Chen, and C.-H. Tsai, "Three-dimensional printing and fracture mapping in pelvic and acetabular fractures: A systematic review and meta-analysis," *Journal of Clinical Medicine*, vol. 11, no. 18, p. 5258, 2022.
- [72] D. Zhu *et al.*, "The efficacy of 3d printing-assisted surgery in treating distal radius fractures: Systematic review and meta-analysis," *Journal of Comparative Effectiveness Research*, vol. 9, no. 13, pp. 919–931, 2020.
- [73] N. Assink *et al.*, "Does 3d-assisted surgery of tibial plateau fractures improve surgical and patient outcome? a systematic review of 1074 patients," *European Journal of Trauma and Emergency Surgery*, pp. 1–13, 2021.
- [74] Y. He, P. Zhou, and C. He, "Clinical efficacy and safety of surgery combined with 3d printing for tibial plateau fractures: Systematic review and meta-analysis," *Annals of Translational Medicine*, vol. 10, no. 7, 2022.
- [75] L. Xie, C. Chen, Y. Zhang, W. Zheng, H. Chen, and L. Cai, "Three-dimensional printing assisted orif versus conventional orif for tibial plateau fractures: A systematic review and meta-analysis," *International Journal of Surgery*, vol. 57, pp. 35–44, 2018.
- [76] L. Wood and Z. Ahmed, "Does using 3d printed models for pre-operative planning improve surgical outcomes of foot and ankle fracture fixation? a systematic review and meta-analysis," *European journal of trauma and emergency surgery : official publication of the European Trauma Society*, 2022, ISSN: 1863-9941 (Electronic). DOI: [10.1007/s00068-022-02176-7](https://doi.org/10.1007/s00068-022-02176-7). [Online]. Available: <https://pubmed.ncbi.nlm.nih.gov/36418394/>.

- [77] J. V. M. Quiñones, J. O. Martínez, D. P. Arias, M. B. Lecina, F. C. Rossi, and R. A. Calvo, "Systematic review of the utility and limits of 3d printing in spine surgery," *Neurocirugía (English Edition)*, 2023.
- [78] A. Omari, M. Frændø, M. S. Sørensen, S. A. W. Andersen, and A. Frithioff, "The cutting edge of customized surgery: 3d-printed models for patient-specific interventions in otology and auricular management—a systematic review," *European Archives of Oto-Rhino-Laryngology*, pp. 1–20, 2022.
- [79] P Canzi *et al.*, "New frontiers and emerging applications of 3d printing in ent surgery: A systematic review of the literature," *Acta Otorhinolaryngologica Italica*, vol. 38, no. 4, p. 286, 2018.
- [80] G Chen, M Jiang, J. Coles-Black, K Mansour, J. Chuen, and D Amott, "Three-dimensional printing as a tool in otolaryngology training: A systematic review," *The Journal of Laryngology & Otology*, vol. 134, no. 1, pp. 14–19, 2020.
- [81] M. A. de Souza, R. F. Bento, P. T. Lopes, D. M. de Pinto Rangel, and L. Formighieri, "Three-dimensional printing in otolaryngology education: A systematic review," *European Archives of Oto-Rhino-Laryngology*, pp. 1–11, 2021.
- [82] A. Frithioff, M. Frændø, D. B. Pedersen, M. S. Sørensen, and S. A. Wuyts Andersen, "3d-printed models for temporal bone surgical training: A systematic review," *Otolaryngology–Head and Neck Surgery*, vol. 165, no. 5, pp. 617–625, 2021.
- [83] C. J. Hong *et al.*, "Clinical applications of three-dimensional printing in otolaryngology–head and neck surgery: A systematic review," *The Laryngoscope*, vol. 129, no. 9, pp. 2045–2052, 2019.
- [84] G. Leung *et al.*, "Systematic review and meta-analysis of 3d-printing in otolaryngology education," *International Journal of Pediatric Otorhinolaryngology*, p. 111 083, 2022.
- [85] J. A. Stramiello, R. Saddawi-Konefka, J. Ryan, and M. T. Brigger, "The role of 3d printing in pediatric airway obstruction: A systematic review," *International Journal of Pediatric Otorhinolaryngology*, vol. 132, p. 109 923, 2020.
- [86] C. Langdon *et al.*, "3d printing as surgical planning and training in pediatric endoscopic skull base surgery-systematic review and practical example," *International Journal of Pediatric Otorhinolaryngology*, p. 111 543, 2023.
- [87] A Yang, K Panchendrabose, C Leong, S. S. Raza, and S Joharifard, "The utility of three-dimensional modeling and printing in pediatric surgical patient and family education: A systematic review," *3D printing in medicine*, vol. 10, p. 1, 1 2024, ISSN: 2365-6271 (Electronic). DOI: [10.1186/s41205-023-00198-4](https://doi.org/10.1186/s41205-023-00198-4). [Online]. Available: <https://pubmed.ncbi.nlm.nih.gov/38170262/>.
- [88] A. Asif, E. Lee, M. Caputo, G. Biglino, and A. I. U. Shearn, "Role of 3d printing technology in paediatric teaching and training: A systematic review," *BMJ Paediatrics Open*, vol. 5, no. 1, 2021.
- [89] C. A. Francoise, A. M. Sescleifer, W. T. King, and A. Y. Lin, "Three-dimensional printing in medicine: A systematic review of pediatric applications," *Pediatric Research*, vol. 89, no. 3, pp. 415–425, 2021.
- [90] M. Raza, D. Murphy, and Y. Gelfer, "The effect of three-dimensional (3d) printing on quantitative and qualitative outcomes in paediatric orthopaedic osteotomies: A systematic review," *EFORT Open Reviews*, vol. 6, no. 2, pp. 130–138, 2021.
- [91] S. Anand *et al.*, "Utility of three-dimensional printing for preoperative assessment of children with extracranial solid tumors: A systematic review," *Pediatric Reports*, vol. 14, no. 1, pp. 32–39, 2022.
- [92] P. Katiyar, V. Boddapati, J. Coury, B. Roye, M. Vitale, and L. Lenke, "Three-dimensional printing applications in pediatric spinal surgery: A systematic review," *Global Spine Journal*, p. 21 925 682 231 182 341, 2023.
- [93] A. J. Bauermeister, A. Zuriarrain, and M. I. Newman, "Three-dimensional printing in plastic and reconstructive surgery: A systematic review," *Annals of plastic surgery*, vol. 77, no. 5, pp. 569–576, 2016.
- [94] F. R. Virani, E. C. Chua, M. R. Timbang, T.-y. Hsieh, and C. W. Senders, "Three-dimensional printing in cleft care: A systematic review," *The Cleft Palate-Craniofacial Journal*, vol. 59, no. 4, pp. 484–496, 2022.
- [95] C. Morgan, C. Khatri, S. A. Hanna, H. Ashrafian, and K. M. Sarraf, "Use of three-dimensional printing in preoperative planning in orthopaedic trauma surgery: A systematic review and meta-analysis," *World journal of orthopedics*, vol. 11, no. 1, p. 57, 2020.
- [96] D.-P. Tu, Y.-K. Yu, Z. Liu, W.-K. Zhang, X. Fan, and C. Xu, "Three-dimensional printing combined with open reduction and internal fixation versus open reduction and internal fixation in the treatment of acetabular fractures: A systematic review and meta-analysis," *Chinese Journal of Traumatology*, vol. 24, no. 03, pp. 159–168, 2021.
- [97] K Yammine, J Karbala, A Maalouf, J Daher, and C Assi, "Clinical outcomes of the use of 3d printing models in fracture management: A meta-analysis of randomized studies.," *European journal of trauma and emergency surgery : official publication of the European Trauma Society*, vol. 48, pp. 3479–3491, 5 2022, ISSN: 1863-9941 (Electronic). DOI: [10.1007/s00068-021-01758-1](https://doi.org/10.1007/s00068-021-01758-1). [Online]. Available: <https://pubmed.ncbi.nlm.nih.gov/34383092/>.
- [98] G. E. Cacciamani *et al.*, "Impact of three-dimensional printing in urology: State of the art and future perspectives. a systematic review by esut-yauwp group," *European urology*, vol. 76, no. 2, pp. 209–221, 2019.
- [99] J. Coles-Black *et al.*, "3d printed patient-specific prostate cancer models to guide nerve-sparing robot-assisted radical prostatectomy: A systematic review," *Journal of Robotic Surgery*, pp. 1–10, 2022.
- [100] E. Checucci, S. De Cillis, and F. Porpiglia, "3d-printed models and virtual reality as new tools for image-guided robot-assisted nephron-sparing surgery: A systematic review of the newest evidences," *Current Opinion in Urology*, vol. 30, no. 1, pp. 55–64, 2020.

- [101] C. Lupulescu and Z. Sun, "A systematic review of the clinical value and applications of three-dimensional printing in renal surgery," *Journal of Clinical Medicine*, vol. 8, no. 7, p. 990, 2019.
- [102] Z. Sun and D. Liu, "A systematic review of clinical value of three-dimensional printing in renal disease," *Quantitative imaging in medicine and surgery*, vol. 8, no. 3, p. 311, 2018.
- [103] J. Coles-Black, T. Barber, D. Bolton, and J. Chuen, "A systematic review of three-dimensional printed template-assisted physician-modified stent grafts for fenestrated endovascular aneurysm repair," *Journal of vascular surgery*, vol. 74, no. 1, pp. 296–306, 2021.
- [104] Z. Sun and S.-Y. Lee, "A systematic review of 3-d printing in cardiovascular and cerebrovascular diseases," *Anatolian Journal of Cardiology*, vol. 17, no. 6, p. 423, 2017.
- [105] C. H. A. Tam, Y. C. Chan, Y. Law, and S. W. K. Cheng, "The role of three-dimensional printing in contemporary vascular and endovascular surgery: A systematic review," *Annals of vascular surgery*, vol. 53, pp. 243–254, 2018.
- [106] J. Coles-Black, D. Bolton, D. Robinson, and J. Chuen, "Utility of 3d printed abdominal aortic aneurysm phantoms: A systematic review," *ANZ journal of surgery*, vol. 91, no. 9, pp. 1673–1681, 2021.
- [107] K. Jie, P. Deng, H. Cao, W. Feng, J. Chen, and Y. Zeng, "Prosthesis design of animal models of periprosthetic joint infection following total knee arthroplasty: A systematic review," *PloS one*, vol. 14, no. 10, e0223402, 2019.
- [108] N. Wake, J. E. Nussbaum, M. I. Elias, C. V. Nikas, and M. A. Bjurlin, "3d printing, augmented reality, and virtual reality for the assessment and management of kidney and prostate cancer: A systematic review," *Urology*, vol. 143, pp. 20–32, 2020.
- [109] J. M. Escandón, C. S. Morrison, H. N. Langstein, P. Ciudad, G. Del Corral, and O. J. Manrique, "Applications of three-dimensional surgical planning in facial feminization surgery: A systematic review," *Journal of Plastic, Reconstructive & Aesthetic Surgery*, 2022.
- [110] S. Wang *et al.*, "The use of three-dimensional visualization techniques for prostate procedures: A systematic review," *European Urology Focus*, vol. 7, no. 6, pp. 1274–1286, 2021.
- [111] V. A. Santos, M. P. Barreira, and K. R. Saad, "Technological resources for teaching and learning about human anatomy in the medical course: Systematic review of literature," *Anatomical Sciences Education*, vol. 15, no. 2, pp. 403–419, 2022.
- [112] P. Grall, J. Ferri, and R. Nicot, "Surgical training 2.0: A systematic approach reviewing the literature focusing on oral maxillofacial surgery—part i," *Journal of Stomatology, Oral and Maxillofacial Surgery*, vol. 122, no. 4, pp. 411–422, 2021.
- [113] R. de Muinck Keizer, K. Lechner, M. Mulders, N. Schep, D. Eygendaal, and J. Goslings, "Three-dimensional virtual planning of corrective osteotomies of distal radius malunions: A systematic review and meta-analysis," *Strategies in trauma and limb reconstruction*, vol. 12, no. 2, pp. 77–89, 2017.
- [114] R. Zhang, J. Lin, F. Chen, W. Liu, and M. Chen, "Clinical and radiological outcomes in three-dimensional printing assisted revision total hip and knee arthroplasty: A systematic review," *Journal of Orthopaedic Surgery and Research*, vol. 16, no. 1, pp. 1–10, 2021.
- [115] E. Tsoukala, I. Lyros, A. I. Tsolakis, M. P. Maroulakos, and I. A. Tsolakis, "Direct 3d-printed orthodontic retainers. a systematic review.," *Children (Basel, Switzerland)*, vol. 10, 4 2023, ISSN: 2227-9067 (Print). DOI: [10.3390/children10040676](https://doi.org/10.3390/children10040676). [Online]. Available: <https://pubmed.ncbi.nlm.nih.gov/37189925/>.
- [116] H. Dewan, "Clinical effectiveness of 3d-milled and 3d-printed zirconia prosthesis—a systematic review and meta-analysis," *Biomimetics*, vol. 8, no. 5, p. 394, 2023.
- [117] H. Y. Mai, H. N. Mai, H. J. Kim, J. Lee, and D. H. Lee, "Accuracy of removable partial denture metal frameworks fabricated by computer-aided design/ computer-aided manufacturing method: A systematic review and meta-analysis.," *The journal of evidence-based dental practice*, vol. 22, p. 101 681, 3 2022, ISSN: 1532-3390 (Electronic). DOI: [10.1016/j.jebdp.2021.101681](https://doi.org/10.1016/j.jebdp.2021.101681). [Online]. Available: <https://pubmed.ncbi.nlm.nih.gov/36162896/>.
- [118] T. Farook, N. Jamayet, J. Abdullah, Z. Rajion, and M. Alam, "A systematic review of the computerized tools and digital techniques applied to fabricate nasal, auricular, orbital and ocular prostheses for facial defect rehabilitation," *Journal of stomatology, oral and maxillofacial surgery*, vol. 121, no. 3, pp. 268–277, 2020.
- [119] E. M. Van Lieshout *et al.*, "Personalized 3d-printed forearm braces as an alternative for a traditional plaster cast or splint; a systematic review," *Injury*, 2022.
- [120] A. Daryabor, T. Kobayashi, H. Saeedi, S. M. Lyons, N. Maeda, and S. S. Naimi, "Effect of 3d printed insoles for people with flatfeet: A systematic review," *Assistive Technology*, vol. 35, no. 2, pp. 169–179, 2023.
- [121] E. Wojciechowski *et al.*, "Feasibility of designing, manufacturing and delivering 3d printed ankle-foot orthoses: A systematic review," *Journal of foot and ankle research*, vol. 12, no. 1, pp. 1–12, 2019.
- [122] H. E. Abbady *et al.*, "3d-printed prostheses in developing countries: A systematic review," *Prosthetics and Orthotics International*, vol. 46, no. 1, pp. 19–30, 2022.
- [123] L. E. Diment, M. S. Thompson, and J. H. Bergmann, "Three-dimensional printed upper-limb prostheses lack randomised controlled trials: A systematic review," *Prosthetics and orthotics international*, vol. 42, no. 1, pp. 7–13, 2018.
- [124] J. L. G. F. da Silva, S. M. B. Gonçalves, H. H. P. da Silva, and M. P. T. da Silva, "Three-dimensional printed exoskeletons and orthoses for the upper limb—a systematic review," *Prosthetics and Orthotics International*, pp. 10–1097, 2022.
- [125] D. A. Schwartz and K. A. Schofield, "Utilization of 3d printed orthoses for musculoskeletal conditions of the upper extremity: A systematic review," *Journal of Hand Therapy*, 2021.

- [126] Y Shi, J Wang, C Ma, J Shen, X Dong, and D Lin, "A systematic review of the accuracy of digital surgical guides for dental implantation," *International journal of implant dentistry*, vol. 9, p. 38, 1 2023, ISSN: 2198-4034 (Electronic). DOI: [10.1186/s40729-023-00507-w](https://doi.org/10.1186/s40729-023-00507-w). [Online]. Available: <https://pubmed.ncbi.nlm.nih.gov/37875645/>.
- [127] J. Verweij, F. Jongkees, D. A. Moin, D Wismeijer, and J. Van Merkesteyn, "Autotransplantation of teeth using computer-aided rapid prototyping of a three-dimensional replica of the donor tooth: A systematic literature review," *International journal of oral and maxillofacial surgery*, vol. 46, no. 11, pp. 1466–1474, 2017.
- [128] P. Azimi, T. Yazdanian, E. C. Benzel, A. Azimi, and A. Montazeri, "3d-printed navigation template in cervical spine fusion: A systematic review and meta-analysis," *European Spine Journal*, vol. 30, pp. 389–401, 2021.
- [129] C. Yu, Y. Ou, C. Xie, Y. Zhang, J. Wei, and X. Mu, "Pedicle screw placement in spinal neurosurgery using a 3d-printed drill guide template: A systematic review and meta-analysis," *Journal of Orthopaedic Surgery and Research*, vol. 15, no. 1, pp. 1–11, 2020.
- [130] N. Wallace, B. B. Butt, I. Aleem, and R. Patel, "Three-dimensional printed drill guides versus fluoroscopic-guided freehand technique for pedicle screw placement: A systematic review and meta-analysis of radiographic, operative, and clinical outcomes," *Clinical Spine Surgery*, vol. 33, no. 8, pp. 314–322, 2020.
- [131] W. Liang *et al.*, "3d-printed drill guide template, a promising tool to improve pedicle screw placement accuracy in spinal deformity surgery: A systematic review and meta-analysis," *European spine journal*, vol. 30, pp. 1173–1183, 2021.
- [132] H. A. O'Connor, L. W. Adams, L. N. MacFadden, and N. W. Skelley, "3d printed orthopaedic external fixation devices: A systematic review," *3D Printing in Medicine*, vol. 9, no. 1, pp. 1–12, 2023.
- [133] Z. S. Aman, N. N. DePhillipo, L. A. Peebles, F. Familiari, R. F. LaPrade, and T. J. Dekker, "Improved accuracy of coronal alignment can be attained using 3d-printed patient-specific instrumentation for knee osteotomies: A systematic review of level iii and iv studies," *Arthroscopy: The Journal of Arthroscopic & Related Surgery*, vol. 38, no. 9, pp. 2741–2758, 2022.
- [134] C. Lu *et al.*, "Comparison of 3d-printed navigation template-assisted pedicle screws versus free-hand screws for scoliosis in children and adolescents: A systematic review and meta-analysis," *Journal of Neurological Surgery Part A: Central European Neurosurgery*, vol. 84, no. 02, pp. 188–197, 2023.
- [135] T. T. Oliveira and A. C. Reis, "Fabrication of dental implants by the additive manufacturing method: A systematic review," *The Journal of prosthetic dentistry*, vol. 122, no. 3, pp. 270–274, 2019.
- [136] V. Rutkūnas, A. Gedrimienė, L. Auškalnis, O. Admakin, and F. Mangano, "Accuracy of fixed implant-supported dental prostheses additively manufactured by metal, ceramic, or polymer: A systematic review," *Journal of Prosthodontics*, vol. 31, no. S1, pp. 70–87, 2022.
- [137] S. Bae *et al.*, "Reliability of metal 3d printing with respect to the marginal fit of fixed dental prostheses: A systematic review and meta-analysis," *Materials*, vol. 13, no. 21, p. 4781, 2020.
- [138] J. L. Burnard, W. C. Parr, W. J. Choy, W. R. Walsh, and R. J. Mobbs, "3d-printed spine surgery implants: A systematic review of the efficacy and clinical safety profile of patient-specific and off-the-shelf devices," *European Spine Journal*, vol. 29, pp. 1248–1260, 2020.
- [139] A. M. Goodson, M. A. Kittur, P. L. Evans, and E. M. Williams, "Patient-specific, printed titanium implants for reconstruction of mandibular continuity defects: A systematic review of the evidence," *Journal of Cranio-Maxillofacial Surgery*, vol. 47, no. 6, pp. 968–976, 2019.
- [140] N. Wallace, N. E. Schaffer, I. S. Aleem, and R. Patel, *3d-printed patient-specific spine implants a systematic review*, 2020. [Online]. Available: [www.clinicalspinesurgery.com](http://www.clinicalspinesurgery.com).
- [141] J. Zoltan, D. Popescu, and S. H. R. Sanei, *A systematic review of follow-up results of additively manufactured customized implants for the pelvic area*, 2023. DOI: [10.1080/17434440.2023.2183839](https://doi.org/10.1080/17434440.2023.2183839).
- [142] A. M. Christensen, K. Weimer, C. Beaudreau, M. Rensberger, and B. Johnson, "The digital thread for personalized craniomaxillofacial surgery," *Digital Technologies in Craniomaxillofacial Surgery*, pp. 23–45, 2018.
- [143] T. A. Kostakos, S. K. Nayar, H. Alcock, O. Savvidou, K. Vlasias, and P. J. Papagelopoulos, "Acetabular reconstruction in oncological surgery: A systematic review and meta-analysis of implant survivorship and patient outcomes," *Surgical Oncology*, vol. 38, p. 101 635, 2021.
- [144] A. Della Bona, V. Cantelli, V. T. Britto, K. F. Colares, and J. W. Stansbury, "3d printing restorative materials using a stereolithographic technique: A systematic review," *Dental Materials*, vol. 37, no. 2, pp. 336–350, 2021.
- [145] M. N. Hassan, M. A. Yassin, S. Suliman, S. A. Lie, H. Gjengedal, and K. Mustafa, "The bone regeneration capacity of 3d-printed templates in calvarial defect models: A systematic review and meta-analysis," *Acta biomaterialia*, vol. 91, pp. 1–23, 2019.
- [146] S. Jain *et al.*, "Physical and mechanical properties of 3d-printed provisional crowns and fixed dental prosthesis resins compared to cad/cam milled and conventional provisional resins: A systematic review and meta-analysis," *Polymers*, vol. 14, no. 13, p. 2691, 2022.
- [147] S. P. Tarassoli, Z. M. Jessop, T. Jovic, K. Hawkins, and I. S. Whitaker, "Candidate bioinks for extrusion 3d bioprinting—a systematic review of the literature," *Frontiers in bioengineering and biotechnology*, p. 383, 2021.
- [148] Y. Wu, P. Kennedy, N. Bonazza, Y. Yu, A. Dhawan, and I. Ozbolat, "Three-dimensional bioprinting of articular cartilage: A systematic review," *Cartilage*, vol. 12, no. 1, pp. 76–92, 2021.

- [149] Y. Zheng, W. Zhang, D. M. Baca Lopez, and R. Ahmad, "Scientometric analysis and systematic review of multi-material additive manufacturing of polymers," *Polymers*, vol. 13, no. 12, p. 1957, 2021.
- [150] K. Patrias and D. L. Wendling, *Citing medicine: The NLM style guide for authors, editors, and publishers*. Department of Health and Human Services, National Institutes of Health, US . . . , 2007.
